# Supplementary material for: Reappraisal and Analysis of Macroseismic Data for Seismotectonic Purposes: The Strong Earthquakes of Southern Calabria, Italy
Source: MDPI journal article supplement (doi:10.3390/geosciences13070212), 2023-07-14
Supplement: s1 [file s1]

## Supplementary Figures and Tables for:

# Reappraisal and analysis of macroseismic data for seismotectonic purposes: the Southern Calabria strong earthquakes (Italy)

**Carlo Andrenacci<sup>1,2</sup>, Simone Bello<sup>1,2\*</sup>, Maria Serafina Barbano<sup>2,3,4</sup>, Rita de Nardis<sup>1,2</sup>,  
Claudia Pirrotta<sup>2,3</sup>, Federico Pietrolungo<sup>1,2</sup> and Giusy Lavecchia<sup>1,2</sup>**

<sup>1</sup>DiSPuTer, University G. d'Annunzio, via dei Vestini 31, Chieti 66100, Italy;

<sup>2</sup>CRUST - Interuniversity Center for 3D Seismotectonics with Territorial Applications 66100, Chieti, Italy;

<sup>3</sup>Dipartimento di Scienze Biologiche, Geologiche e Ambientali, Università di Catania, 95129 Catania, Italy;

<sup>4</sup>Istituto Nazionale di Geofisica e Vulcanologia, (INGV) Catania, Italy

\*Correspondence: [simone.bello@unich.it](mailto:simone.bello@unich.it)

This Supporting Figures and Tables file contains the following information:

|                                                                                                              |    |
|--------------------------------------------------------------------------------------------------------------|----|
| <b>WORKFLOW OF DATA COLLECTION AND ANALYSIS METHODOLOGY (Figure S1)</b> .....                                | 2  |
| <b>MACROSEISMIC FIELD OF THE 05 FEBRUARY 1783 (Figure S2)</b> .....                                          | 3  |
| <b>MACROSEISMIC FIELD OF THE 06 FEBRUARY 1783 (Figure S3)</b> .....                                          | 4  |
| <b>MACROSEISMIC FIELD OF THE 07 FEBRUARY 1783 (Figure S4)</b> .....                                          | 5  |
| <b>MACROSEISMIC FIELD OF THE 01 MARCH 1783 (Figure S5)</b> .....                                             | 6  |
| <b>MACROSEISMIC FIELD OF THE 28 MARCH 1783 (Figure S6)</b> .....                                             | 7  |
| <b>MACROSEISMIC FIELD OF THE 13 OCTOBER 1791 (Figure S7)</b> .....                                           | 8  |
| <b>MACROSEISMIC FIELD OF THE 16 NOVEMBER 1894 (Figure S8)</b> .....                                          | 9  |
| <b>MACROSEISMIC FIELD OF THE 28 DECEMBER 1908 (Figure S9)</b> .....                                          | 10 |
| <b>METHODOLOGICAL TEST TO THE L'AQUILA 2009 EARTHQUAKE (Figure S10)</b> .....                                | 11 |
| <b>MACROSEISMIC SUB-FIELDS OF THE 1783 SEISMIC SEQUENCE (Figure S11)</b> .....                               | 12 |
| <b>MACROSEISMIC SUB-FIELDS OF THE 28 DECEMBER 1908 EARTHQUAKE (Figure S12)</b> .....                         | 13 |
| <b>MACROSEISMIC ELONGATION FIELDS OF THE 1783 SEISMIC SEQUENCE (Figure S13)</b> .....                        | 14 |
| <b>MACROSEISMIC ELONGATION FIELDS OF THE 1791, 1894 AND 1908 EARTHQUAKES (Figure S14)</b> .....              | 15 |
| <b>FIGURE FROM BARATTA 1910 (Figure S15)</b> .....                                                           | 16 |
| <b>TIME-SPACE EVOLUTION OF HISTORICAL-PARAMETRICAL EARTHQUAKES</b> .....                                     | 17 |
| List of historical and parametrical earthquakes from CPTI-15 in the area ( <b>Table S13</b> ) .....          | 17 |
| Map view of the historical and parametrical earthquakes from CPTI-15 in the area ( <b>Figure S16</b> ) ..... | 18 |
| Time-completeness graph for the earthquake catalogue presents in Table S13 ( <b>Figure S17</b> ) .....       | 19 |
| Map of historical earthquakes used for the Space-time diagram ( <b>Figure S18</b> ) .....                    | 20 |
| List of elliptical source parameters of the historical earthquakes ( <b>Table S14</b> ).....                 | 21 |

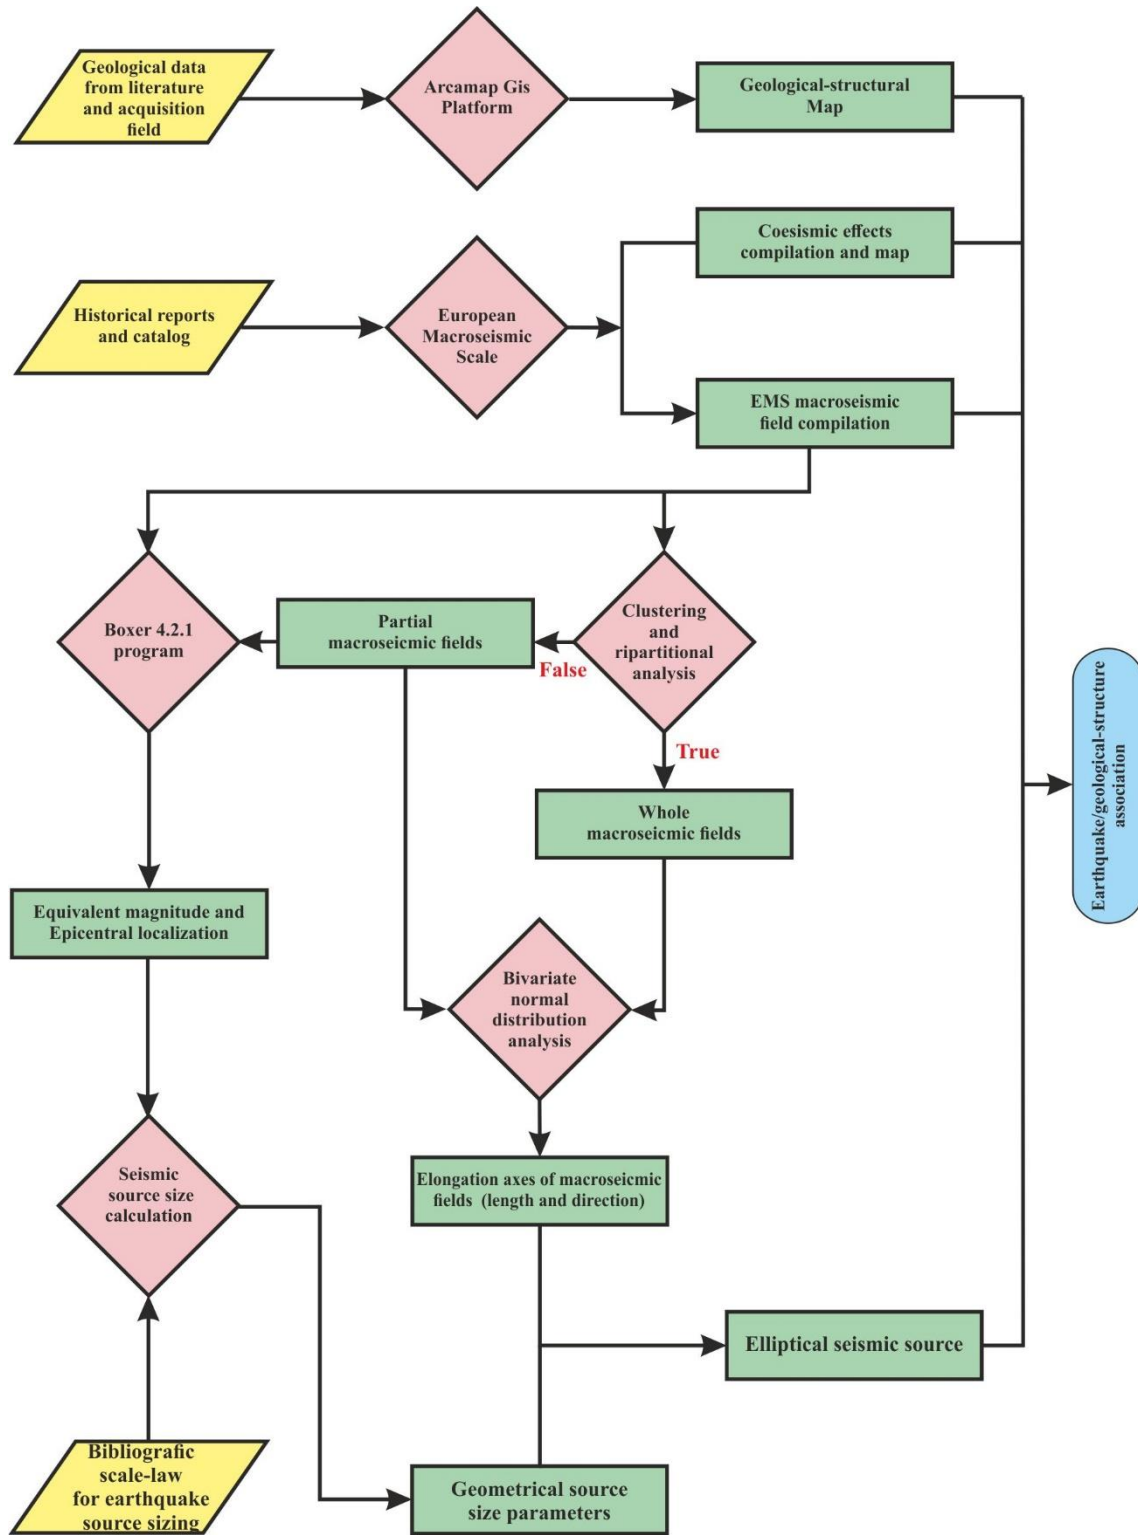

**Figure S1.** Workflow of data collection and analysis methodology. Key: **Yellow parallelogram:** initial input data; **pink rhomb:** Matlab algorithms and Softwares; **green rectangular:** partial or final results; **blue rounded rectangle:** final work contribution.

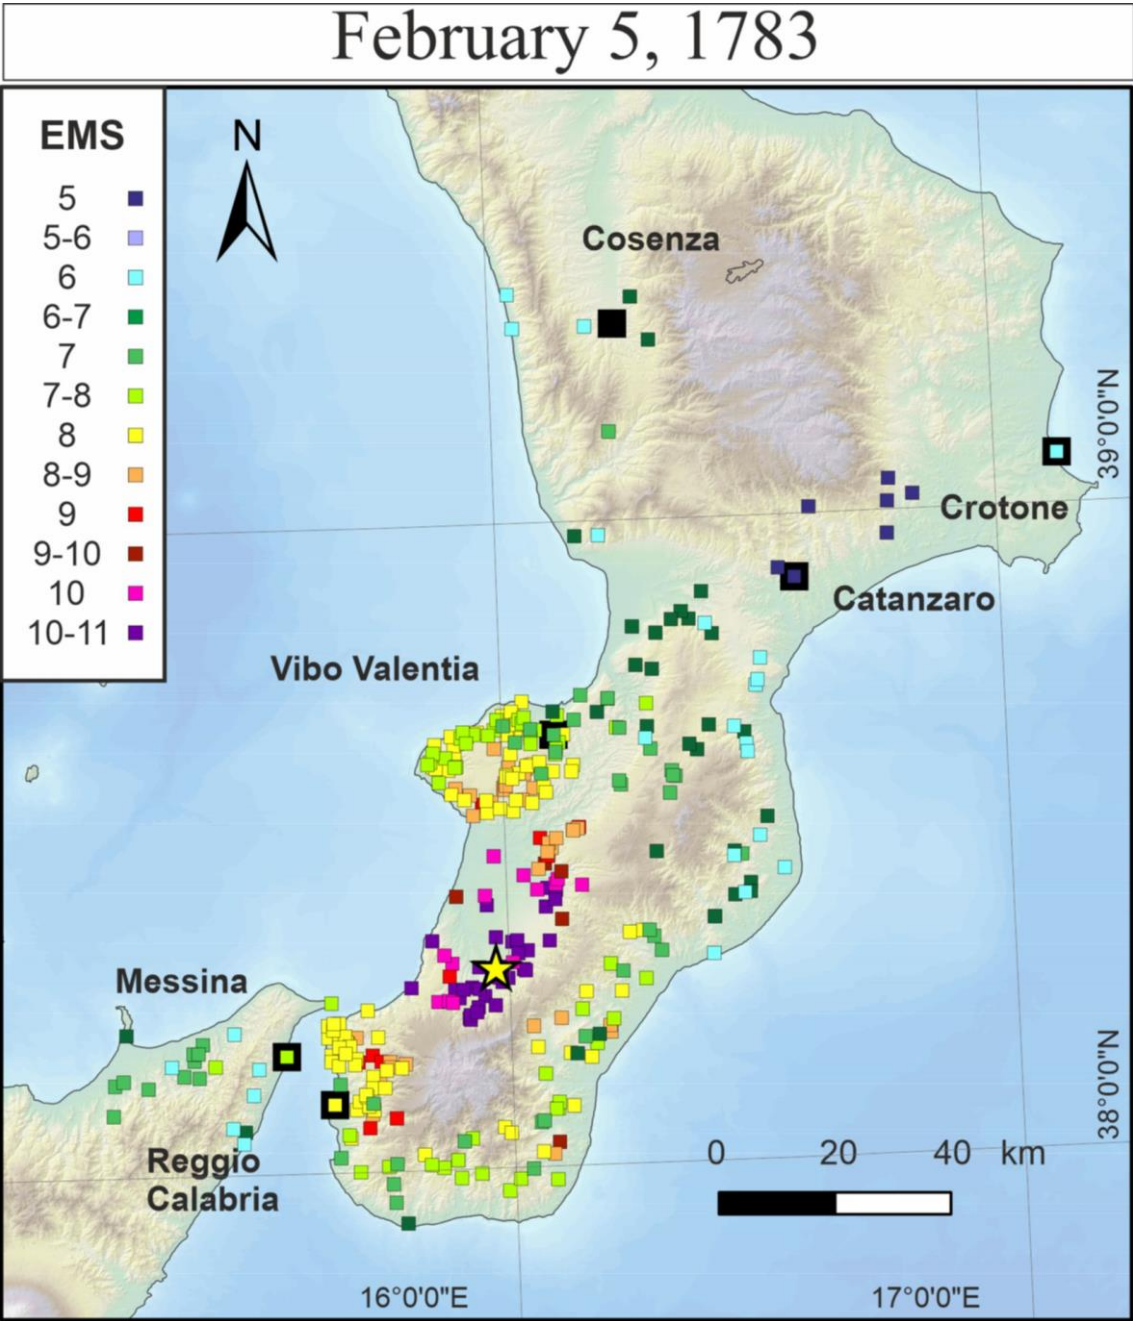

**Figure S2.** Macroseismic field of 5 February 1783 earthquake (see [Table S5](#) in the [Supplementary Data 2](#)).

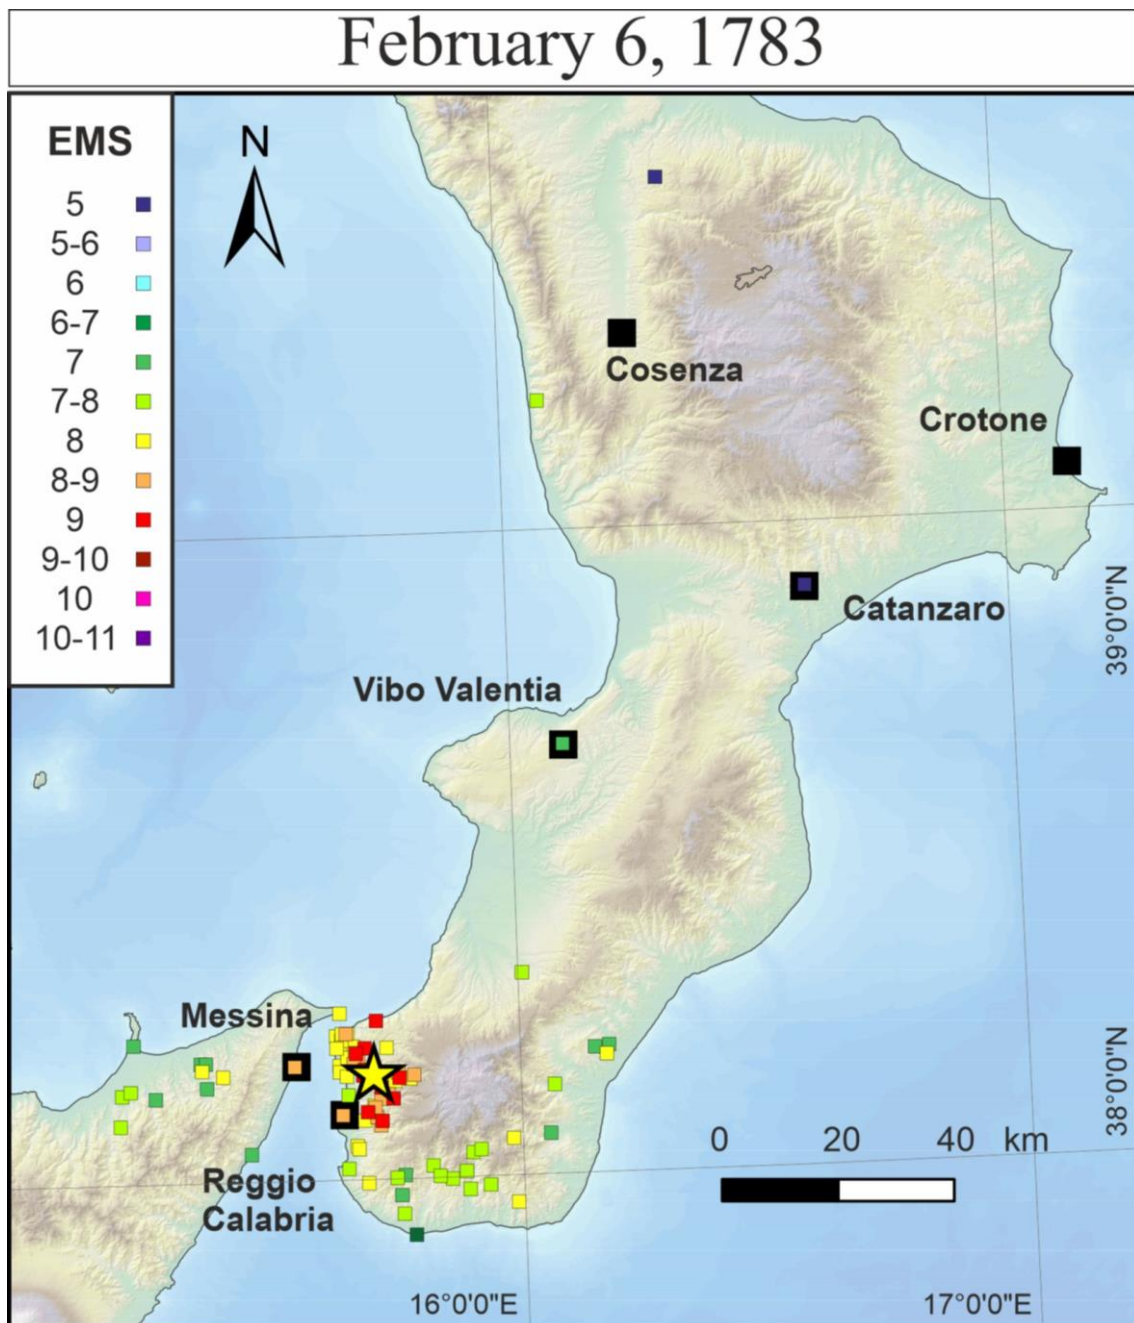

**Figure S3.** Macroseismic field of 6 February 1783 earthquake (see [Table S6](#) in the [Supplementary Data 2](#)).



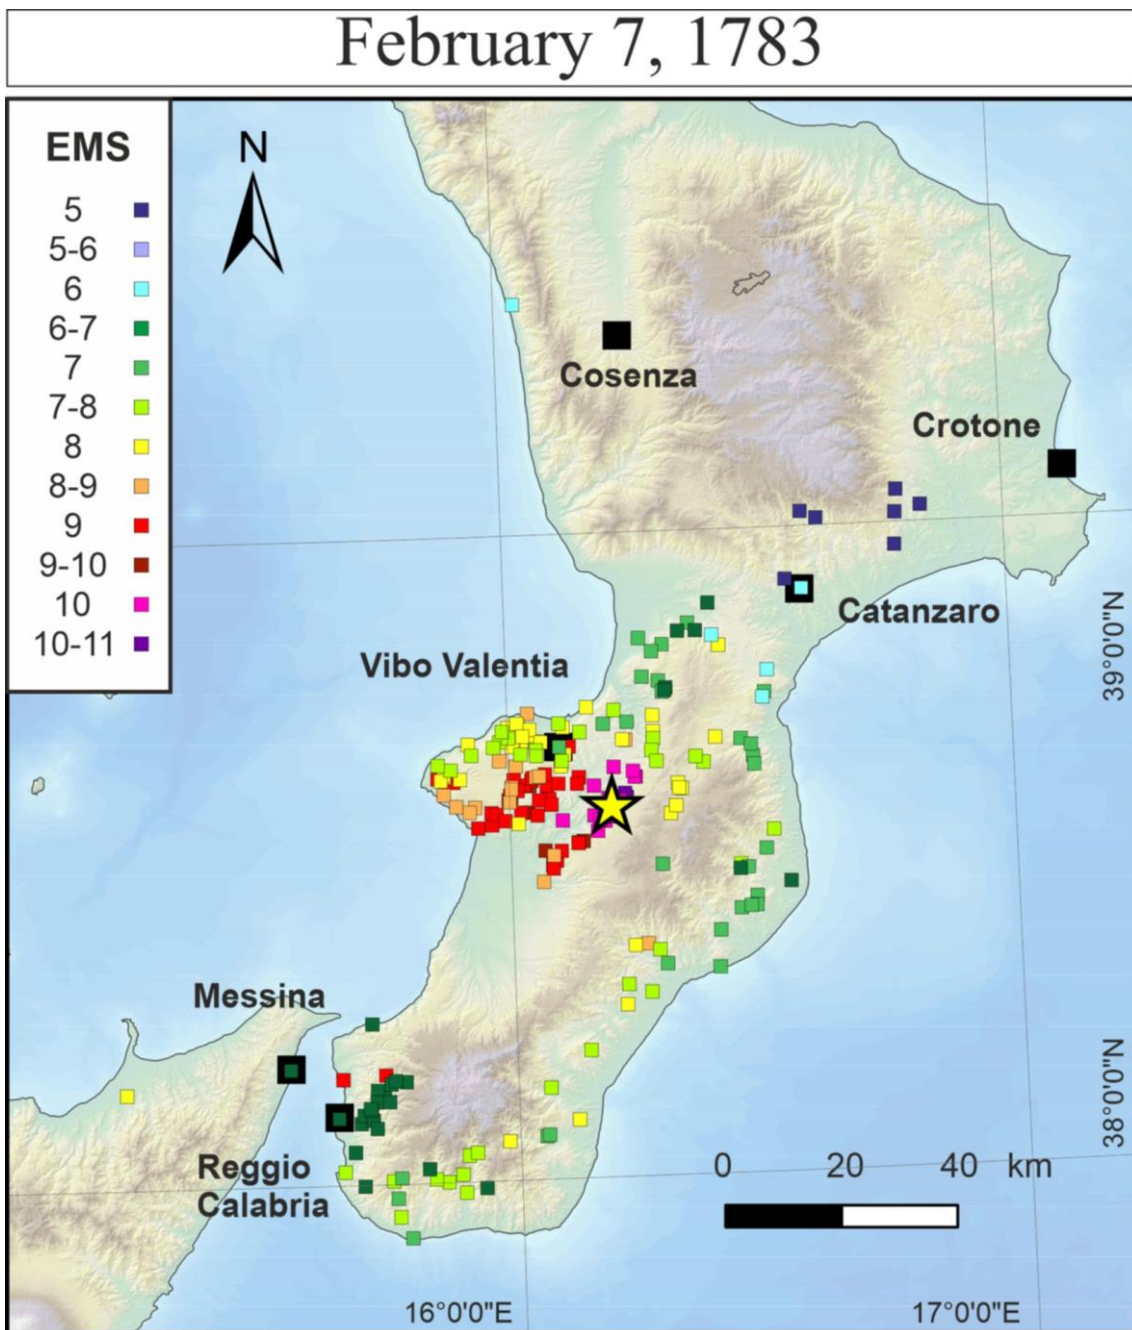

**Figure S4.** Macroseismic field of 7 February 1783 earthquake (see [Table S7](#) in the [Supplementary Data 2](#)).

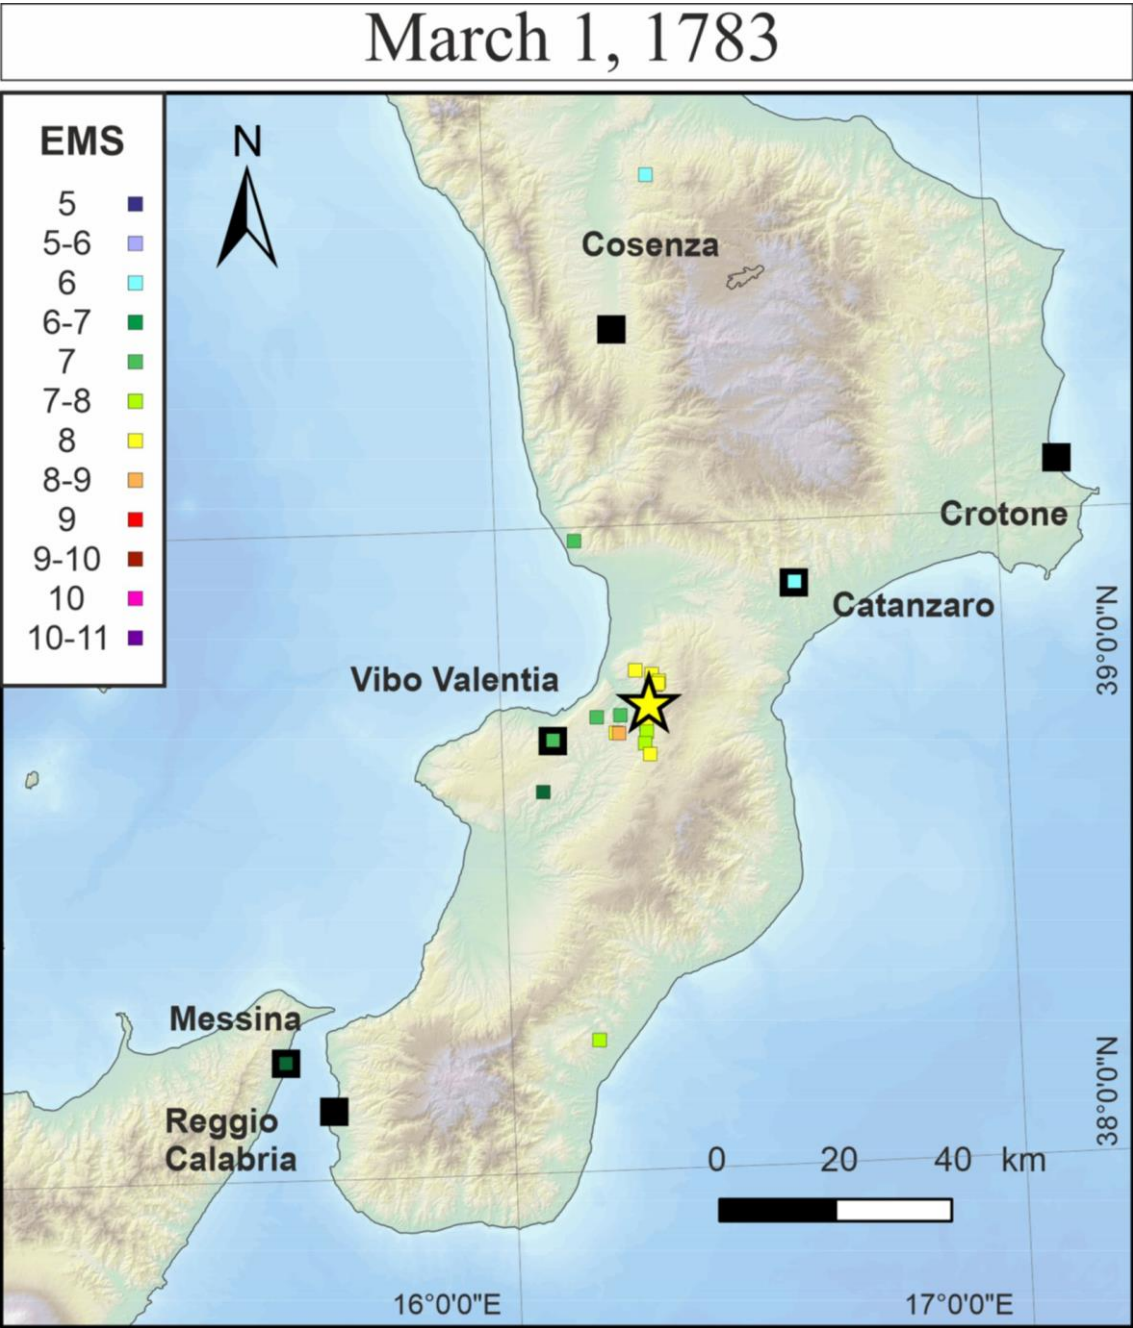

**Figure S5.** Macroseismic field of 1 March 1783 earthquake (see [Table S8](#) in the [Supplementary Data 2](#)).

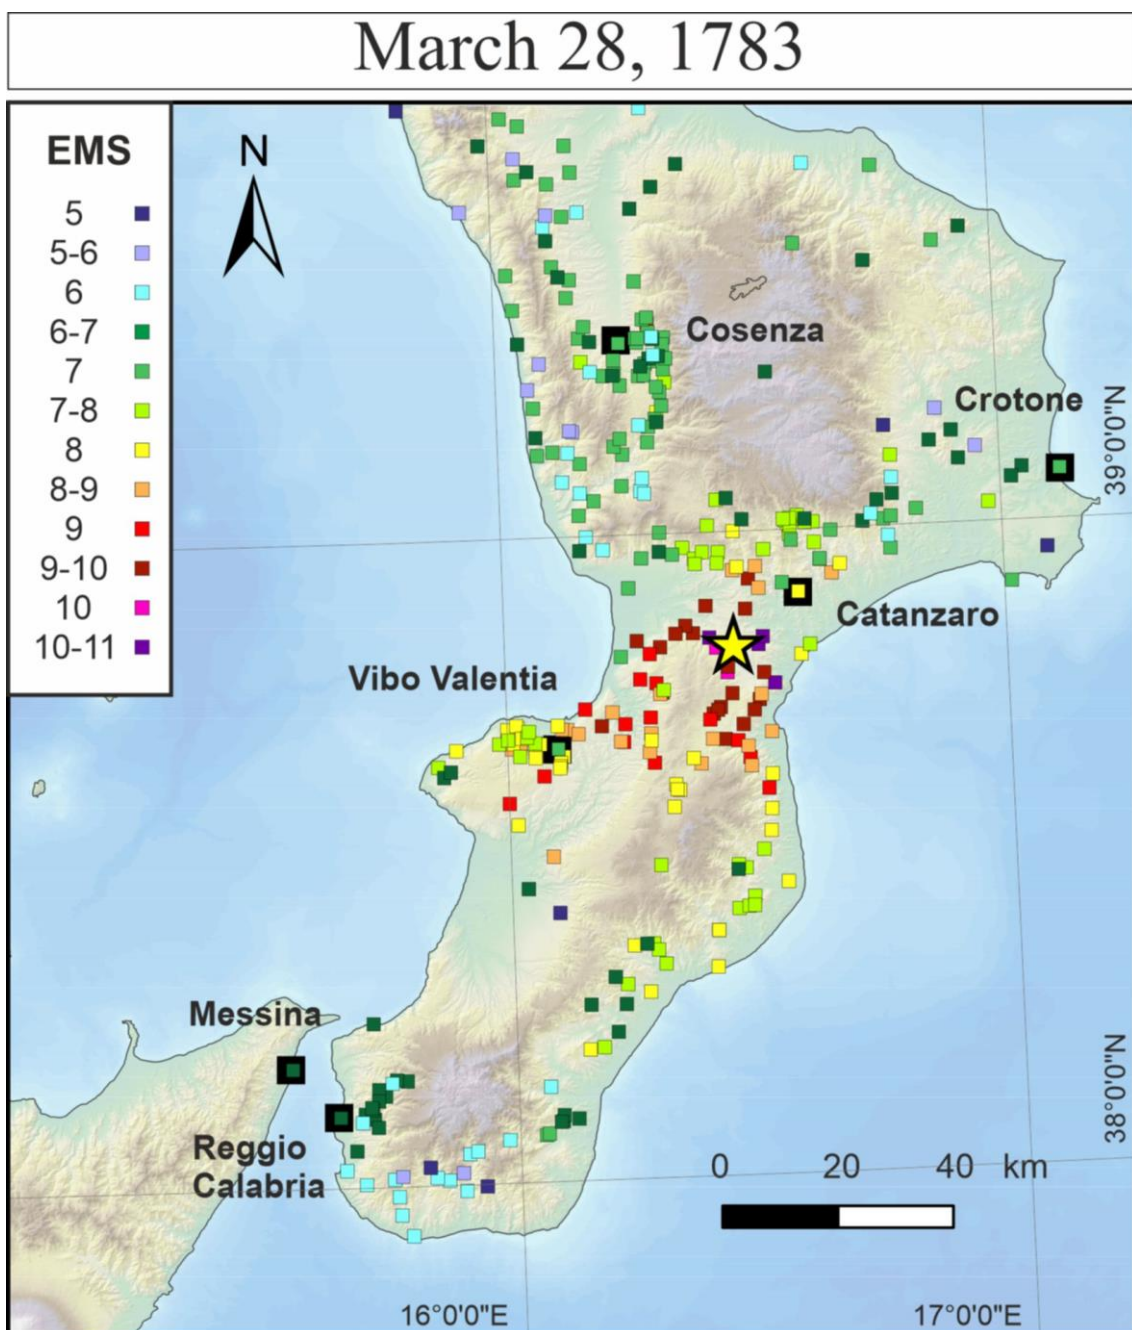

**Figure S6.** Macroseismic field of 28 March 1783 earthquake (see [Table S9](#) in the [Supplementary Data 2](#)).



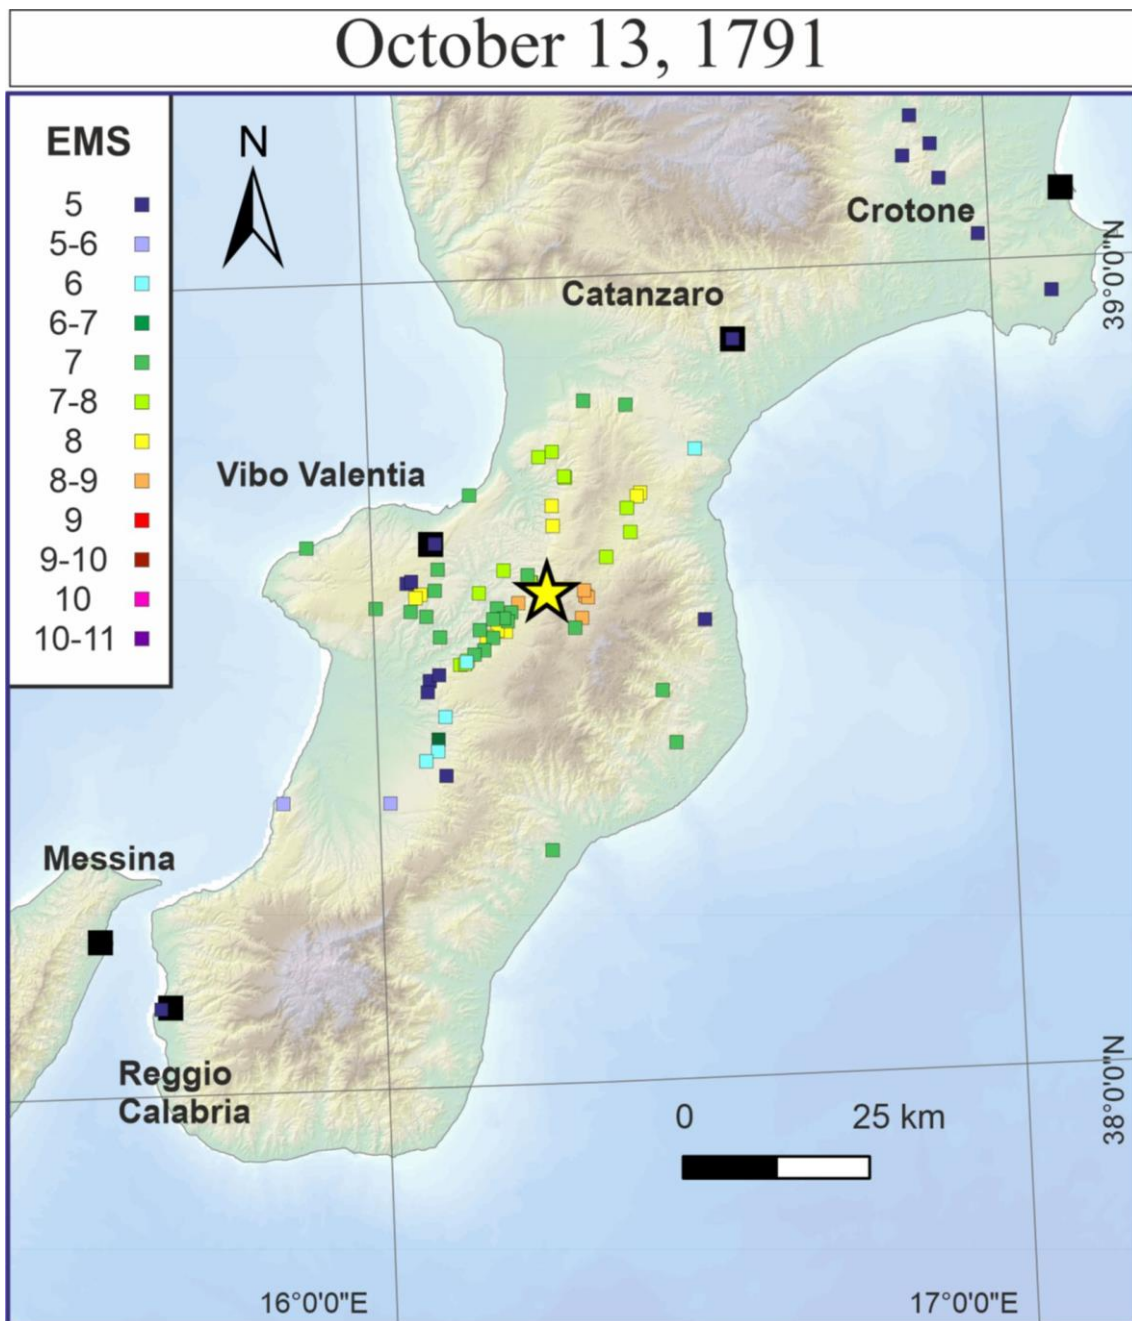

**Figure S7.** Macroseismic field of 13 October 1791 earthquake (see [Table S10](#) in the [Supplementary Data 2](#)).



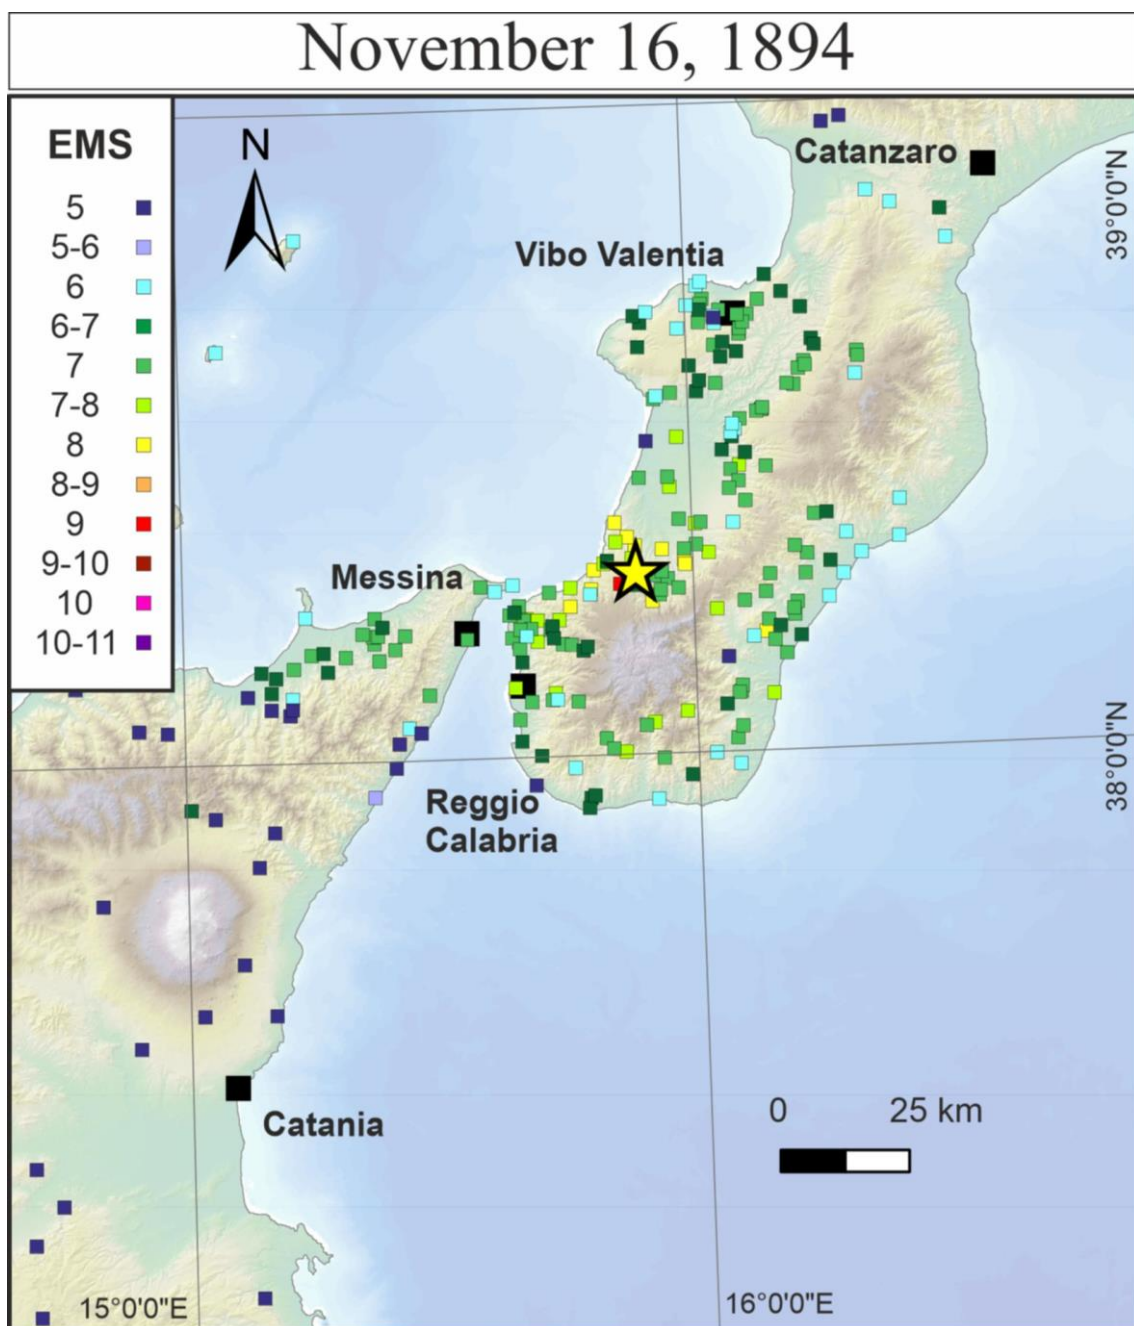

**Figure S8.** Macroseismic field of 16 November 1894 earthquake (see [Table S11](#) in the [Supplementary Data 2](#)).

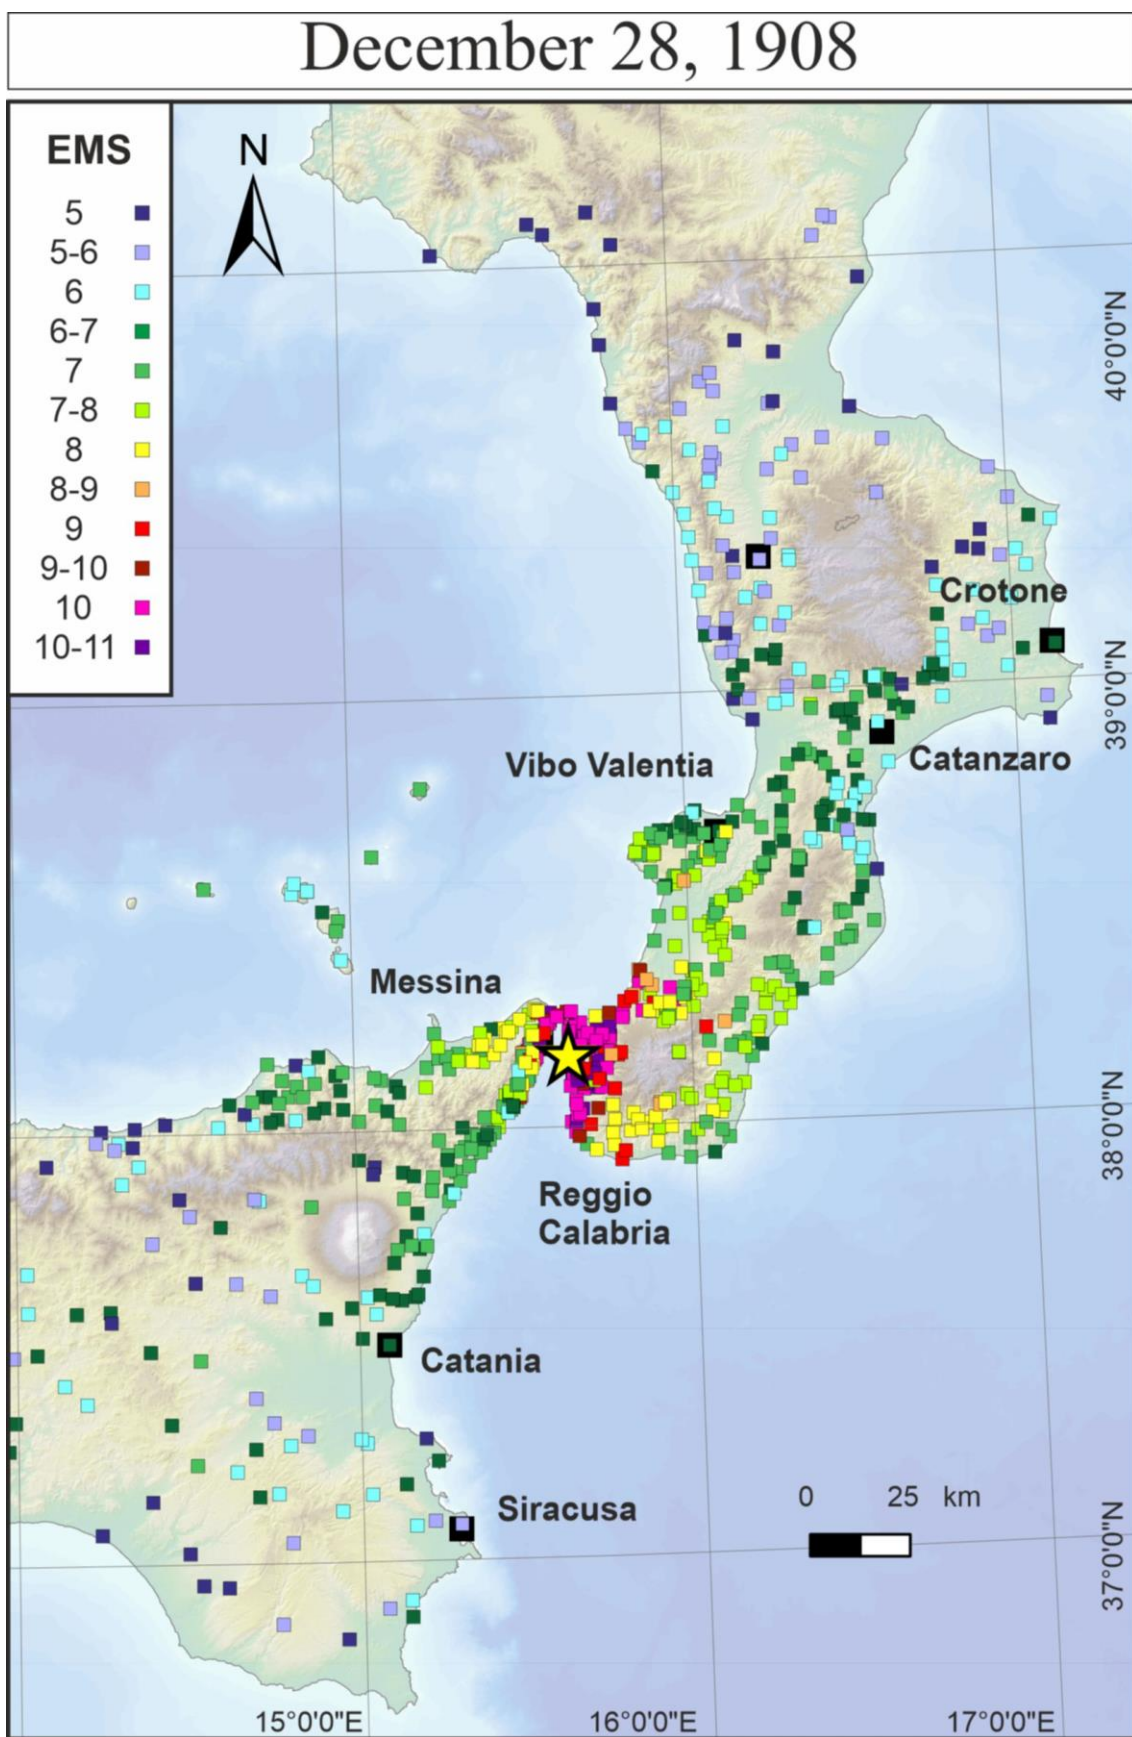

**Figure S9.** Macroseismic field of 28 December 1908 earthquake (see [Table S12](#) in the [Supplementary Data 2](#)).



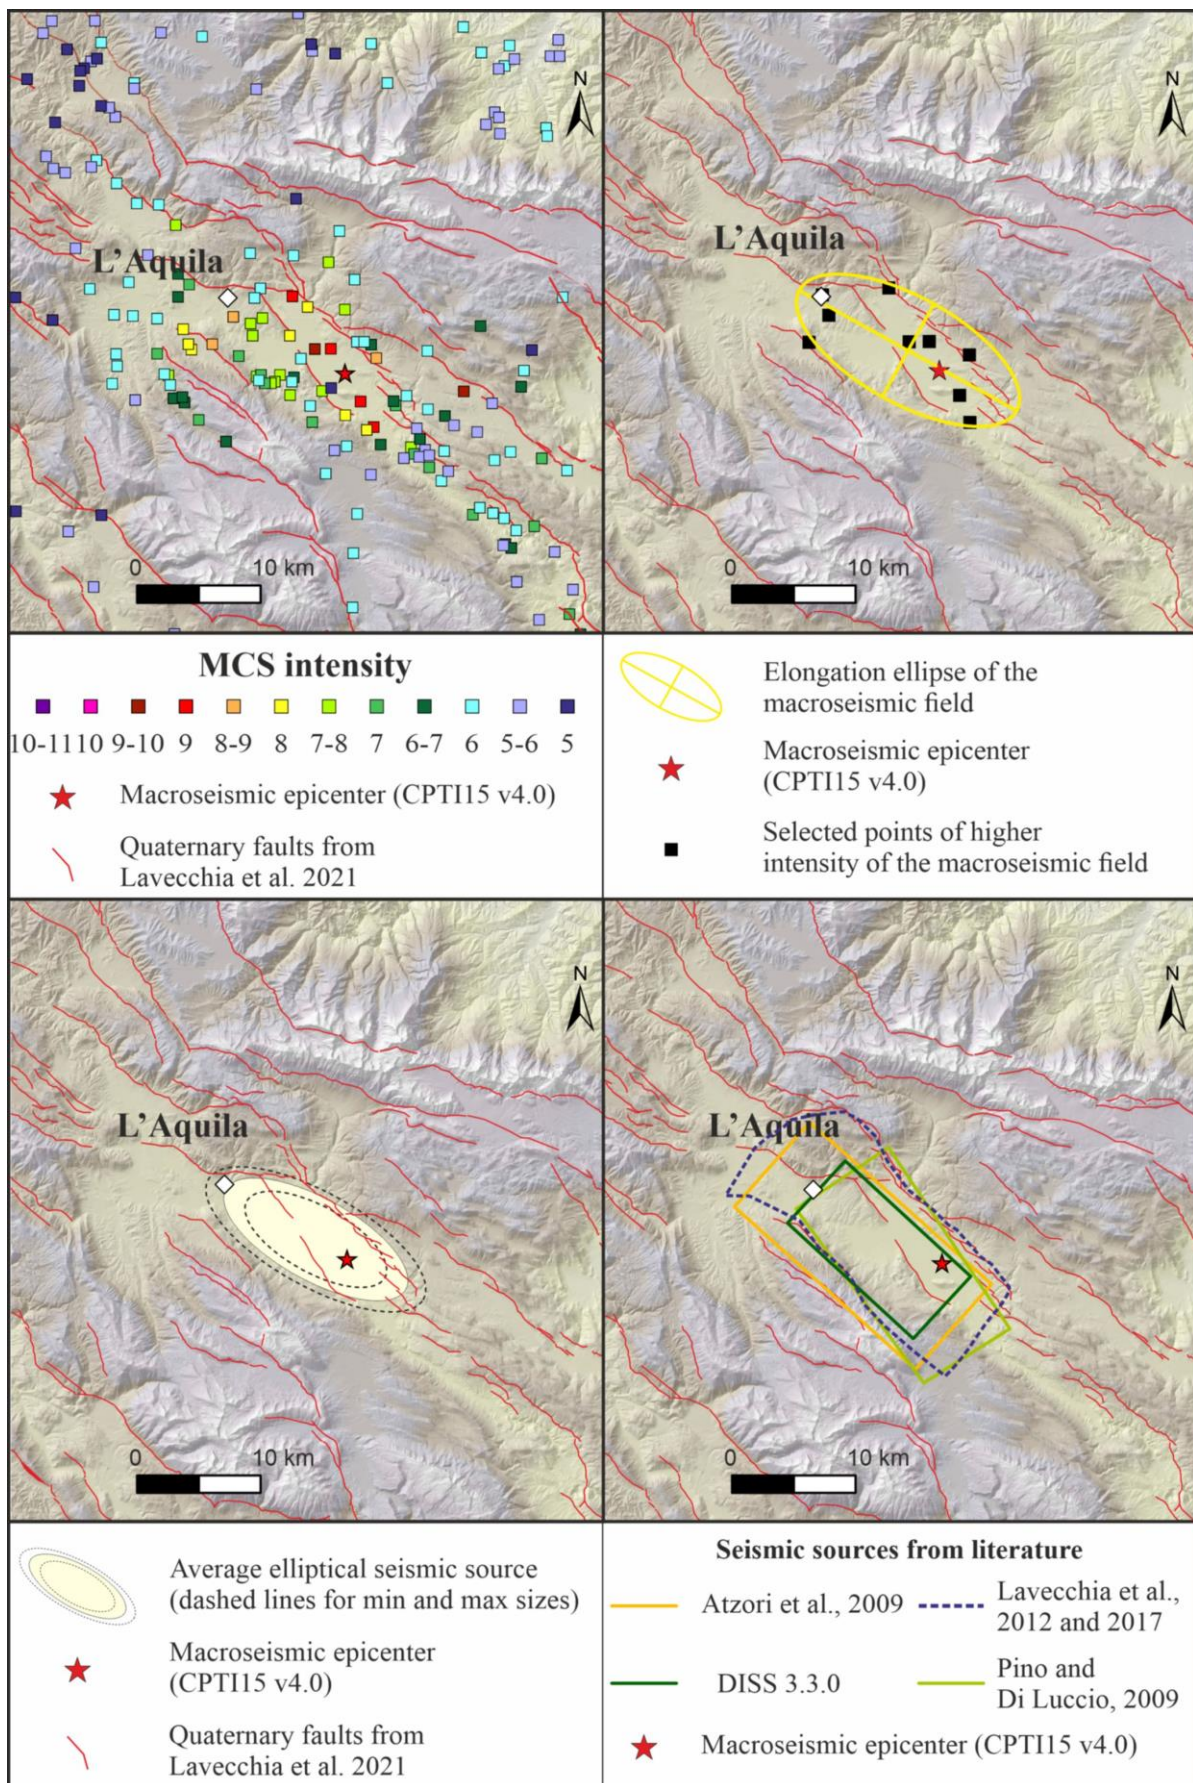

**Figure S10.** Application of our methodology to the case of the L'Aquila 2009 (Central Italy) earthquake.



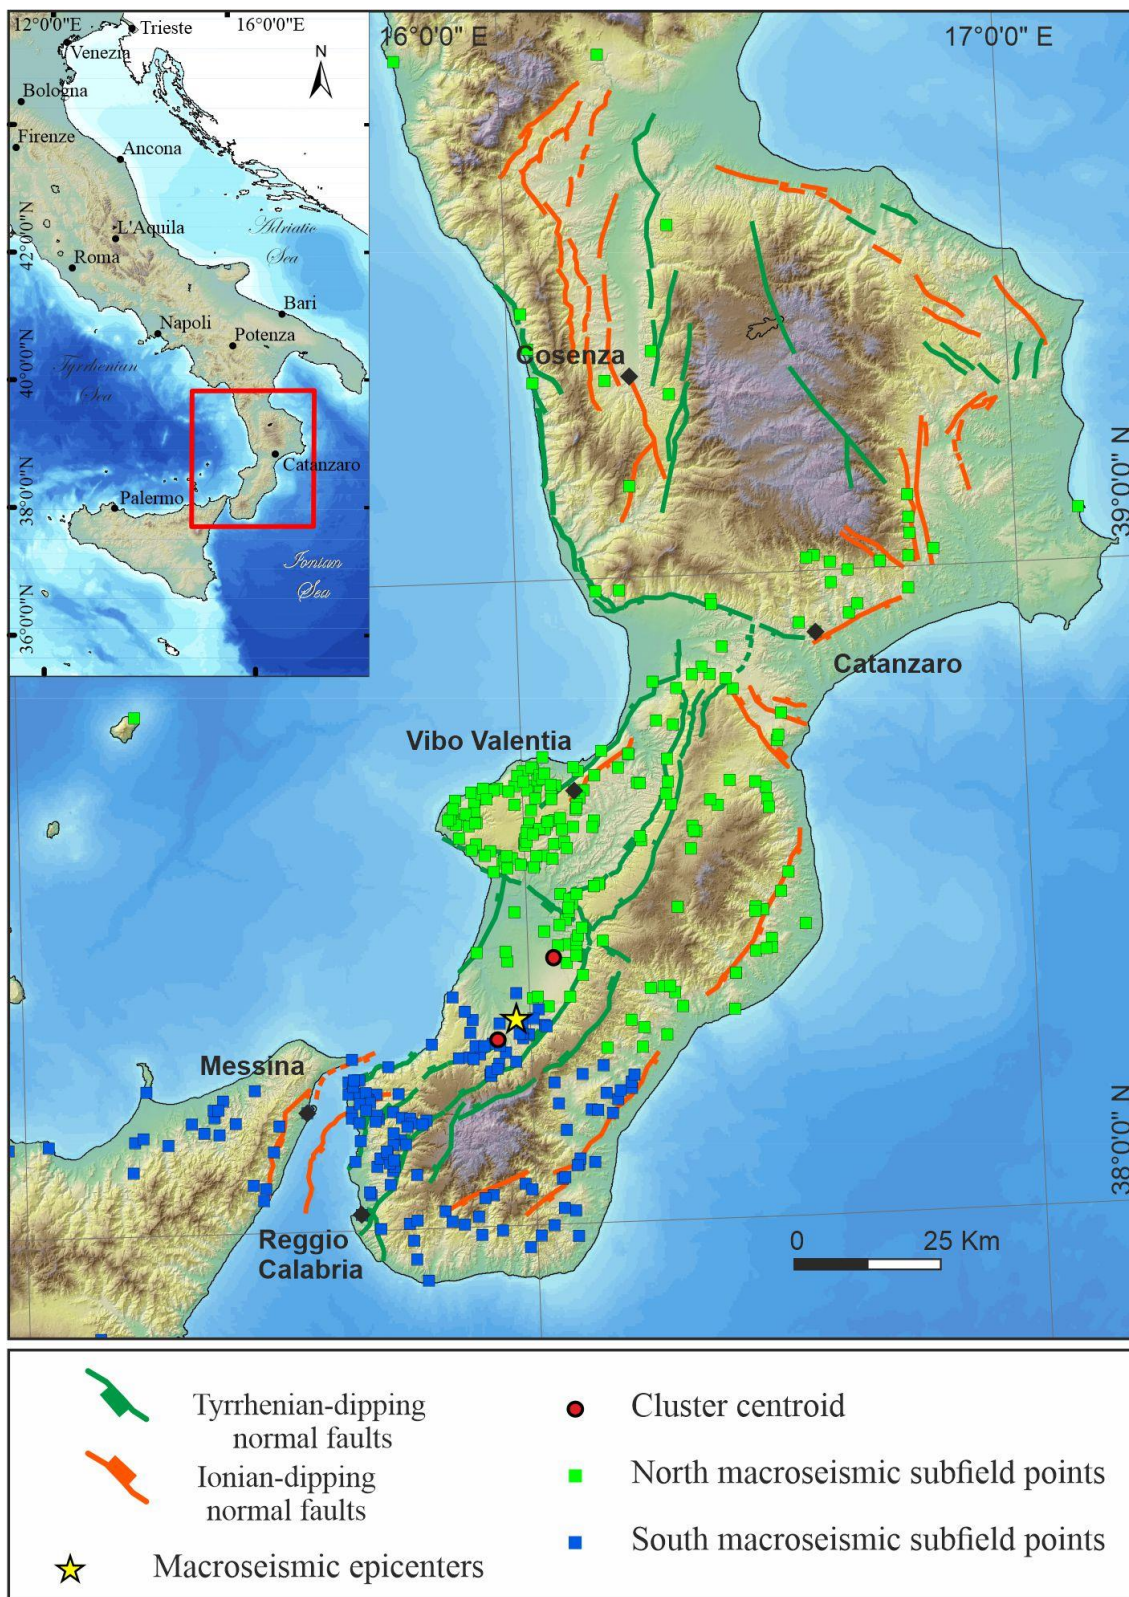

**Figure S11.** Separation of the macroseismic field of the 5 February 1783 earthquake based on the identification of centroids (red dots) obtained from the points of maximum intensity ( $I_{\max}$ ).



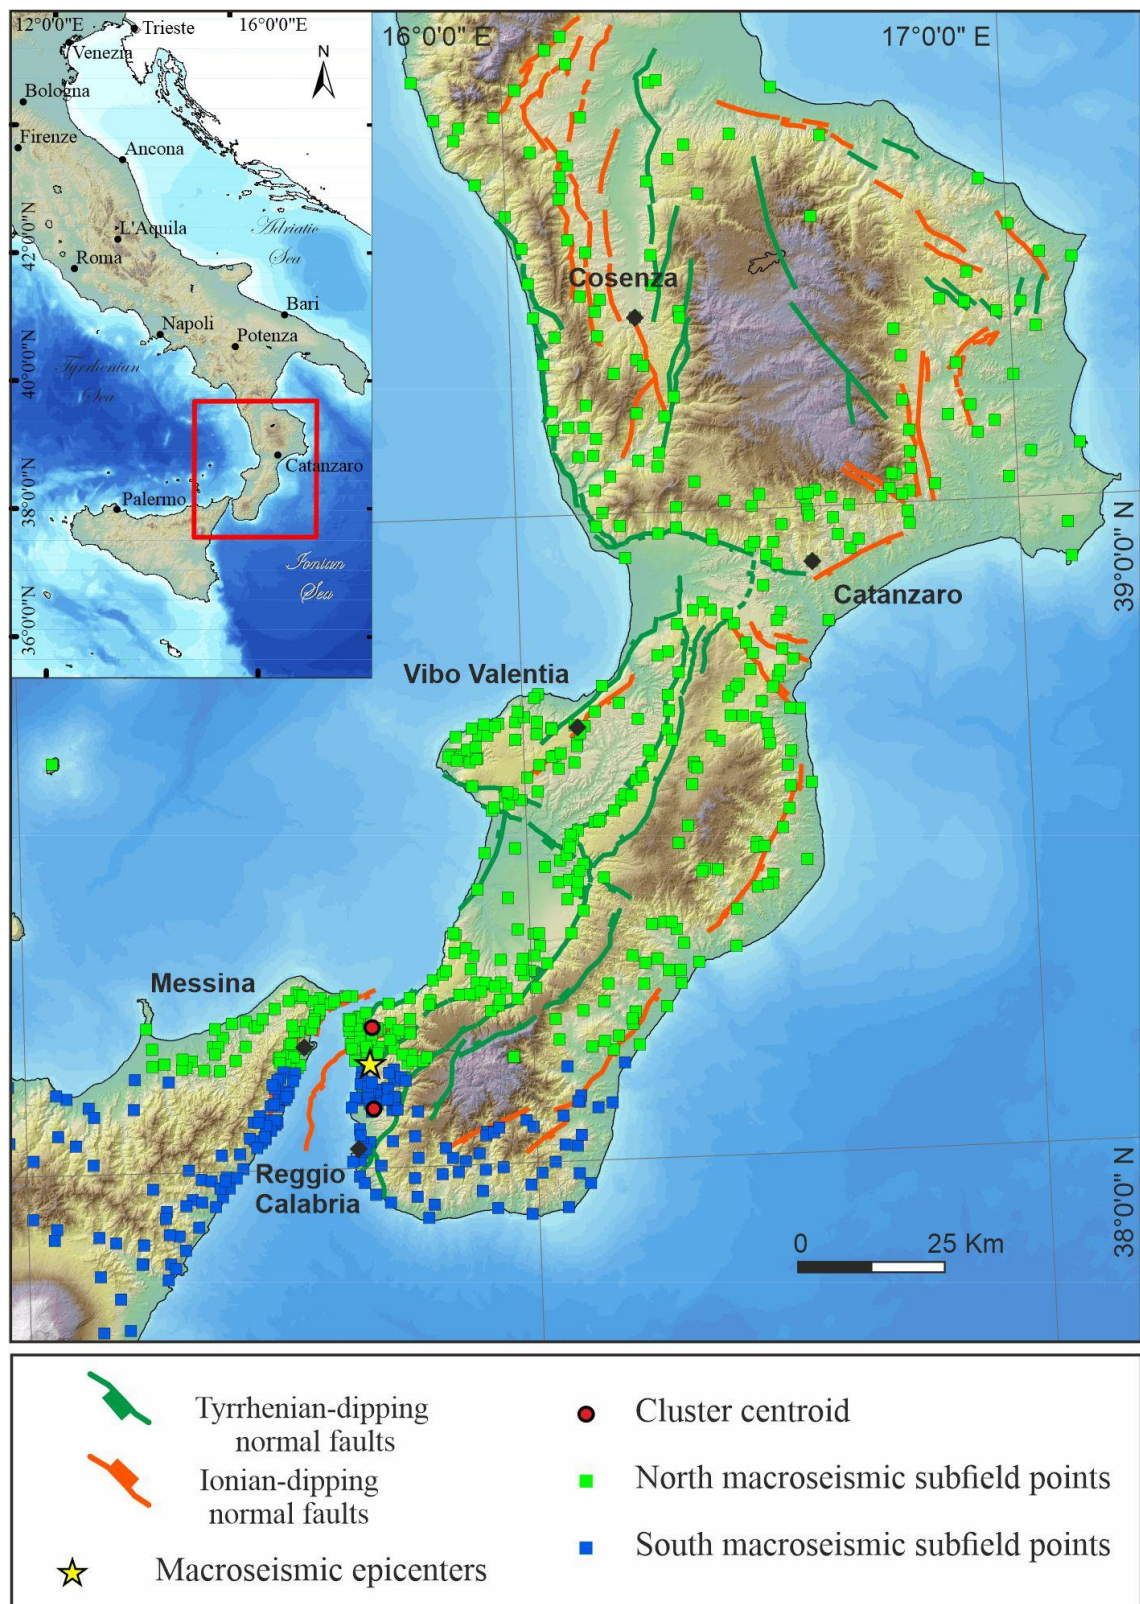

**Figure S12.** Separation of the macroseismic field of the 28 December 1908 earthquake based on the identification of centroids (red dots) obtained from the points of maximum intensity ( $I_{\max}$ ).

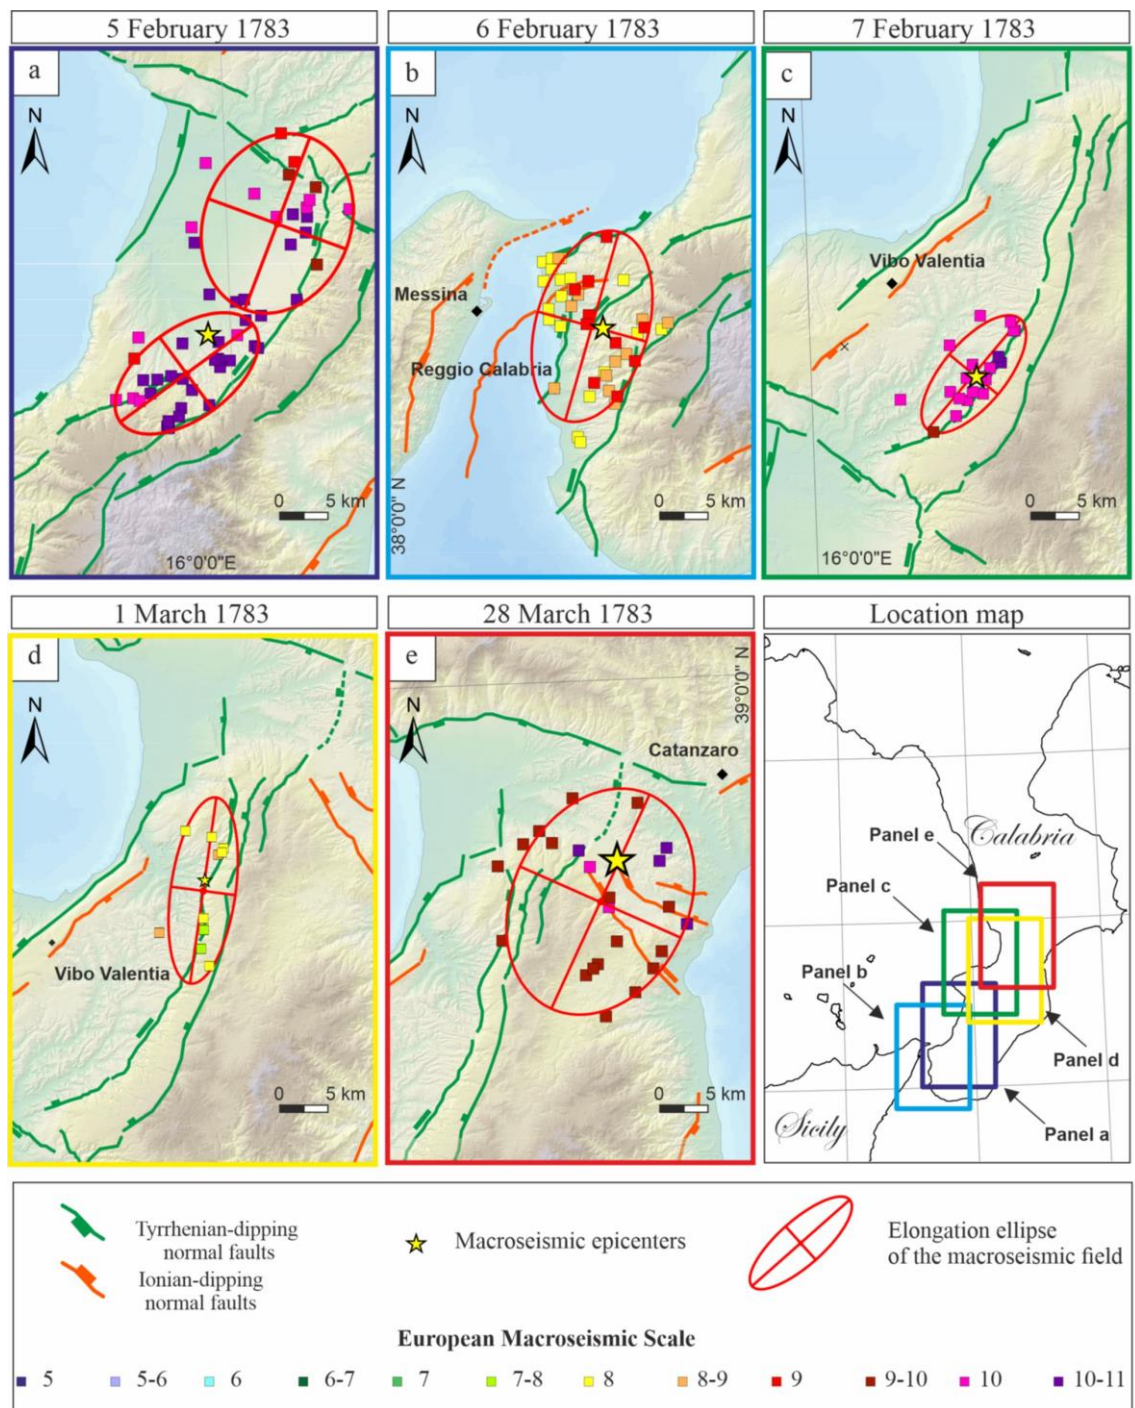

**Figure S13.** Ellipsis and barycenter of maximum elongation of the macroseismic field of the 1783 seismic sequence in central southern Calabria. (a) Ellipsis and highest selected points associated with the 5 February 1783 event; (b) Ellipse and highest selected points associated with the 6 February 1783 event; (c) Ellipse and highest selected points associated with the 7 February 1783 event; (d) Ellipse and highest selected points associated with the 1 March 1783 event; (e) Ellipse and highest selected points associated with the 28 March 1783 event.



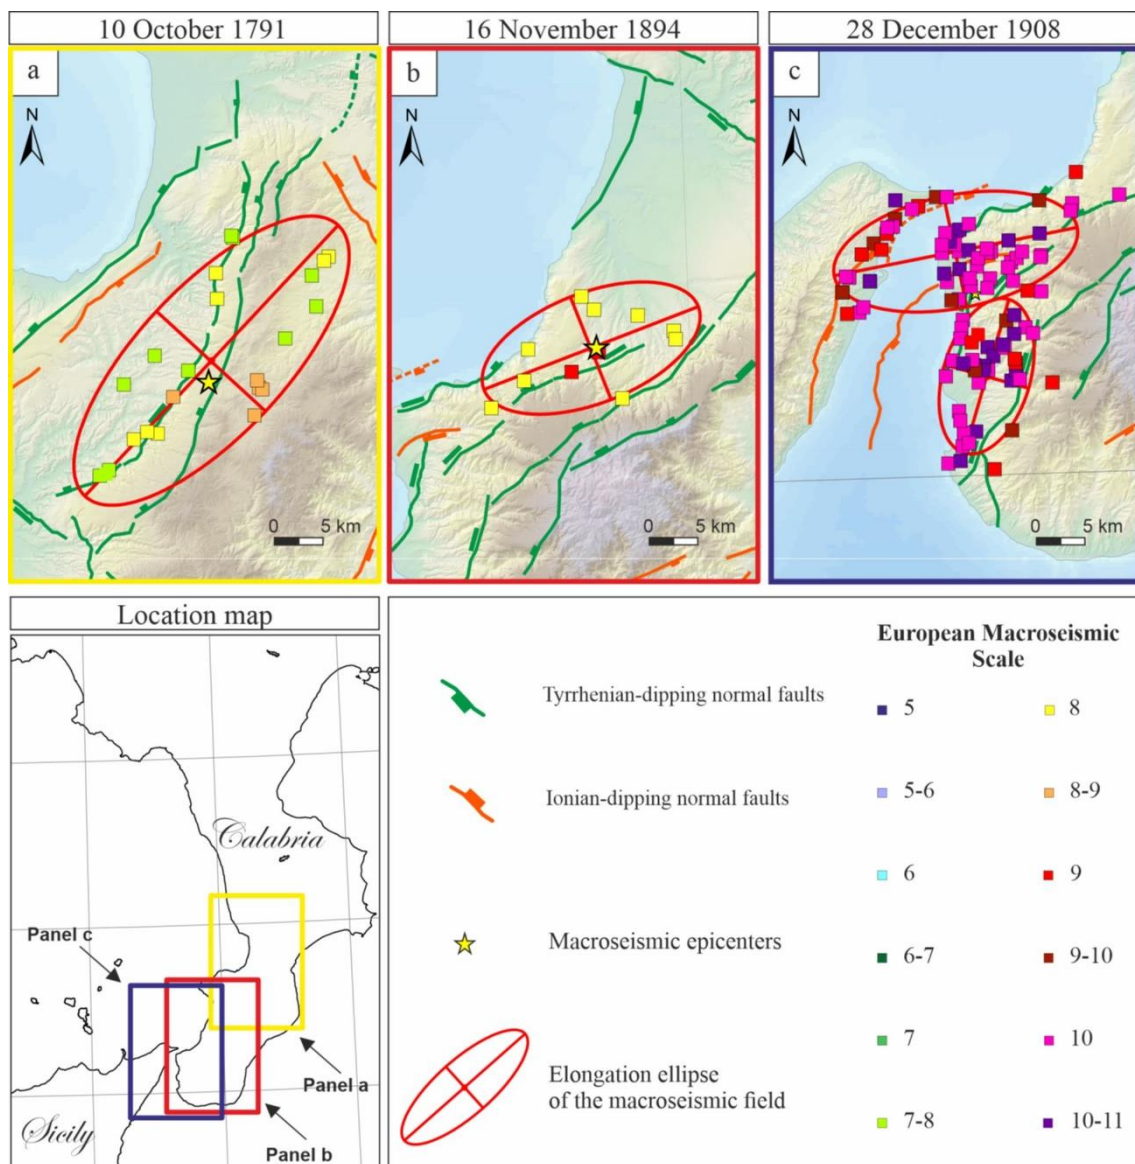

**Figure S14.** Ellipsis and barycenter of maximum elongation of the macroseismic field of the 1791, 1894 and 1908 in central and southern Calabria. (a) Ellipsis and highest selected points associated with the 10 October 1791 event; (b) Ellipse and highest selected points associated with the 16 November 1894 event; (c) Ellipse and highest selected points associated with the 28 December 1908 event.

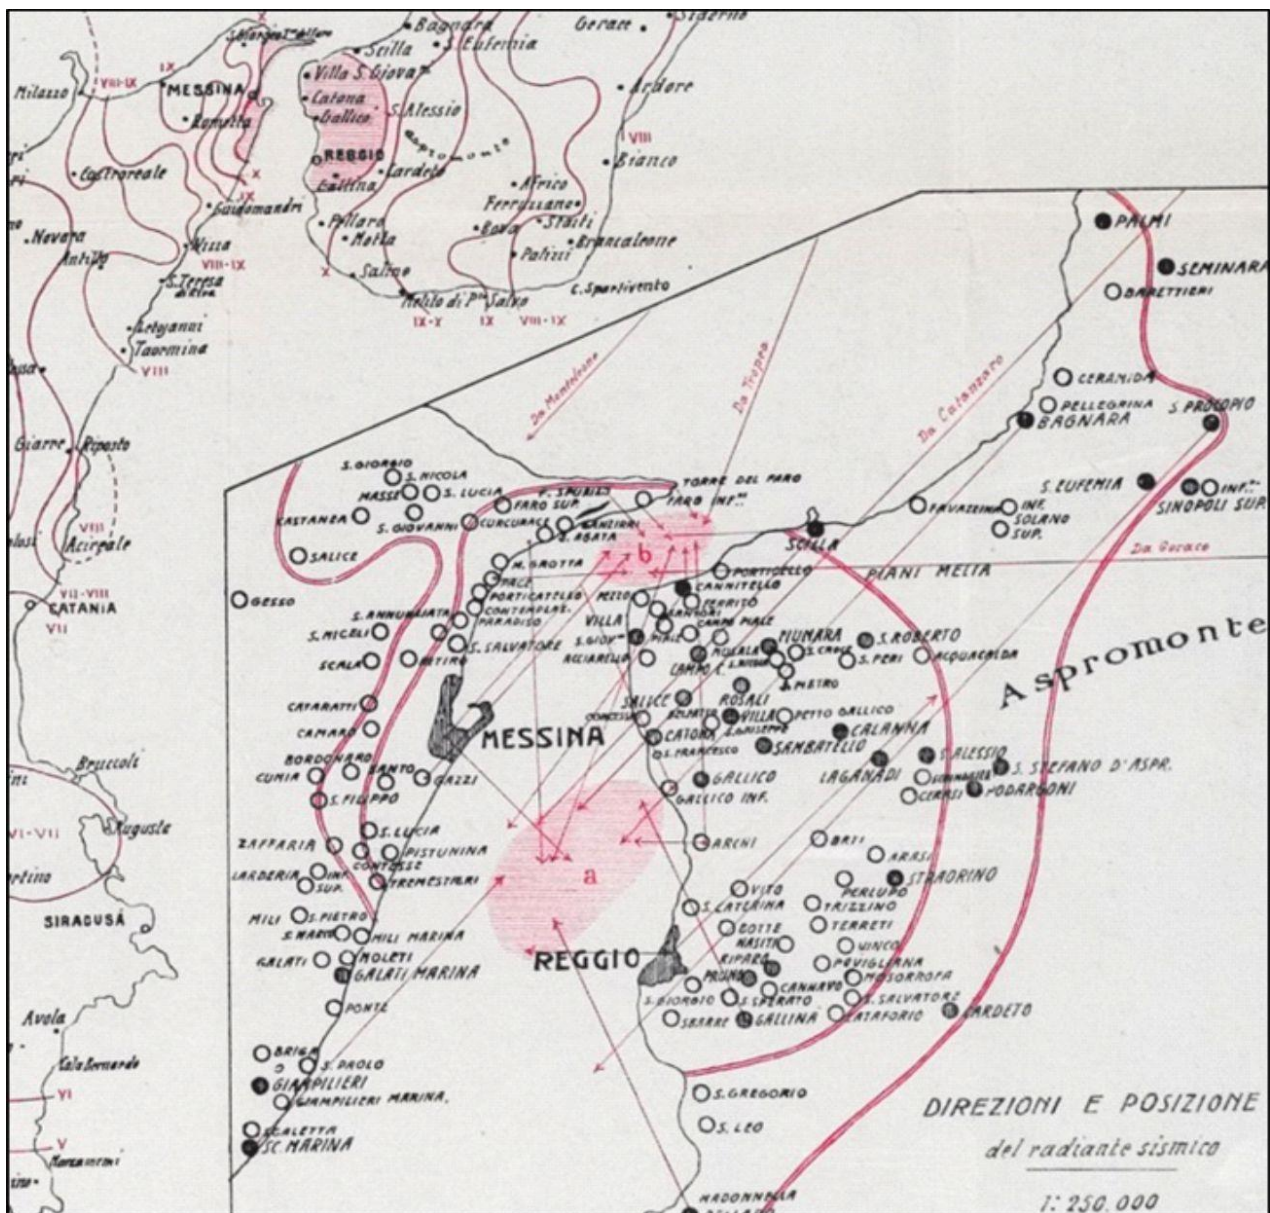

Figure S15. Macroseismic intensity trend according to Baratta (1910). The area of maximum damage has a semicircular shape and affects both side of the Messina Strait, more developed in Calabria. The two pink areas indicated with "a" and "b" are identified by Bar-atta as "centers of shaking", primary and secondary respectively. He obtained them through observations on the direction of the shock with the method originally proposed by Robert Mallet.



# TIME-SPACE EVOLUTION OF HISTORICAL-PARAMETRICAL EARTHQUAKES

**Table S13. List of historical earthquakes in southern Calabria (CPTI15 v4.0 from 1172 to 2020 with  $M_w \geq 5.5$ ).**

| <b>Id</b> | <b>Date</b> | <b>Epicentral</b>           | <b>Mw</b> | <b>MdpN</b> | <b>Io</b> |
|-----------|-------------|-----------------------------|-----------|-------------|-----------|
| 01        | 26/9/1172   | Messina                     | 5.60      | 1           | 8         |
| 02        | 24/5/1184   | Valle del Crati             | 6.80      | 6           | 9         |
| 03        | 25/2/1509   | Stretto di Messina          | 5.60      | 4           | 8         |
| 04        | 20/7/1609   | Calabria centrale           | 5.80      | 5           | 8-9       |
| 05        | 25/8/1613   | Monti Nebrodi               | 5.60      | 2           | 8         |
| 06        | 4/4/1626    | Calabria centrale           | 6.10      | 7           | 9         |
| 07        | 8/6/1638    | Crotonese                   | 6.80      | 213         | 11        |
| 08        | 27/3/1638   | Calabria centrale           | 7.10      | 41          | 10        |
| 09        | 19/6/1640   | Calabria centrale           | 5.80      | 3           | 8-9       |
| 10        | 5/11/1659   | Calabria centrale           | 6.60      | 126         | 10        |
| 11        | 26/1/1708   | Pollino                     | 5.60      | 7           | 8         |
| 12        | 7/12/1743   | Calabria centrale           | 5.90      | 27          | 8-9       |
| 13        | 21/3/1744   | Sila Piccola                | 5.70      | 29          | 8         |
| 14        | 0/8/1749    | Messina                     | 5.80      | 1           | 8-9       |
| 15        | 14/7/1767   | Valle del Crati             | 5.90      | 8           | 8-9       |
| 16        | 28/3/1780   | Sicilia nord-orientale      | 5.50      | 10          | 7-8       |
| 17        | 5/2/1783    | Calabria meridionale        | 7.10      | 356         | 11        |
| 18        | 6/2/1783    | Stretto di Messina          | 6.20      | 8           | 9-10      |
| 19        | 7/2/1783    | Calabria centrale           | 6.70      | 191         | 10-11     |
| 20        | 1/3/1783    | Calabria centrale           | 5.90      | 18          | 9-10      |
| 21        | 28/3/1783   | Calabria centrale           | 7.00      | 323         | 11        |
| 22        | 10/3/1786   | Golfo di Patti              | 6.10      | 10          | 9         |
| 23        | 13/10/1791  | Calabria centrale           | 6.10      | 76          | 9         |
| 24        | 8/3/1832    | Crotonese                   | 6.70      | 99          | 10        |
| 25        | 12/10/1835  | Cosentino                   | 5.90      | 36          | 9         |
| 26        | 25/4/1836   | Calabria settentrionale     | 6.20      | 44          | 9         |
| 27        | 12/2/1854   | Cosentino                   | 6.30      | 89          | 10        |
| 28        | 4/10/1870   | Cosentino                   | 6.20      | 54          | 9-10      |
| 29        | 6/3/1886    | Cosentino                   | 5.60      | 10          | 7-8       |
| 30        | 3/12/1887   | Calabria settentrionale     | 5.60      | 142         | 8         |
| 31        | 16/11/1894  | Calabria meridionale        | 6.10      | 303         | 9         |
| 32        | 8/9/1905    | Calabria centrale           | 7.00      | 895         | 10-11     |
| 33        | 23/10/1907  | Aspromonte                  | 6.00      | 274         | 8-9       |
| 34        | 28/12/1908  | Stretto di Messina          | 7.10      | 772         | 11        |
| 35        | 1/7/1909    | Stretto di Messina          | 5.50      | 35          | 8         |
| 36        | 28/6/1913   | Calabria settentrionale     | 5.60      | 151         | 8         |
| 37        | 7/3/1928    | Calabria centro-meridionale | 5.90      | 30          | 7-8       |
| 38        | 2/1/1932    | Ionio settentrionale        | 5.50      | 16          | 5         |
| 39        | 11/5/1947   | Calabria centrale           | 5.70      | 254         | 8         |
| 40        | 15/4/1978   | Golfo di Patti              | 6.00      | 330         | 8         |

**Keys:** **Mw:** Equivalent Magnitude; **MDP:** Macroseismic Data Points; **Io:** Epicentral Intensity.

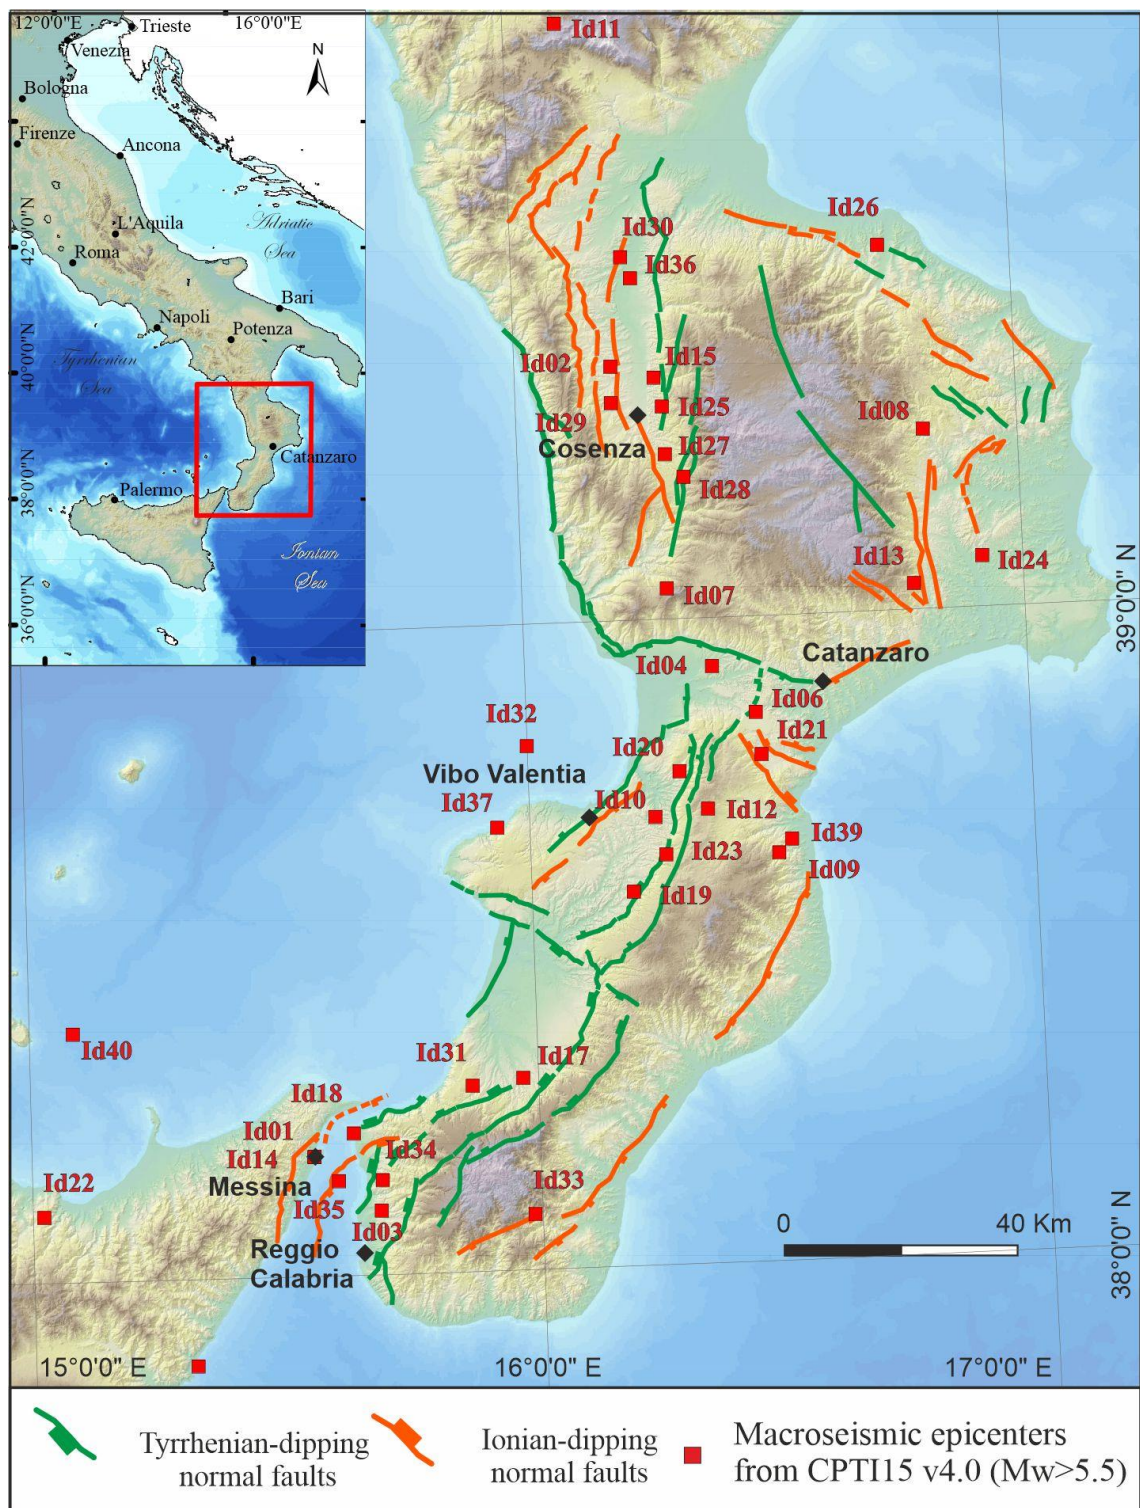

**Figure S16.** Map of historical earthquakes in the CPTI15 [1] catalog related to earthquakes occurring in the study area from 1172 to 2020 having  $\geq 5.5$ .

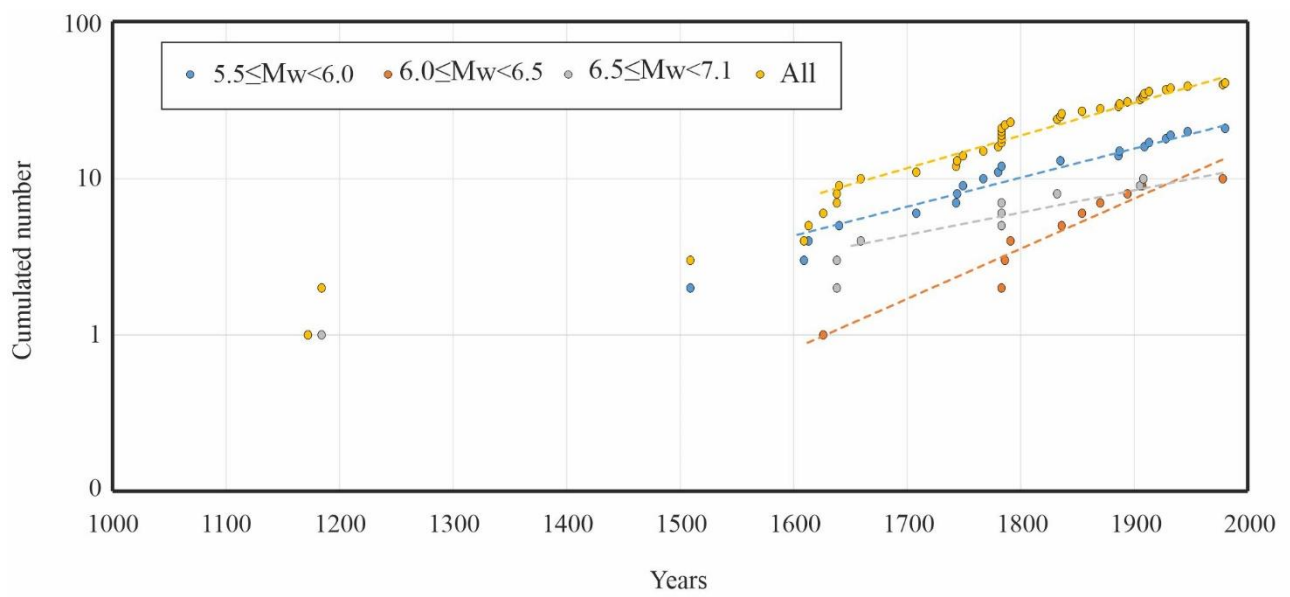

**Figure S17.** Time-completeness graph for the earthquakes listed in Table S13 with magnitude  $M_w \geq 5.5$  occurring in the Southern Calabria from 1172 to 2020.

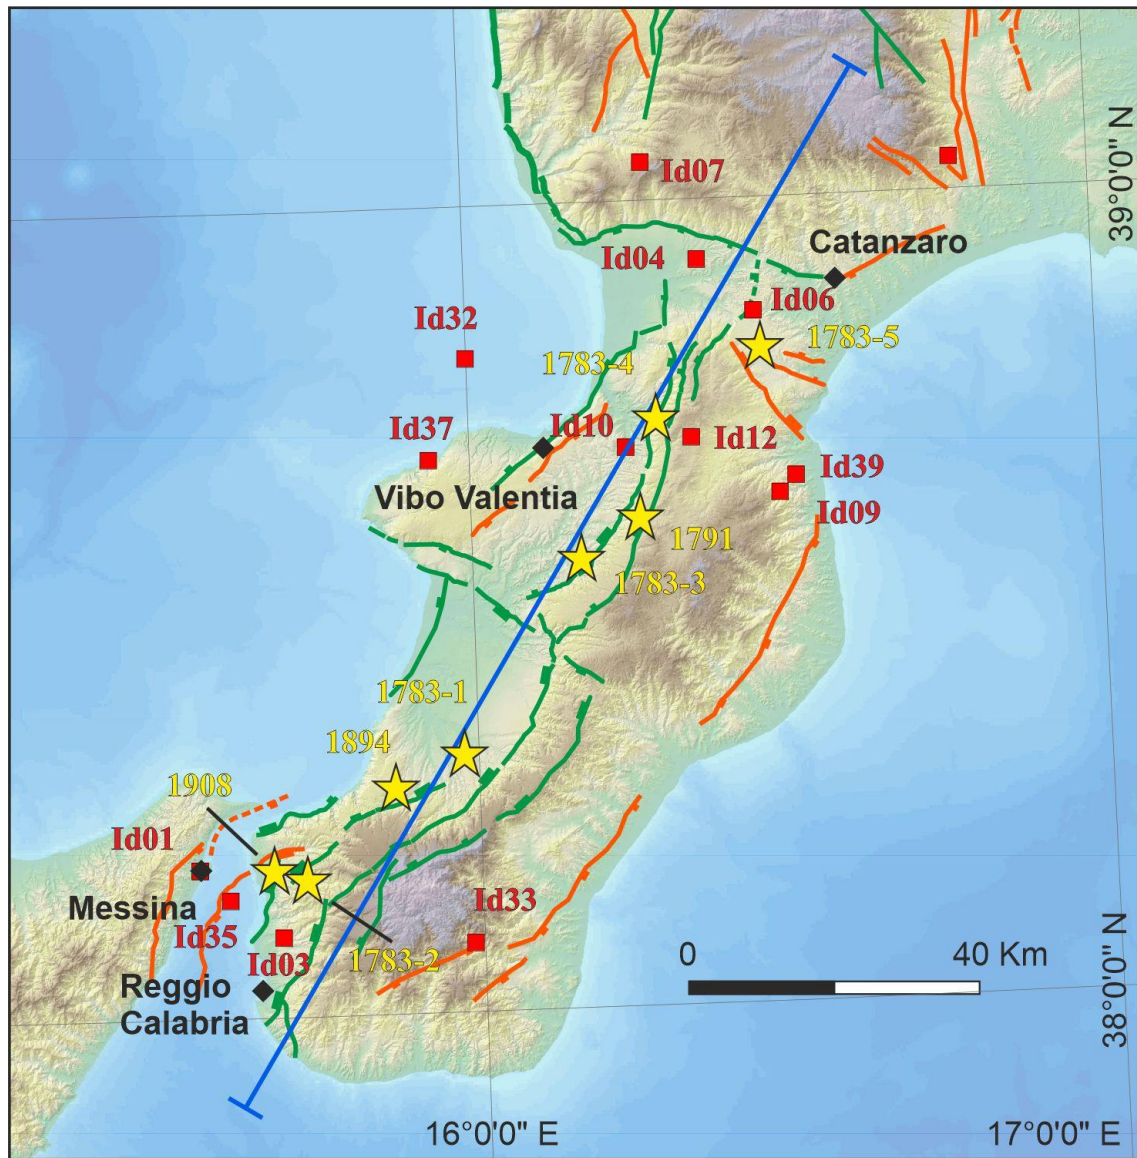

**Figure S18.** Map of historical earthquakes used for the Space-time diagram (see Fig. 10 in main paper).



**Table S14. Elliptical source parameters of the historical earthquakes used for space-time evolution analysis for southern Calabria.**

| <b>Id</b> | <b>Date</b> | <b>Epicentral</b>           | <b>Mw</b> | <b>MdpN</b> | <b>Io</b> | <b>Displacement<br/>[m]</b> | <b>Area<br/>(Km<sup>2</sup>)</b> | <b>Length<br/>(Km)</b> | <b>Width<br/>(Km)</b> | <b>Reference</b> |
|-----------|-------------|-----------------------------|-----------|-------------|-----------|-----------------------------|----------------------------------|------------------------|-----------------------|------------------|
| 04        | 20/7/1608   | Calabria centrale           | 5.8       | 5           | 8-9       | 0.27                        | 69.27                            | 9.80                   | 9.00                  | CPTI14           |
| 06        | 4/4/1626    | Calabria centrale           | 6.1       | 7           | 9         | 0.4                         | 131.88                           | 14.54                  | 11.55                 | CPTI14           |
| 08        | 27/3/1638   | Calabria centrale           | 7.1       | 41          | 10        | 1.45                        | 1154.25                          | 55.24                  | 26.61                 | CPTI14           |
| 09        | 19/6/1640   | Calabria centrale           | 5.8       | 3           | 8-9       | 0.27                        | 69.27                            | 9.80                   | 9.00                  | CPTI14           |
| 10        | 5/11/1659   | Calabria centrale           | 6.6       | 126         | 10        | 0.78                        | 380.76                           | 28.03                  | 17.30                 | CPTI14           |
| 12        | 7/12/1743   | Calabria centrale           | 5.9       | 27          | 8-9       | 0.31                        | 85.19                            | 11.14                  | 9.74                  | CPTI14           |
| 14        | 0/8/1749    | Messina                     | 5.8       | 1           | 8-9       | 0.27                        | 69.27                            | 9.80                   | 9.00                  | CPTI14           |
| 1783-1    | 5/2/1783    | Southern Calabria           | 6.56      | 215         | 10-11     | 0.74                        | 350.69                           | 26.61                  | 16.78                 | This paper       |
|           |             |                             | 6.57      | 152         | 10-11     | 0.75                        | 357.98                           | 26.96                  | 16.91                 |                  |
| 1783-2    | 6/2/1783    | Messina                     | 6.22      | 81          | 9         | 0.46                        | 171.65                           | 17.07                  | 12.81                 | This paper       |
| 1783-3    | 7/2/1783    | Central Calabria            | 6.67      | 227         | 10-11     | 0.81                        | 467.36                           | 31.65                  | 18.80                 | This paper       |
| 1783-4    | 1/3/1783    | Central Calabria            | 6         | 21          | 8-9       | 0.35                        | 105.96                           | 12.72                  | 10.60                 | This paper       |
| 1783-5    | 28/3/1783   | Central Calabria            | 6.81      | 336         | 10-11     | 0.98                        | 623.92                           | 37.89                  | 20.97                 | This paper       |
| 1791      | 13/10/1791  | Central Calabria            | 5.89      | 76          | 8-9       | 0.30                        | 84.86                            | 11.09                  | 9.74                  | This paper       |
| 1894      | 16/11/1894  | Southern Calabria           | 6.08      | 302         | 9         | 0.39                        | 126.23                           | 14.16                  | 11.35                 | This paper       |
| 32        | 8/9/1905    | Calabria centrale           | 7         | 895         | 10-11     | 1.28                        | 920.78                           | 47.86                  | 24.50                 | CPTI14           |
| 33        | 23/10/1907  | Aspromonte                  | 6         | 274         | 8-9       | 0.35                        | 105.96                           | 12.72                  | 10.60                 | CPTI14           |
| 1908      | 28/12/1908  | Messina                     | 6.6       | 497         | 10-11     | 0.78                        | 380.76                           | 28.03                  | 17.30                 | This paper       |
|           |             |                             | 6.5       | 317         | 10-11     | 0.68                        | 310.04                           | 24.61                  | 16.04                 |                  |
| 35        | 1/7/1909    | Stretto di Messina          | 5.5       | 35          | 8         | 0.21                        | 32.20                            | 6.20                   | 6.61                  | CPTI14           |
| 37        | 7/3/1928    | Calabria centro-meridionale | 5.9       | 30          | 7-8       | 0.31                        | 85.19                            | 11.14                  | 9.74                  | CPTI14           |
| 39        | 11/5/1947   | Calabria centrale           | 5.7       | 254         | 8         | 0.27                        | 49.66                            | 8.10                   | 7.81                  | CPTI14           |
| 40        | 15/04/1978  | Golfo di Patti              | 6         | 330         | 8         | 0.35                        | 105.96                           | 12.72                  | 10.60                 | CPTI14           |

**Keys:** **Mw:** Equivalent Magnitude; **MDP:** Macroseismic Data Points; **Io:** Epicentral Intensity. **Area, Length, Width:** Geometric parameters of elliptical seismic sources. Displacement is calculated from the value of the seismic moment using the Hanks and Kanamori's (1979) formulas.
