# Supplementary material for: Reappraisal and Analysis of Macroseismic Data for Seismotectonic Purposes: The Strong Earthquakes of Southern Calabria, Italy
Source: MDPI journal article supplement (doi:10.3390/geosciences13070212), 2023-07-14
Supplement: s1 [file s1]

## Supplementary Data 2 for:

# Reappraisal and analysis of macroseismic data for seismotectonic purposes: the Southern Calabria strong earthquakes (Italy)

Carlo Andrenacci<sup>1,2</sup>, Simone Bello<sup>1,2\*</sup>, Maria Serafina Barbano<sup>2,3,4</sup>, Rita de Nardis<sup>1,2</sup>, Claudia Pirrotta<sup>2,3</sup>, Federico Pietrolungo<sup>1,2</sup> and Giusy Lavecchia<sup>1,2</sup>

<sup>1</sup>DiSPuTer, University G. d'Annunzio, via dei Vestini 31, Chieti 66100, Italy;

<sup>2</sup>CRUST - Interuniversity Center for 3D Seismotectonics with Territorial Applications 66100, Chieti, Italy;

<sup>3</sup>Dipartimento di Scienze Biologiche, Geologiche e Ambientali, Università di Catania, 95129 Catania, Italy;

<sup>4</sup>Istituto Nazionale di Geofisica e Vulcanologia, (INGV) Catania, Italy

\*Correspondence: [simone.bello@unich.it](mailto:simone.bello@unich.it)

This Supporting Data file contains the following information:

|                                                                                            |           |
|--------------------------------------------------------------------------------------------|-----------|
| <b>1783 (Mw 6.84) CENTRAL-SOUTHERN CALABRIA SEISMIC SEQUENCE (Table S1)</b>                | <b>2</b>  |
| Description.....                                                                           | 2         |
| Historical evidence of coseismic effects, reports and sources.....                         | 3         |
| Main historical sources.....                                                               | 5         |
| <b>1791 (Mw 5.89) CENTRAL- CALABRIA EARTHQUAKE (Table S2)</b>                              | <b>6</b>  |
| Description.....                                                                           | 6         |
| Historical evidence of coseismic effects, reports and sources.....                         | 6         |
| Main historical sources.....                                                               | 6         |
| <b>1894 (Mw 6.01) SOUTHERN- CALABRIA SEISMIC SEQUENCE (Table S3)</b>                       | <b>7</b>  |
| Description.....                                                                           | 7         |
| Historical evidence of coseismic effects, reports and sources.....                         | 7         |
| Main historical sources.....                                                               | 7         |
| <b>1908 (Mw 6.83) SOUTHERN-CALABRIA – NORTHERN SICILY (Table S4)</b>                       | <b>11</b> |
| Description.....                                                                           | 11        |
| Historical evidence of coseismic effects, reports and sources.....                         | 11        |
| Main historical sources.....                                                               | 12        |
| <b>(Table S5) MACROSEISMIC FIELD - 5 February 1783 (Mw 6.84)</b>                           | <b>14</b> |
| <b>(Table S6) MACROSEISMIC FIELD - 6 February 1783 (Mw 6.22)</b>                           | <b>20</b> |
| <b>(Table S7) MACROSEISMIC FIELD - 7 February 1783 (Mw 6.67)</b>                           | <b>22</b> |
| <b>(Table S8) MACROSEISMIC FIELD - 1 March 1783 (Mw 6.0)</b>                               | <b>26</b> |
| <b>(Table S9) MACROSEISMIC FIELD - 28 March 1783 (Mw 6.81)</b>                             | <b>27</b> |
| <b>(Table S10) MACROSEISMIC FIELD - 1791 (Mw 5.89) CENTRAL-CALABRIA EARTHQUAKE</b>         | <b>33</b> |
| <b>(Table S11) MACROSEISMIC FIELD - 1894 (Mw 6.08) SOUTHERN- CALABRIA SEISMIC SEQUENCE</b> | <b>35</b> |
| <b>(Table S12) MACROSEISMIC FIELD - 1908 (Mw 6.83) SOUTHERN-CALABRIA – NORTHERN SICILY</b> | <b>40</b> |

| <b>Table S1</b><br><b>1783 (Mw 6.84) CENTRAL-SOUTHERN CALABRIA SEISMIC SEQUENCE</b>                                                                                                                                                                                                                                                                                                                                                                                                                                                                                                                                                                                                                                                                                                                                                                                                                                                                                                                                                                                                                                                                                                                                                                                                                                                                                                                                                                                                                                                                                                                                                                                                                                                                                                                                                                                                                                                                                                                                                                                                                                                                                                                                                                                                                                                                                                                                                                                                                                                                                                                                                                                                                                                                                                                                                                                                                                                                                                                                                                                                                                    |                                  |                                                                                                                                                                                                                                                                                                                                                                                                                                                                                                                                                                                                                                                                                                                                                                                                                                             |                                                                                                                                                                                                                                                                                                                                                                                                                                                                                                                                                                                                                                                                                                                                                                                                                  |                                                                      |
|------------------------------------------------------------------------------------------------------------------------------------------------------------------------------------------------------------------------------------------------------------------------------------------------------------------------------------------------------------------------------------------------------------------------------------------------------------------------------------------------------------------------------------------------------------------------------------------------------------------------------------------------------------------------------------------------------------------------------------------------------------------------------------------------------------------------------------------------------------------------------------------------------------------------------------------------------------------------------------------------------------------------------------------------------------------------------------------------------------------------------------------------------------------------------------------------------------------------------------------------------------------------------------------------------------------------------------------------------------------------------------------------------------------------------------------------------------------------------------------------------------------------------------------------------------------------------------------------------------------------------------------------------------------------------------------------------------------------------------------------------------------------------------------------------------------------------------------------------------------------------------------------------------------------------------------------------------------------------------------------------------------------------------------------------------------------------------------------------------------------------------------------------------------------------------------------------------------------------------------------------------------------------------------------------------------------------------------------------------------------------------------------------------------------------------------------------------------------------------------------------------------------------------------------------------------------------------------------------------------------------------------------------------------------------------------------------------------------------------------------------------------------------------------------------------------------------------------------------------------------------------------------------------------------------------------------------------------------------------------------------------------------------------------------------------------------------------------------------------------------|----------------------------------|---------------------------------------------------------------------------------------------------------------------------------------------------------------------------------------------------------------------------------------------------------------------------------------------------------------------------------------------------------------------------------------------------------------------------------------------------------------------------------------------------------------------------------------------------------------------------------------------------------------------------------------------------------------------------------------------------------------------------------------------------------------------------------------------------------------------------------------------|------------------------------------------------------------------------------------------------------------------------------------------------------------------------------------------------------------------------------------------------------------------------------------------------------------------------------------------------------------------------------------------------------------------------------------------------------------------------------------------------------------------------------------------------------------------------------------------------------------------------------------------------------------------------------------------------------------------------------------------------------------------------------------------------------------------|----------------------------------------------------------------------|
| Description                                                                                                                                                                                                                                                                                                                                                                                                                                                                                                                                                                                                                                                                                                                                                                                                                                                                                                                                                                                                                                                                                                                                                                                                                                                                                                                                                                                                                                                                                                                                                                                                                                                                                                                                                                                                                                                                                                                                                                                                                                                                                                                                                                                                                                                                                                                                                                                                                                                                                                                                                                                                                                                                                                                                                                                                                                                                                                                                                                                                                                                                                                            |                                  |                                                                                                                                                                                                                                                                                                                                                                                                                                                                                                                                                                                                                                                                                                                                                                                                                                             |                                                                                                                                                                                                                                                                                                                                                                                                                                                                                                                                                                                                                                                                                                                                                                                                                  |                                                                      |
| <p>In Calabria and in northeastern Sicily a devastating seismic sequence started on 5 February 1783 and was followed by a long series of earthquakes that migrated from the Messina Strait toward NNE, along the axis of the Calabrian Arc. The aftershocks lasted for about ten years. More than 180 localities were destroyed or partially collapsed and there were more than 30,000 victims. The 5 February shock occurred at 19.10 Italian time (12.10 GMT) with a felt area extended from the Sicily to southern Italy (e.g. Guidoboni et al., 2018). The area with the strongest effects is located in the Tyrrhenian side of the Calabrian Apennines, a region corresponding to the Aspromonte and Gioia Tauro Plains. The February 6 earthquake, which occurred at 7.30 Italian time (00.20 GMT), is known above all for the tsunami that struck Scilla and Torre Faro (e.g. Graziani et al., 2006), whereas it seems strongest that is usually considered. Nevertheless, several historical sources describe this shock as violent as the previous one but of lesser duration than the first. This earthquake was the one that mainly caused damage in Messina and in some nearby towns and villages, and in Reggio (8-9 EMS). The epicentre of this quake is located between Reggio Calabria and Scilla. The next day shock on 7 February, at 20.30 Italian time (13.10 GMT), moved to a north-easterly direction compared to the one of previous earthquakes, towards the Mesima valley on the Tyrrhenian side of the Serre chain (IEMS = 10-11). Most of the localities were already damaged by previously shocks. The fourth big earthquake of 1 March - at 08.30 Italian time (01.40 GMT) was preceded by a shock on 27 February (I = 6-7), located northernmost. It caused lesions to country buildings between the Angitola river and Cape Origliano (Girafalco, Borgia and Francavilla Angitola), and was strongly felt in Catanzaro (De Leone, 1783; Grimaldi, 1784), Castelmonardo (nowadays Nuova Filadelfia) (De Rossi, 1889), Santa Sofia (Masci, 1783) and largely observed in Monteleone. The 1 March shock was felt in a wide region between Messina and Scalea, the area of the maximum effects (IEMS = 9) moved further north, along the Apennines. The most affected villages were: Polia (nowaday Trecroci), Poliolo, Castelmonardo and Francavilla Angitola. The quake on 28 March (IEMS = 10-11) was felt throughout southern Italy. The most affected area is located in the Catanzaro basin, with damages both in the Ionian and in the Tyrrhenian side (Fig. 7S). It is the northernmost greatly damaged area of the entire seismic period. On April 26 and 27, two shocks (intensity 7 and 6.5, respectively) damaged some quarters in Milazzo (Vivenzio, 1783), which had not been significantly hit by the previous shocks. Finally, on 30 July a strong shock (Fig. 5Sd) caused moderate damage in Gerace (I = 7) (Mercalli, 1897), Catanzaro (I = 6) Reggio Calabria (I = 6) and Cinquefrondi (I = 6) and was strongly felt in Monteleone (I = 5) as well (Vivenzio, 1783).</p> |                                  |                                                                                                                                                                                                                                                                                                                                                                                                                                                                                                                                                                                                                                                                                                                                                                                                                                             |                                                                                                                                                                                                                                                                                                                                                                                                                                                                                                                                                                                                                                                                                                                                                                                                                  |                                                                      |
| Historical evidence of coseismic effects, reports and sources                                                                                                                                                                                                                                                                                                                                                                                                                                                                                                                                                                                                                                                                                                                                                                                                                                                                                                                                                                                                                                                                                                                                                                                                                                                                                                                                                                                                                                                                                                                                                                                                                                                                                                                                                                                                                                                                                                                                                                                                                                                                                                                                                                                                                                                                                                                                                                                                                                                                                                                                                                                                                                                                                                                                                                                                                                                                                                                                                                                                                                                          |                                  |                                                                                                                                                                                                                                                                                                                                                                                                                                                                                                                                                                                                                                                                                                                                                                                                                                             |                                                                                                                                                                                                                                                                                                                                                                                                                                                                                                                                                                                                                                                                                                                                                                                                                  |                                                                      |
| Event                                                                                                                                                                                                                                                                                                                                                                                                                                                                                                                                                                                                                                                                                                                                                                                                                                                                                                                                                                                                                                                                                                                                                                                                                                                                                                                                                                                                                                                                                                                                                                                                                                                                                                                                                                                                                                                                                                                                                                                                                                                                                                                                                                                                                                                                                                                                                                                                                                                                                                                                                                                                                                                                                                                                                                                                                                                                                                                                                                                                                                                                                                                  | Location                         | Evidence (in original language)                                                                                                                                                                                                                                                                                                                                                                                                                                                                                                                                                                                                                                                                                                                                                                                                             | Evidence (translated)                                                                                                                                                                                                                                                                                                                                                                                                                                                                                                                                                                                                                                                                                                                                                                                            | Source                                                               |
| 5.02.1783<br>(South Calabria)                                                                                                                                                                                                                                                                                                                                                                                                                                                                                                                                                                                                                                                                                                                                                                                                                                                                                                                                                                                                                                                                                                                                                                                                                                                                                                                                                                                                                                                                                                                                                                                                                                                                                                                                                                                                                                                                                                                                                                                                                                                                                                                                                                                                                                                                                                                                                                                                                                                                                                                                                                                                                                                                                                                                                                                                                                                                                                                                                                                                                                                                                          | Ganzirri                         | <i>“Aperture del terreno con fuoriuscita d'acqua”</i>                                                                                                                                                                                                                                                                                                                                                                                                                                                                                                                                                                                                                                                                                                                                                                                       | “Ground openings with water leaking”                                                                                                                                                                                                                                                                                                                                                                                                                                                                                                                                                                                                                                                                                                                                                                             | Baratta, 1910                                                        |
|                                                                                                                                                                                                                                                                                                                                                                                                                                                                                                                                                                                                                                                                                                                                                                                                                                                                                                                                                                                                                                                                                                                                                                                                                                                                                                                                                                                                                                                                                                                                                                                                                                                                                                                                                                                                                                                                                                                                                                                                                                                                                                                                                                                                                                                                                                                                                                                                                                                                                                                                                                                                                                                                                                                                                                                                                                                                                                                                                                                                                                                                                                                        | Messina                          | (?)                                                                                                                                                                                                                                                                                                                                                                                                                                                                                                                                                                                                                                                                                                                                                                                                                                         | “Regarding the great Messina earthquakes (1783) a great number of crater-like sink holes appeared in the wet depressions of the Mesima plain ... the bank of the Jeropotamo collapsed and a tremendous crack opened from the Sirocco, i.e. the south, to the Mistral, i.e. the north, and the downside has subsided with the rest of the Mesima plain”.                                                                                                                                                                                                                                                                                                                                                                                                                                                          | Relazione storico-fisica, 1783;<br>Gallo, 1784;<br>Torcia, 1784.     |
|                                                                                                                                                                                                                                                                                                                                                                                                                                                                                                                                                                                                                                                                                                                                                                                                                                                                                                                                                                                                                                                                                                                                                                                                                                                                                                                                                                                                                                                                                                                                                                                                                                                                                                                                                                                                                                                                                                                                                                                                                                                                                                                                                                                                                                                                                                                                                                                                                                                                                                                                                                                                                                                                                                                                                                                                                                                                                                                                                                                                                                                                                                                        |                                  | <i>“...si abbassò in più di un luogo il terreno”</i>                                                                                                                                                                                                                                                                                                                                                                                                                                                                                                                                                                                                                                                                                                                                                                                        | “...the ground was lowered in more than one place”                                                                                                                                                                                                                                                                                                                                                                                                                                                                                                                                                                                                                                                                                                                                                               | Relazione storico-fisica, 1783                                       |
|                                                                                                                                                                                                                                                                                                                                                                                                                                                                                                                                                                                                                                                                                                                                                                                                                                                                                                                                                                                                                                                                                                                                                                                                                                                                                                                                                                                                                                                                                                                                                                                                                                                                                                                                                                                                                                                                                                                                                                                                                                                                                                                                                                                                                                                                                                                                                                                                                                                                                                                                                                                                                                                                                                                                                                                                                                                                                                                                                                                                                                                                                                                        |                                  | <i>“...le medesime fenditure si vedono ancora nelle vicine colline presso alle loro cime”</i>                                                                                                                                                                                                                                                                                                                                                                                                                                                                                                                                                                                                                                                                                                                                               | "...the same cracks can still be seen in the nearby hills near their peaks"                                                                                                                                                                                                                                                                                                                                                                                                                                                                                                                                                                                                                                                                                                                                      | Gallo, 1784                                                          |
|                                                                                                                                                                                                                                                                                                                                                                                                                                                                                                                                                                                                                                                                                                                                                                                                                                                                                                                                                                                                                                                                                                                                                                                                                                                                                                                                                                                                                                                                                                                                                                                                                                                                                                                                                                                                                                                                                                                                                                                                                                                                                                                                                                                                                                                                                                                                                                                                                                                                                                                                                                                                                                                                                                                                                                                                                                                                                                                                                                                                                                                                                                                        |                                  | <i>“Si aperse con lunghe fenditure il suolo, si abbassò in più di un luogo il terreno, si ruppero le Montagne vicine alla Città”</i>                                                                                                                                                                                                                                                                                                                                                                                                                                                                                                                                                                                                                                                                                                        | "The ground was opened with long cracks and was lowered in more than one place, the mountains near the city were broken"                                                                                                                                                                                                                                                                                                                                                                                                                                                                                                                                                                                                                                                                                         | Gallo, 1783                                                          |
|                                                                                                                                                                                                                                                                                                                                                                                                                                                                                                                                                                                                                                                                                                                                                                                                                                                                                                                                                                                                                                                                                                                                                                                                                                                                                                                                                                                                                                                                                                                                                                                                                                                                                                                                                                                                                                                                                                                                                                                                                                                                                                                                                                                                                                                                                                                                                                                                                                                                                                                                                                                                                                                                                                                                                                                                                                                                                                                                                                                                                                                                                                                        |                                  | <i>“Anzi nello stesso suolo di Messina sono comparse in tutta la spiaggia del porto non vulgari aperture. Simili eventi si sono pure osservati nelle campagne, che le stanno dintorno; anche nel terreno all’interno della città, nella Cittadella e nella fortezza del Salvatore si aprirono molte fenditure. La Terra parimenti nel smemorato luogo marittimo si veduta abbassare alquanto, talché vi rimasta la Pescheria immersa tutta nell’onde”.</i>                                                                                                                                                                                                                                                                                                                                                                                  | “In the same territory of Messina, openings have appeared throughout the beach of the port. Similar events have also been observed in the surrounding countryside; also in the ground inside the city, in the Cittadella and in the Salvatore fortress, many cracks were opened. The Earth likewise in the maritime place was seen to lower somewhat, so that the fish market remained immersed all in the waves”.                                                                                                                                                                                                                                                                                                                                                                                               | Corrao, 1784                                                         |
|                                                                                                                                                                                                                                                                                                                                                                                                                                                                                                                                                                                                                                                                                                                                                                                                                                                                                                                                                                                                                                                                                                                                                                                                                                                                                                                                                                                                                                                                                                                                                                                                                                                                                                                                                                                                                                                                                                                                                                                                                                                                                                                                                                                                                                                                                                                                                                                                                                                                                                                                                                                                                                                                                                                                                                                                                                                                                                                                                                                                                                                                                                                        | Torre del Faro                   | <i>“Ricordo a questo proposito che anche nel periodo sismico del 1783 si erano determinate nei pressi del Pantano delle fenditure, ed altre pure si sono aperte anche nel terremoto del 1894”.</i>                                                                                                                                                                                                                                                                                                                                                                                                                                                                                                                                                                                                                                          | “In this regard, I remember that even in the seismic period of 1783, cracks were established near the Pantano, and others also opened in the earthquake of 1894”.                                                                                                                                                                                                                                                                                                                                                                                                                                                                                                                                                                                                                                                | Baratta, 1910-I parte                                                |
|                                                                                                                                                                                                                                                                                                                                                                                                                                                                                                                                                                                                                                                                                                                                                                                                                                                                                                                                                                                                                                                                                                                                                                                                                                                                                                                                                                                                                                                                                                                                                                                                                                                                                                                                                                                                                                                                                                                                                                                                                                                                                                                                                                                                                                                                                                                                                                                                                                                                                                                                                                                                                                                                                                                                                                                                                                                                                                                                                                                                                                                                                                                        | Naso                             | <i>“Una frana si staccò a poca distanza dall'abitato”</i>                                                                                                                                                                                                                                                                                                                                                                                                                                                                                                                                                                                                                                                                                                                                                                                   | "A landslide broke off a short distance from the town"                                                                                                                                                                                                                                                                                                                                                                                                                                                                                                                                                                                                                                                                                                                                                           | Corrao, 1784                                                         |
|                                                                                                                                                                                                                                                                                                                                                                                                                                                                                                                                                                                                                                                                                                                                                                                                                                                                                                                                                                                                                                                                                                                                                                                                                                                                                                                                                                                                                                                                                                                                                                                                                                                                                                                                                                                                                                                                                                                                                                                                                                                                                                                                                                                                                                                                                                                                                                                                                                                                                                                                                                                                                                                                                                                                                                                                                                                                                                                                                                                                                                                                                                                        | Rometta                          | <i>“Una frana si staccò dal monte di fronte al paese e il terreno raggiunse il fiume sottostante”.</i>                                                                                                                                                                                                                                                                                                                                                                                                                                                                                                                                                                                                                                                                                                                                      | "A landslide broke off the mountain in front of the town and reached the river below".                                                                                                                                                                                                                                                                                                                                                                                                                                                                                                                                                                                                                                                                                                                           | Romeo and Delfino, 1997; Corrao, 1784                                |
|                                                                                                                                                                                                                                                                                                                                                                                                                                                                                                                                                                                                                                                                                                                                                                                                                                                                                                                                                                                                                                                                                                                                                                                                                                                                                                                                                                                                                                                                                                                                                                                                                                                                                                                                                                                                                                                                                                                                                                                                                                                                                                                                                                                                                                                                                                                                                                                                                                                                                                                                                                                                                                                                                                                                                                                                                                                                                                                                                                                                                                                                                                                        | Santa Cristina d'Aspromonte (RC) | <i>“In molto luoghi si formarono spaccature nel terreno, nella parte alta del paese si aprì una lunga fenditura della larghezza di 2 palmi (50 cm)”</i>                                                                                                                                                                                                                                                                                                                                                                                                                                                                                                                                                                                                                                                                                     | “In many places cracks were formed in the ground, in the upper part of the town a long fissure with a width of 2 palms (50 cm) opened up”.                                                                                                                                                                                                                                                                                                                                                                                                                                                                                                                                                                                                                                                                       | Vivenzio, 1788<br>Sarconi, 1784<br>De Dolomieu, 1784<br>Galimi, 1783 |
|                                                                                                                                                                                                                                                                                                                                                                                                                                                                                                                                                                                                                                                                                                                                                                                                                                                                                                                                                                                                                                                                                                                                                                                                                                                                                                                                                                                                                                                                                                                                                                                                                                                                                                                                                                                                                                                                                                                                                                                                                                                                                                                                                                                                                                                                                                                                                                                                                                                                                                                                                                                                                                                                                                                                                                                                                                                                                                                                                                                                                                                                                                                        | Cinquefrondi (RC)                | <i>“Lungo il torrente Fosolano ed in diverse contrade delle campagne attorno al paese il terreno subì avvallamenti e frane; in contrada San Panto il terreno si aprì per una superficie di palmi quadrati 400 (28 mq) e profondità di palmi 120 (31 m); nella contrada de’ Fontanelli si formò una fenditura di palmi 200 (52 m) di lunghezza, palmi 20 (5,2 m) di larghezza e palmi 50 (13 m) di profondità; in contrada Giardinetto il terreno si squarciò per la superficie di palmi quadrati 1000 (70 mq) e palmi 200 (52 m) di altezza con la fuoriuscita di abbondante acqua; in località Pascatello venne notata una spaccatura lunga palmi 100 (26 m), larga palmi 30 (7,8 m) e profonda palmi 80 (20,8 m); in altra porzione di terreno si verificò una apertura larga palmi 4 (1 m), lunga e profonda palmi 60 (15,6 m) (1).”</i> | “Along the Fosolano stream and in various districts of the countryside around the town, the land underwent depressions and landslides; in the district of San Panto the ground opened up for a surface area of 400 square palms (28 m <sup>2</sup> ) and a depth of 120 palms (31 m); in the district of Fontanelli a fissure was formed 200 palms (52 m) long, 20 palms (5.2 m) wide and 50 palms (13 m) deep; in the Giardinetto district the land was ruptured for a surface area of 1000 square palms (70 m <sup>2</sup> ) and 200 palms (52 m) in height with the leakage of abundant water; in Pascatello a crack 100 palms long (26 m), 30 palms wide (7.8 m) and 80 palms deep (20.8 m) was noted; in another portion of land there was an opening 4 palms wide (1 m), 60 palms long and deep (15.6 m).” | Vivenzio, 1788                                                       |
|                                                                                                                                                                                                                                                                                                                                                                                                                                                                                                                                                                                                                                                                                                                                                                                                                                                                                                                                                                                                                                                                                                                                                                                                                                                                                                                                                                                                                                                                                                                                                                                                                                                                                                                                                                                                                                                                                                                                                                                                                                                                                                                                                                                                                                                                                                                                                                                                                                                                                                                                                                                                                                                                                                                                                                                                                                                                                                                                                                                                                                                                                                                        | Polistena (RC)                   | <i>"Notevoli furono gli effetti sui suoli: in contrada San Rocco si verificò una fenditura della lunghezza di un miglio (1850 m), larga palmi 100 (26 m) e profonda palmi 12 (3 m); a destra del fiume si aprì una grande fenditura con direzione sud-est e in molti punti i terreni risultarono notevolmente abbassati. In questi vi ha solo abbassamento in alcuni luoghi, in altri semplice elevazione, e in altri un capriccioso misto di terreno elevato, e di terreno depresso. Ma ciò, che fa l'importanza più notevole del fenomeno, si riduce a due articoli. Il primo riguarda una grave, e lunga</i>                                                                                                                                                                                                                             | "The effects on the soil were notable: in the San Rocco district there was a fissure one-mile-long (1850 m), 100 palms wide (26 m) and 12 palms deep (3 m); to the right of the river a large fissure in a south-easterly direction, and in many places the grounds were markedly subsided. In these there is only subsidence in some places, in others mere elevation, and in others a capricious mixture of high ground and low ground. But that, which makes the most notable importance of the phenomenon, is reduced to two articles. The first concerns a serious and long fissure in the ground, combined with the lowering                                                                                                                                                                               | Vivenzio, 1788<br>Sarconi, 1784<br>De Dolomieu, 1784<br>Botta, 1833  |

|  |                              |                                                                                                                                                                                                                                                                                                                                                                                                                                                                                                                                                                                                                                                                                                                                                                                                                                                                                                                                                                                                                                                                                                                                                                                                                                                                                                                                                                                                                                                                                                                                                                                                                                                                                                                                                                                                                                                                                                                                                                                          |                                                                                                                                                                                                                                                                                                                                                                                                                                                                                                                                                                                                                                                                                                                                                                                                                                                                                                                                                                                                                                                                                                                                                                                                                                                                                                                                                                                                                                                                                                                                                                                                                                                                                                                                                                                                                                                                                                                                                                                                   |                                                                        |
|--|------------------------------|------------------------------------------------------------------------------------------------------------------------------------------------------------------------------------------------------------------------------------------------------------------------------------------------------------------------------------------------------------------------------------------------------------------------------------------------------------------------------------------------------------------------------------------------------------------------------------------------------------------------------------------------------------------------------------------------------------------------------------------------------------------------------------------------------------------------------------------------------------------------------------------------------------------------------------------------------------------------------------------------------------------------------------------------------------------------------------------------------------------------------------------------------------------------------------------------------------------------------------------------------------------------------------------------------------------------------------------------------------------------------------------------------------------------------------------------------------------------------------------------------------------------------------------------------------------------------------------------------------------------------------------------------------------------------------------------------------------------------------------------------------------------------------------------------------------------------------------------------------------------------------------------------------------------------------------------------------------------------------------|---------------------------------------------------------------------------------------------------------------------------------------------------------------------------------------------------------------------------------------------------------------------------------------------------------------------------------------------------------------------------------------------------------------------------------------------------------------------------------------------------------------------------------------------------------------------------------------------------------------------------------------------------------------------------------------------------------------------------------------------------------------------------------------------------------------------------------------------------------------------------------------------------------------------------------------------------------------------------------------------------------------------------------------------------------------------------------------------------------------------------------------------------------------------------------------------------------------------------------------------------------------------------------------------------------------------------------------------------------------------------------------------------------------------------------------------------------------------------------------------------------------------------------------------------------------------------------------------------------------------------------------------------------------------------------------------------------------------------------------------------------------------------------------------------------------------------------------------------------------------------------------------------------------------------------------------------------------------------------------------------|------------------------------------------------------------------------|
|  |                              | <i>fenditura di terreno, unita all'abbassamento di terreno, staccandone la parte lacerata, e vibrandola di là dal resto, a cui trovavasi per naturale posizione unita; e ciò per la distanza di palmi 12 in circa ne' massimi tratti, e di minore distanza ne' tratti minori. In questa fenditura, e ne' terreni laterali era notevole che superiormente, e inferiormente gli argini non erano nello stesso livello: in alcuni spazi il terreno era visibilmente nabissato alla profondità di quasi 14 palmi: in molti era depresso inegualmente ove per quattro, ove per tre, e ove per due palmi: nel resto degli spazi gli argini erano nel loro livello naturale, senza avere sofferta la minima alterazione. Questa enorme fenditura va con direzione da scirocco a levante, e poi torce verso il greco. Comincia dal pié della collina, ov'erano i Cappuccini: s'inoltra per una parte della distrutta Chiesa, e del giardino de' medesimi: passa ad occupare il territorio di Donna Teresa Luciani, ove sta in parte situato l'acquidotto, di cui or ora parleremo; e quindi si estende con figura irregolare fino lungo il territorio, detto la Giuseppina, tagliandolo quasi a metà".</i>                                                                                                                                                                                                                                                                                                                                                                                                                                                                                                                                                                                                                                                                                                                                                                                       | of the ground, detaching the torn part, and vibrating it beyond the rest, in which it was found by natural position united, this for the distance of approximately 12 palms in the maximum portions, and of lesser distance in the smaller portions. In this fissure, and in the lateral terrains, it was notable that above and below, the embankments were not on the same level: in some spaces the land was visibly sunk to the depth of nearly fourteen palms: in many it was depressed unequally where by four, where by three, and where by two palms: in the rest of the spaces the embankments were at their natural level, without having suffered the slightest alteration. This huge fissure goes in a direction from Scirocco (SE) to Levante (E), and then twists towards the Grecale (NE). It begins at the foot of the hill, where the Capuchins were: it goes on through a part of the destroyed Church, and the garden of the same: it passes to occupy the territory of D. Teresa Luciani, where the aqueduct is partly located, of which now we will talk; and then extends with an irregular figure up to the territory, called the Giuseppina, cutting it almost in half".                                                                                                                                                                                                                                                                                                                                                                                                                                                                                                                                                                                                                                                                                                                                                                                                  |                                                                        |
|  | San Fili (RC)                | <i>"In contrada Campizzi di aprì una fenditura nel terreno lunga mezzo miglio (900 m), larga palmi 3 (78 cm) e profonda 2 palmi (52 cm); nel luogo detto Acqua Bianca si formò una spaccatura della lunghezza di mezzo miglio (900 m), di palmi 1 (26 cm) di larghezza e 2 palmi di profondità (52 cm) (1, 2)."</i>                                                                                                                                                                                                                                                                                                                                                                                                                                                                                                                                                                                                                                                                                                                                                                                                                                                                                                                                                                                                                                                                                                                                                                                                                                                                                                                                                                                                                                                                                                                                                                                                                                                                      | "In the Campizzi district a fissure opened in the ground half a mile long (900 m), 3 palmi wide (78 cm) and 2 palmi deep (52 cm); in the place called Acqua Bianca a fissure was formed half a mile long (900 m), 1 handbreadth (26 cm) wide and 2 handbreadths deep (52 cm)."                                                                                                                                                                                                                                                                                                                                                                                                                                                                                                                                                                                                                                                                                                                                                                                                                                                                                                                                                                                                                                                                                                                                                                                                                                                                                                                                                                                                                                                                                                                                                                                                                                                                                                                    | Vivenzio, 1788<br>Sarconi, 1784                                        |
|  | Terranova Sappo Minulio (RC) | <i>"Vi è prima uno squarcio, che ad angoli ineguali straccia, e parte in due il muro con legge tale, che la fenditura nel sito superiore è larga tre palmi, e un quarto, e nell'inferiore è appena un palmo. Vedesi poi che delle parti squarciate quella, che è la più orientale, appare come spinta, e incurvata verso l'est. E per contrario quella, che è più settentrionale, pende verso il sud; e lungi dall'apparire compressa, o intrusa nel terreno, ne sembra anzi così divelta, ed elevata da una forza espulsiva, e sotteranea, che molte porzioni delle fondamenta del muro sono allo scoperto, e veggonsi spinte fuori dalla interna cavità del suolo, ove giacquero in prima.....questa torre per la via del mezzogiorno inclina talmente, che pare disposta a rovesciarsi; così è facile a comprendersi nel distretto del suolo, che le serviva di base, come fieno avvenuti due moti contrarj, cioè l'uno di elevazione, e l'altro di depressione: il primo appare evidente in quella porzione di fabbrica, la quale è la più settentrionale, e che fu elevata fuori del suo cavo con tutta la sua radice, o sia fondamento; e 'l secondo si riconosce chiaramente non meno in quella, che è la più orientale, ma anche in tutta la rimanente parte, che pende a mezzogiorno, la quale è molto più bassa di livello di tutte le altre, e appare come intrusa, e profondata nel suolo. Il fatale genio di questi due moti opposti, con modo più distinto e singolare, si vede espresso nell'altro estremo sito di Terranova, ove trovavasi, come dicemmo, la chiesa di S.Caterina, e il monistero de' PP.Celestini, e propriamente nel cortile di questo, in cui vi era un pozzo ampio, e profondo. Nella collina si aprì una voragine di 500 piedi (150 m) di profondità e larga tre quarti di miglio (1400 m); scomparve l'acqua da tutte le fonti e da tutti i pozzi; larghe e profonde fenditure si verificarono in tutte le circostanti campagne (1, 2, 3, 4)."</i> | "First there is a gash, which tears the wall at unequal angles, and divides the wall in two with such a law, that the fissure in the upper site is three palms and a quarter wide, and in the lower one it is just a palm. It is seen then that of the torn parts, that which is more eastern appears to be thrust and curved towards the east, and conversely that which is more northerly leans towards the south, and far from appearing compressed or intruded into the ground, on the contrary, it seems so uprooted and raised by an expulsive and subterranean force, that many portions of the foundations of the wall are exposed, and are seen pushed out of the internal cavity in the ground, where they previously lay..... This tower for the southern road slopes so much that it seems disposed to overturn; thus it is easy to understand that the ground, which served it as a base, how two contrary motions occurred, namely one of elevation and the other of depression: the first appears evident in that portion of the building, which is the northernmost, and which was raised up out of its hollow with all its root, or foundation; and the latter is clearly recognized not less in that which is the most eastern, but also in the whole remaining part which leans towards the south, which is much lower in level than all the others, and appears as if it were intruded, and deep into the ground. The fatal genius of these two opposing movements, in a more distinct and singular way, is seen expressed in the other extreme site of Terranova, where, as we said, there was the church of S. Caterina, and the monastery of PP. Celestini, and properly in the courtyard of this, in which there was a large and deep well. A chasm opened in the hill 500 feet (150 m) deep and three-quarters of a mile (1400 m) wide; water disappeared from all sources and from all wells; large and deep fissures occurred throughout the surrounding countryside." | Hamilton, 1783<br>Vivenzio, 1788<br>Sarconi, 1784<br>De Dolomieu, 1784 |
|  | San Giorgio Morgeto (RC)     | <i>"Nel suolo si aprirono numerose fenditure: una in contrada Molinello di 2 miglia (3,7 km) di lunghezza, 6 palmi (1,5 m) di larghezza e 18 palmi (4,5 m) di profondità; una seconda fenditura si verificò nel luogo denominato Casignana lunga mezzo miglio (925 m), larga 3 palmi (78 cm) e profonda 8 palmi (2 m); in contrada Longo si aprì il terreno per la lunghezza di mezzo miglio (925 m), larghezza di 4 palmi (1 m) e profondità 8 palmi (2 m). Nelle località Bellagello e Cocali si verificò una frana con danni alle colture; in contrada Muscarà si innescò un fronte franoso ampio 30 palmi (8 m), che precipitò per 300 palmi (78 m)."</i>                                                                                                                                                                                                                                                                                                                                                                                                                                                                                                                                                                                                                                                                                                                                                                                                                                                                                                                                                                                                                                                                                                                                                                                                                                                                                                                            | "Numerous fissures opened up in the ground: one in the Molinello district 2 miles (3.7 km) long, 6 palmi (1.5 m) wide and 18 palmi (4.5 m) deep; a second fissure occurred in the place called Casignana half a mile long (925 m), 3 palmi wide (78 cm) and 8 palmi deep (2 m); in the Longo district the ground was opened for a length of half a mile (925 m), a width of 4 palmi (1 m) and depth 8 palmi (2 m). In the Bellagello and Cocali localities a landslide occurred with damage to crops; in the Muscarà district a landslide front 30 palmi (8 m) wide was triggered, which fell for 300 palmi ( 78m)."                                                                                                                                                                                                                                                                                                                                                                                                                                                                                                                                                                                                                                                                                                                                                                                                                                                                                                                                                                                                                                                                                                                                                                                                                                                                                                                                                                              | Vivenzio, 1788<br>Sarconi, 1784                                        |
|  | Plaesano (RC)                | <i>"Nel terreno si aprirono grandi fenditure. Una si verificò in località Samuele con lunghezza mezzo miglio (925 m), larghezza palmi 300 (78 m) e profondità palmi 30 (7,8 m); una seconda in contrada Fontana, lunga un miglio (1850 m), larga palmi 140 (37 m) e profonda palmi 40 (10.5 m); una terza frattura si aprì nel luogo detto Certzulle con lunghezza un miglio (1850 m), larghezza palmi 200 (52 m) e profondità palmi 150 (40 m); una quarta lunga un quarto di miglio (460 m), larga palmi 45 (12 m) e profonda palmi 300 (78 m) interessò il suolo in località Fortuna."</i>                                                                                                                                                                                                                                                                                                                                                                                                                                                                                                                                                                                                                                                                                                                                                                                                                                                                                                                                                                                                                                                                                                                                                                                                                                                                                                                                                                                            | "Large fissures opened up in the ground. One occurred in the Samuele locality with a length of half a mile (925 m), a width of 300 palms (78 m) and a depth of 30 palms (7.8 m); a second in the Fontana district, a mile long (1850 m), 140 palms wide (37 m) and 40 palms deep (10.5 m); a third fracture opened in the place called Certzulle with a length of one mile (1850 m), 200 palms wide (52 m) and 150 palms deep (40 m); a fourth one a quarter of a mile long (460 m), 45 palms wide (12 m) and 300 palms deep (78 m) affected the ground in Fortuna."                                                                                                                                                                                                                                                                                                                                                                                                                                                                                                                                                                                                                                                                                                                                                                                                                                                                                                                                                                                                                                                                                                                                                                                                                                                                                                                                                                                                                              | Vivenzio, 1788                                                         |

|                                 |                                         |                                                                                                                                                                                                                                                                                                                                                                               |                                                                                                                                                                                                                                                                                                                                                 |                                                                                                                                                                                 |
|---------------------------------|-----------------------------------------|-------------------------------------------------------------------------------------------------------------------------------------------------------------------------------------------------------------------------------------------------------------------------------------------------------------------------------------------------------------------------------|-------------------------------------------------------------------------------------------------------------------------------------------------------------------------------------------------------------------------------------------------------------------------------------------------------------------------------------------------|---------------------------------------------------------------------------------------------------------------------------------------------------------------------------------|
|                                 | Caridà (RC)                             | <i>"Si verificarono frane, sollevamenti ed abbassamenti del terreno con sradicamento di molti alberi. Trovammo di passo in passo frequenti rivolgimenti di terreni, col doppio fenomeno che in essi allo sbassamento osservammo unito l'innalzamento oltre al livello ordinario del suolo".</i>                                                                               | "There were landslides, upheavals and lowering of the ground with the uprooting of many trees. Step by step we found frequent upheavals of the ground, with the double phenomenon that we observed the lowering together with the rise above the ordinary level of the ground".                                                                 | Vivenzio, 1788                                                                                                                                                                  |
|                                 | Galatro (RC)                            | <i>"Nel terreno si aprirono grandi e profonde fenditure."</i>                                                                                                                                                                                                                                                                                                                 | "Great and deep fissures opened in the ground."                                                                                                                                                                                                                                                                                                 | Vivenzio, 1788                                                                                                                                                                  |
|                                 | Cosoleto Vecchio (RC)                   | <i>"la piana detta di Cineti, coltivata a olivi, subì uno sprofondamento di circa 300 palmi (78 m)."</i>                                                                                                                                                                                                                                                                      | "The so-called Cineti plan, cultivated with olive trees, suffered a sinking of about 300 palms (78 m)."                                                                                                                                                                                                                                         | Vivenzio, 1788;<br>Sarconi, 1784;<br>Gallo, 1784;<br>Biblioteca Com Mozzi-Borgetti;<br>De Dolomieu, 1784 ;<br>Augusti, 1783;<br>Biblioteca Nazionale<br>"Vittorio Emanuele III" |
|                                 | Lubrichi (RC)                           | <i>"Nel terreno si creò un avvallamento sì grandi proporzioni."</i>                                                                                                                                                                                                                                                                                                           | "A depression of great proportions was created in the ground."                                                                                                                                                                                                                                                                                  | Gallo, 1784;                                                                                                                                                                    |
|                                 | Scido (RC)                              | <i>"Nelle contrade denominate Cesarini, Sant'Elia, Pera, Scapola e Pitindia vi furono smottamenti e si aprirono fenditure nel terreno con gravi danni alle coltivazioni; in una rupe nei pressi del torrente Verdune si verificò un crollo che diede origine ad una cavità di passi 32 (58,5 m) di perimetro e palmi 17 (4,5 m) di profondità."</i>                           | "In the districts called Cesarini, Sant'Elia, Pera, Scapola and Pitindia there were landslides and fissures opened in the ground with serious damage to the crops; in a cliff near the Verdune torrent there was a collapse which gave rise to a cavity of steps 32 (58.5 m) in perimeter and 17 palms (4.5 m) deep."                           | Vivenzio, 1788<br>De Leone, 1783<br>Sarconi, 1784                                                                                                                               |
|                                 | Cittanova (Casalnuovo) (RC)             | <i>"Molte fenditure della larghezza di 7-8 palmi (2 m) si aprirono nel terreno sia all'interno dell'abitato che nelle campagne circostanti; nel suolo si produsse un avvallamento della circonferenza di 600 passi geometrici (1200 m); molte colline franarono; alla base di una rupe denominata Cavillica si aprì una fenditura della lunghezza di 1000 passi (260 m)."</i> | "Many fissures with a width of 7-8 palms (2 m) opened in the ground both inside the town and in the surrounding countryside; a depression was produced in the ground with a circumference of 600 geometric steps (1200 m); many hills collapsed; at the base of a cliff called Cavillica a fissure with a length of 1000 paces (260 m) opened." | Vivenzio, 1788<br>Sarconi, 1784<br>De Dolomieu, 1784                                                                                                                            |
| 6.2.1783<br>(Calabria)          | Laganadi (RC)                           | <i>"Nel terreno si verificarono avvallamenti e di allargarono due fenditure già presenti prima del terremoto."</i>                                                                                                                                                                                                                                                            | "Depressions occurred in the ground and two fissures that were already present before the earthquake widened."                                                                                                                                                                                                                                  | Vivenzio, 1788<br>Sarconi, 1784                                                                                                                                                 |
| 7.2.1783<br>(Calabria)          | Messina                                 | <i>"Abbassamento del suolo nel porto... nel suolo si aprirono fenditure dalle quali uscirono gas dall'odore di zolfo anche all'interno della Cittadella si aprirono molte fenditure"</i>                                                                                                                                                                                      | "Lowering of the ground in the port ... cracks opened in the ground from which gases with the smell of sulfur came out, even inside the Cittadella many cracks opened"                                                                                                                                                                          | Lallement, 1785                                                                                                                                                                 |
|                                 | Gerocarne (VV)                          | <i>"Nelle colline limitrofe si innescarono movimenti franosi e nei terreni lungo la strada per Soriano si aprirono profonde fenditure."</i>                                                                                                                                                                                                                                   | "Landslides were triggered in the neighboring hills and deep fissures opened up in the land along the road to Soriano."                                                                                                                                                                                                                         | Botta, 1833                                                                                                                                                                     |
|                                 | Caridà (RC)                             | <i>"Si verificarono frane, sollevamenti ed abbassamenti del terreno con sradicamento di molti alberi. Trovammo di passo in passo frequenti rivolgimenti di terreni, col doppio fenomeno che in essi allo sbassamento osservammo unito l'innalzamento oltre al livello ordinario del suolo"</i>                                                                                | "There were landslides, upheavals and lowering of the land with the uprooting of many trees. We found frequent upheavals of the land step by step, with the double phenomenon that in them we observed the lowering together with the rise beyond the ordinary level of the ground"                                                             | Vivenzio, 1788<br>Sarconi, 1784                                                                                                                                                 |
|                                 | Filogaso (VV)                           | <i>"Nel terreno si verificarono alcune fratture e smottamenti."</i>                                                                                                                                                                                                                                                                                                           | "There were some cracks and landslides in the ground."                                                                                                                                                                                                                                                                                          | Vivenzio, 1788<br>Sarconi, 1784                                                                                                                                                 |
|                                 | Francica (VV)                           | <i>"Nel terreno si aprirono fenditure e si verificarono avvallamenti."</i>                                                                                                                                                                                                                                                                                                    | "Fissures opened up in the ground and depressions occurred."                                                                                                                                                                                                                                                                                    | Sarconi, 1784                                                                                                                                                                   |
|                                 | Paravati (VV)                           | <i>"Nel terreno di aprirono molte fenditure."</i>                                                                                                                                                                                                                                                                                                                             | "Many fissures opened up in the ground."                                                                                                                                                                                                                                                                                                        | Sarconi, 1784                                                                                                                                                                   |
|                                 | Certosa di Santo Stefano del Bosco (VV) | <i>"Attorno al monastero si aprirono fenditure e vi furono avvallamenti nel terreno."</i>                                                                                                                                                                                                                                                                                     | "Around the monastery fissures opened and there were depressions in the ground."                                                                                                                                                                                                                                                                | Vivenzio, 1788                                                                                                                                                                  |
|                                 | Nicastrello (VV)                        | <i>"Nel terreno si aprirono numerose fenditure."</i>                                                                                                                                                                                                                                                                                                                          | "Many fissures opened up in the ground."                                                                                                                                                                                                                                                                                                        | Sarconi, 1784                                                                                                                                                                   |
|                                 | Vallelonga (VV)                         | <i>"Si aprirono numerose fenditure nel terreno e si verificarono molti smottamenti con danno alle coltivazioni."</i>                                                                                                                                                                                                                                                          | "Many fissures opened up in the ground and many landslides occurred with damage to crops."                                                                                                                                                                                                                                                      | Vivenzio, 1788<br>Sarconi, 1784                                                                                                                                                 |
|                                 | Soriano (VV)                            | <i>"Tutta la ruina è lunga dall'est all'ovest quasi cento sessanta passi comuni. Si estende dal nord al sud per cincinquanta passi; ed è profonda inegualmente, ove ottanta, ove cento, ove centocinquanta, e più palmi"</i>                                                                                                                                                  | "The whole ruin is long from east to west, almost one hundred and sixty common paces. It extends from north to south for one hundred and fifty paces; and it is unequally deep, where eighty, where one hundred, where one hundred and fifty, and more palms"                                                                                   | Sarconi, 1784                                                                                                                                                                   |
| 01.3.1783<br>(central Calabria) | Montesanto (VV)                         | <i>"Nel suolo si aprirono numerose fenditure."</i>                                                                                                                                                                                                                                                                                                                            | "Many fissures opened up in the ground."                                                                                                                                                                                                                                                                                                        | Vivenzio, 1788                                                                                                                                                                  |
|                                 | Poliolo (VV)                            | <i>"Lunghe e profonde fenditure si verificarono nel terreno su cui sorgeva il paese e a ovest dell'abitato; avvallamenti si verificarono lungo la strada in direzione di Monterosso."</i>                                                                                                                                                                                     | "Long and deep fissures occurred in the land on which the town stood and to the west of the town; depressions occurred along the road in the direction of Monterosso."                                                                                                                                                                          | Vivenzio, 1788<br>Sarconi, 1784<br>Biblioteca Nazionale<br>"Vittorio Emanuele III"                                                                                              |
|                                 | Filogaso (VV)                           | <i>"Nel terreno si verificarono alcune fratture e smottamenti."</i>                                                                                                                                                                                                                                                                                                           | "There were some cracks and landslides in the ground."                                                                                                                                                                                                                                                                                          | Vivenzio, 1788<br>Sarconi, 1784                                                                                                                                                 |
|                                 | Nicastrello (VV)                        | <i>"Nel terreno si aprirono numerose fenditure."</i>                                                                                                                                                                                                                                                                                                                          | "Many fissures opened up in the ground."                                                                                                                                                                                                                                                                                                        | Sarconi, 1784                                                                                                                                                                   |
|                                 | Panaia (VV)                             | <i>"Si verificarono smottamenti e si aprirono fenditure nel terreno."</i>                                                                                                                                                                                                                                                                                                     | "Slides occurred and fissures opened in the ground."                                                                                                                                                                                                                                                                                            | Vivenzio, 1788<br>Sarconi, 1784                                                                                                                                                 |
|                                 | Vallelonga (VV)                         | <i>"Si aprirono numerose fenditure nel terreno e si verificarono molti smottamenti con danno alle coltivazioni."</i>                                                                                                                                                                                                                                                          | "Many fissures opened up in the ground and many landslides occurred with damage to crops."                                                                                                                                                                                                                                                      | Vivenzio, 1788<br>Sarconi, 1784                                                                                                                                                 |
| 26.4.1783<br>(Milazzo)          | Montesanto (VV)                         | <i>"Nel suolo si aprirono numerose fenditure."</i>                                                                                                                                                                                                                                                                                                                            | "Many fissures opened up in the ground."                                                                                                                                                                                                                                                                                                        | Vivenzio, 1788<br>Sarconi, 1784                                                                                                                                                 |
|                                 | Messina                                 | <i>"Si aprì il terreno nel teatro marittimo da sotto il palazzo reale fino al palazzo senatorio con due e tre lunghe fenditure una dietro l'altra dove più, dove meno larghe, abbassandosi parecchi piedi dalla parte del mare".</i>                                                                                                                                          | "The ground in the maritime theater opened up from under the royal palace to the senatorial palace with two and three long slits one behind the other where more, where less wide, lowering several feet on the seaside".                                                                                                                       | Gallo,1783;<br>Gallo 1784                                                                                                                                                       |



|                                                                                                                                                                                                                                                                                                                                                                                 |  |                                                                                                                                             |                                                                                                              |             |
|---------------------------------------------------------------------------------------------------------------------------------------------------------------------------------------------------------------------------------------------------------------------------------------------------------------------------------------------------------------------------------|--|---------------------------------------------------------------------------------------------------------------------------------------------|--------------------------------------------------------------------------------------------------------------|-------------|
|                                                                                                                                                                                                                                                                                                                                                                                 |  | <i>“le medesime fenditure si vedono ancora nelle vicine colline presso alle loro cime con buona parte di terreno smottato di una falda”</i> | "The same crevices can still be seen in the nearby hills near their peaks with a good part of the landslide" | Gallo, 1784 |
| Main historical sources                                                                                                                                                                                                                                                                                                                                                         |  |                                                                                                                                             |                                                                                                              |             |
| Augusti M. (1783) Dei terremoti di Messina e di Calabria dell’anno 1783, memorie e riflessioni, Bologna.                                                                                                                                                                                                                                                                        |  |                                                                                                                                             |                                                                                                              |             |
| Baratta M. (1901) I terremoti d’Italia; saggio di storia geografia e bibliografia sismica italiana, Torino, 950 pp.                                                                                                                                                                                                                                                             |  |                                                                                                                                             |                                                                                                              |             |
| Baratta M. (1910) La catastrofe sismica calabro messinese (28 dicembre 1908), 2 vols. Roma (facsimile print, Sala Bolognese 1985).                                                                                                                                                                                                                                              |  |                                                                                                                                             |                                                                                                              |             |
| Biblioteca Comunale "Mozzi-Borgetti" di Macerata, Manoscritti, 1054, VI, Francesco Pignatelli, Paesi, che han sofferto danno nel terremoto dei 5 febbraio 1783                                                                                                                                                                                                                  |  |                                                                                                                                             |                                                                                                              |             |
| Biblioteca Nazionale "Vittorio Emanuele III" di Napoli, Manoscritti, Fondo Brancacciano, II.A.21, cc.352-354r, Lettera degli ingegneri A.Winspeare e F.La Vega al ministro di Guerra e Marina generale Acton e al primo ministro marchese della Sambuca relativa al loro operato nei lavori di ricostruzione in seguito ai terremoti calabresi del 1783, Oppido 31 maggio 1783. |  |                                                                                                                                             |                                                                                                              |             |
| Botta V.C., Storia d’Italia continuata da quella del Guicciardini sino al 1789, 10 voll. Paris                                                                                                                                                                                                                                                                                  |  |                                                                                                                                             |                                                                                                              |             |
| Corrao A. (1784) Memoria sopra i tremuoti di Messina accaduti nell’anno 1783. Messina                                                                                                                                                                                                                                                                                           |  |                                                                                                                                             |                                                                                                              |             |
| De Leone A. (1783) Giornale e notizie de’ tremuori accaduti l’anno 1783 nella provincia di Catanzaro. Napoli.                                                                                                                                                                                                                                                                   |  |                                                                                                                                             |                                                                                                              |             |
| De Lorenzo A. (1877) Memorie da servire alla storia sacra e civile di Reggio e delle Calabrie, Cronache e Documenti inediti o rari. vol. I, Reggio Calabria.                                                                                                                                                                                                                    |  |                                                                                                                                             |                                                                                                              |             |
| De Rossi M.S. (1889) Documenti raccolti dal defunto Conte Antonio Malvasia per la storia dei terremoti ed eruzioni vulcaniche massime d’Italia, in "Memorie della Pontificia Accademia dei Nuovi Lincei", vol.5, pp.169-289                                                                                                                                                     |  |                                                                                                                                             |                                                                                                              |             |
| Dolomieu D. (1784) Mémoire sur le Tremblement de Terre de la Calabre Pendant l’Année 1783. Fulgoni, Rome.                                                                                                                                                                                                                                                                       |  |                                                                                                                                             |                                                                                                              |             |
| Galimi P. (1783) Lettera di Procopio Galimi al signor D. Giuseppe Vairo sui tremuoti di Calabria dell’anno 1783.                                                                                                                                                                                                                                                                |  |                                                                                                                                             |                                                                                                              |             |
| Gallo A. (1783) Relazione istorico-fisica de’ terremoti accaduti in Messina in quest’anno 1783, Messina.                                                                                                                                                                                                                                                                        |  |                                                                                                                                             |                                                                                                              |             |
| Gallo A. (1784) Lettera istorico-fisica de’ terremoti accaduti in Messina nel mese di febbraio di quest’anno 1783, Messina, 8 marzo 1783, Bologna.                                                                                                                                                                                                                              |  |                                                                                                                                             |                                                                                                              |             |
| Gallo A. (1784) Lettere scritte da Andrea Gallo e dirizzate al signor Cavaliere N.N. delle Reali Accademie di Londra, Bordò e Upsal pelli terremoti del 1783 con un giornale meteorologico de’ medemi. Messina                                                                                                                                                                  |  |                                                                                                                                             |                                                                                                              |             |
| Graziani L, Maramai A, Tinti S. (2006). A revision of the 1783–1784 Calabrian (southern Italy) tsunamis. Nat Hazards Earth Syst Sci, 6:1053–1060                                                                                                                                                                                                                                |  |                                                                                                                                             |                                                                                                              |             |
| Grimaldi A. (1784) Descrizione de’ terremoti accaduti nelle Calabrie nel 1783, opera postuma di Francesco Antonio Grimaldi, Napoli, pp. 28-80.                                                                                                                                                                                                                                  |  |                                                                                                                                             |                                                                                                              |             |
| Guidoboni E., Ferrari G., Mariotti D., Comastri A., Tarabusi G., Sgattoni G., Valensise G. (2018). CFTI5Med, Catalogo dei Forti Terremoti in Italia (461 a.C.-1997) e nell’area Mediterranea (760 a.C.-1500). Istituto Nazionale di Geofisica e Vulcanologia (INGV). doi: <a href="https://doi.org/10.6092/ingv.it-cfti5">https://doi.org/10.6092/ingv.it-cfti5</a>             |  |                                                                                                                                             |                                                                                                              |             |
| Hamilton G. (1783) Descrizione dei terremoti che hanno sconvolto una parte del Regno di Napoli, dal mese di febbraio fino in maggio 1783. In: Gibelin (ed.), Compendio delle Transazioni Filosofiche della Società Reale di Londra recate in italiano, I, Tomo I, pp. 16-60, Venezia.                                                                                           |  |                                                                                                                                             |                                                                                                              |             |
| Hamilton W. (1783) Relazione dell’ultimo terremoto delle Calabrie e delle Sicilia, sent by Hamilton SEG (trans: doctor Sella, G, Firenze)                                                                                                                                                                                                                                       |  |                                                                                                                                             |                                                                                                              |             |
| Lallement, M. (1785): Relation envoyée par M. Lallement, viceconsult de France a Messine, au ministre, in J.C.R. de Saint-Non, “Voyage pittoresque à Naples et en Sicile”, vol. 4, parte I, pp. 5-10.                                                                                                                                                                           |  |                                                                                                                                             |                                                                                                              |             |
| Masci A. (1783) Diario estratto da una eruditissima relazione de’ terremoti del Sign. D. Angelo Masci di Santa Sofia paese della Calabria Citeriore posto tra Rosarno e Cosenza distante 24 miglia da quest’ultima. Bologna.                                                                                                                                                    |  |                                                                                                                                             |                                                                                                              |             |
| Minasi G. (1783) Relazione veridica intorno al terribile tremoto accaduto in Scilla a 5 febbrajo 1783, o sia Notizia storica esibita al pubblico: scritta la presente in forma pistolare ad uno amico in assenza. Messina.                                                                                                                                                      |  |                                                                                                                                             |                                                                                                              |             |
| Minasi G. (1785) Continuazione ed appendice sopra i tremuoti descritti nella relazione colla data di Scilla del 30 settembre 1783, con altro che accadde in progresso. Messina,                                                                                                                                                                                                 |  |                                                                                                                                             |                                                                                                              |             |
| Onorati N., Dissertazione sul tremuoto di Messina, e di Calabria avvenuto il dì 5 e 7 di febbrajo del corrente anno MDCCLXXXIII. Napoli                                                                                                                                                                                                                                         |  |                                                                                                                                             |                                                                                                              |             |
| Palestino G. (1895) Cenno storico sui tremuoti del 1783, in “Un secondo manipolo di monografie e memorie reggine e calabresi”, ed. A.M. De Lorenzo, Siena, 279–310.                                                                                                                                                                                                             |  |                                                                                                                                             |                                                                                                              |             |
| Pensante Peloritano (Ignazio Paternò Castello), Descrizione del terribile terremoto de’ 5 febbraio 1783 che afflisce la Sicilia, distrusse Messina e gran parte della Calabria. Napoli                                                                                                                                                                                          |  |                                                                                                                                             |                                                                                                              |             |
| Relazione dell’ambasciatore Veneto a Napoli Andrea Alberti al Senato della Repubblica Veneta sul terremoto del 1783, Napoli 11 marzo 1783, in A. Placanica, "L’Iliade funesta, storia del terremoto calabro-messinese del 1783", pp.188-189. Roma                                                                                                                               |  |                                                                                                                                             |                                                                                                              |             |
| Relazione istorico-fisica dè terremoti accaduti in Messina in quest’anno 1783. Messina, 1783.                                                                                                                                                                                                                                                                                   |  |                                                                                                                                             |                                                                                                              |             |
| Roscitano P. (1783) Memoria istorico–filosofica de’ terremoti della città di Reggio di Calabria in occasione dello smisurato terremoto di quest’anno 1783. Messina.                                                                                                                                                                                                             |  |                                                                                                                                             |                                                                                                              |             |
| Sarconi M. (1784) Istoria de’ fenomeni del tremoto avvenuto nelle Calabrie, e nel Valdemone nell’anno 1783. Reale Accademia delle Scienze, e delle Belle Lettere di Napoli, Napoli, 527 pp.                                                                                                                                                                                     |  |                                                                                                                                             |                                                                                                              |             |
| Serrao E. (1785) De’ tremuoti e della nuova Filadelfia in Calabria commentario, Napoli, pp. 1-14.                                                                                                                                                                                                                                                                               |  |                                                                                                                                             |                                                                                                              |             |
| Torcia M. (1783) Tremuoto avvenuto nella Calabria e a Messina alli 5 febbrajo 1783 descritto da Michele Torcia. Archiviario di S. M. Siciliana e Membro della Accademia Regia, Napoli.                                                                                                                                                                                          |  |                                                                                                                                             |                                                                                                              |             |
| Torreani O.M. (1784) Notizie istoriche del tremuoto di Messina capitale della Sicilia e di tutto quanto è in essa avvenuto dalli 5 febraro per tutti li 2 marzo 1783, pp.42-58.                                                                                                                                                                                                 |  |                                                                                                                                             |                                                                                                              |             |
| Vivenzio G. (1783) Istoria e teoria de’ tremuoti in generale ed in particolare di quelli della Calabria, e di Messina del 1783, Napoli, 384 pp.                                                                                                                                                                                                                                 |  |                                                                                                                                             |                                                                                                              |             |
| Vivenzio G. (1788) Istoria de’ tremuoti avvenuti nella provincia della Calabria ulteriore, e nella città di Messina nell’anno 1783 e di quanto nella Calabria fu fatto per lo suo risorgimento fino al 1787. Preceduta da una teoria, ed istoria generale de’ tremuoti, 2 voll., Napoli.                                                                                        |  |                                                                                                                                             |                                                                                                              |             |

| <div> <div>Table S2</div> <div>1791 (Mw 5.89) CENTRAL- CALABRIA EARTHQUAKE</div> </div>                                                                                                                                                                                                                                                                                                                                                         |          |                                                                                                        |                                                                                                         |                |
|-------------------------------------------------------------------------------------------------------------------------------------------------------------------------------------------------------------------------------------------------------------------------------------------------------------------------------------------------------------------------------------------------------------------------------------------------|----------|--------------------------------------------------------------------------------------------------------|---------------------------------------------------------------------------------------------------------|----------------|
| Description                                                                                                                                                                                                                                                                                                                                                                                                                                     |          |                                                                                                        |                                                                                                         |                |
| The 1791 October 13 Central Calabria earthquake damaged again the Serre area. The seismic sequence lasted until the 20 October, the I <sub>max</sub> was 8-9 EMS, Mw = 5.9. There were 15 victims.                                                                                                                                                                                                                                              |          |                                                                                                        |                                                                                                         |                |
| Historical evidence of coseismic effects, reports and sources                                                                                                                                                                                                                                                                                                                                                                                   |          |                                                                                                        |                                                                                                         |                |
| Event                                                                                                                                                                                                                                                                                                                                                                                                                                           | Location | Evidence (in original language)                                                                        | Evidence (translated)                                                                                   | Source         |
| 13.10.1791                                                                                                                                                                                                                                                                                                                                                                                                                                      | -        | <i>“di tutt’i moti tremò per ben 50 secondi: sicché il suolo in ampie voragini nuovamente si aprì”</i> | “of all the motions it trembled for a good 50 seconds: so that the ground opened again in large chasms” | Grimaldi, 1863 |
| Main historical sources                                                                                                                                                                                                                                                                                                                                                                                                                         |          |                                                                                                        |                                                                                                         |                |
| ASC (1791-92a), Archivio di Stato di Catanzaro, Cassa Sacra, Segreteria Pagana, cartella 15, fasc.291. Lettera dell’Avvocato Fiscale di Serra San Bruno V. Codagnoni alla Regia Udienza di Catanzaro relativa ai danni causati dal terremoto del 13 ottobre 1791. Serra San Bruno 13 ottobre 1791.                                                                                                                                              |          |                                                                                                        |                                                                                                         |                |
| ASC (1791-92b), Archivio di Stato di Catanzaro, Cassa Sacra, Segreteria Pagana, cartella 15, fasc.291. Lettera dell’Amministratore del Distretto di Arena G.A. Rascaglia al Presidente della Giunta di Cassa Sacra M. De Mauro relativa ai danni causati dal terremoto del 13 ottobre 1791. Arena 14 ottobre 1791.                                                                                                                              |          |                                                                                                        |                                                                                                         |                |
| ASC (1791-92c), Archivio di Stato di Catanzaro, Cassa Sacra, Segreteria Pagana, cartella 15, fasc.29. Lettera dell’Amministratore del Distretto di Mileto S. Catagnoti al Presidente della Giunta di Cassa Sacra M. De Mauro relativa ai danni causati dal terremoto del 13 ottobre 1791. Monteleone 15 ottobre 1791                                                                                                                            |          |                                                                                                        |                                                                                                         |                |
| ASC (1791-92d), Archivio di Stato di Catanzaro, Cassa Sacra, Segreteria Pagana, cartella 15, fasc.291. Informativa da San Giorgio Morgeto al Presidente della Giunta di Cassa Sacra relativa alla scossa di terremoto avvertita il 13 ottobre 1791. San Giorgio Morgeto 15 ottobre 1791.                                                                                                                                                        |          |                                                                                                        |                                                                                                         |                |
| ASC (1791-92e), Archivio di Stato di Catanzaro, Cassa Sacra, Segreteria Pagana, cartella 15, fasc.291. Relazione del Governatore di Serra San Bruno B. De Angelis al Presidente della Giunta di Cassa Sacra M. De Mauro sui danni causati dal terremoto del 13 ottobre 1791. Serra San Bruno 17 ottobre 1791                                                                                                                                    |          |                                                                                                        |                                                                                                         |                |
| ASC (1791-92f), Archivio di Stato di Catanzaro, Cassa Sacra, Segreteria Pagana, cartella 15, fasc.291. Informativa da Squillace al Presidente della Giunta di Cassa Sacra M. De Mauro relativa ai danni causati dal terremoto del 13 ottobre 1791. Squillace 21 ottobre 1791.                                                                                                                                                                   |          |                                                                                                        |                                                                                                         |                |
| ASC (1791-92g), Archivio di Stato di Catanzaro, Cassa Sacra, Segreteria Pagana, cartella 15, fasc.291. Lettera dell’Ispettore del Ripartimento di Squillace M. De Mauro al Presidente della Giunta di Cassa Sacra relativa ai danni causati dal terremoto del 13 ottobre 1791. Catanzaro 22 ottobre 1791.                                                                                                                                       |          |                                                                                                        |                                                                                                         |                |
| ASC (1791-92h), Archivio di Stato di Catanzaro, Cassa Sacra, Segreteria Pagana, cartella 15, fasc.291. Lettera dell’Ispettore del Ripartimento di Reggio Calabria De Bonis al Presidente della Giunta di Cassa Sacra De Mauro relativa ai danni causati dal terremoto del 13 ottobre 1791. Reggio Calabria 22 ottobre 1791.                                                                                                                     |          |                                                                                                        |                                                                                                         |                |
| ASC (1791-92i), Archivio di Stato di Catanzaro, Cassa Sacra, Segreteria Pagana, cartella 15, fasc.291. Relazione dell’Ispettore C. Pedicini al Segretario di Stato per gli Affari Ecclesiastici e Presidente della Suprema Giunta di Corrispondenza di Napoli F. Corradini sui danni causati dal terremoto del 13 ottobre 1791. Soriano Calabro 22 ottobre 1791.                                                                                |          |                                                                                                        |                                                                                                         |                |
| ASC (1791-92k), Archivio di Stato di Catanzaro, Cassa Sacra, Segreteria Pagana, cartella 15, fasc.291. Informativa dalla Certosa di Santo Stefano del Bosco al Presidente della Giunta di Cassa Sacra M. De Mauro relativa ai danni causati dal terremoto del 13 ottobre 1791. Santo Stefano del Bosco 24 ottobre 1791.                                                                                                                         |          |                                                                                                        |                                                                                                         |                |
| ASC (1791-92i), Archivio di Stato di Catanzaro, Cassa Sacra, Segreteria Pagana, cartella 15, fasc. 291. Lettera dell’Ispettore del Ripartimento di Squillace M. De Mauro alla Giunta di Cassa Sacra relativa ai danni causati dal terremoto del 13 ottobre 1791 nel Dipartimento di Squillace. San Vito sullo Ionio 26 ottobre 1791.                                                                                                            |          |                                                                                                        |                                                                                                         |                |
| ASC (1791-92j), Archivio di Stato di Catanzaro, Cassa Sacra, Segreteria Pagana, cartella 15, fasc.291. Informativa da Stignano al Presidente della Giunta di Cassa Sacra M. De Mauro relativa ai danni causati dal terremoto del 13 ottobre 1791. Stignano 26 ottobre 1791.                                                                                                                                                                     |          |                                                                                                        |                                                                                                         |                |
| ASC (1791-92l), Archivio di Stato di Catanzaro, Cassa Sacra, Segreteria Pagana, cartella 15, fasc.291. Relazione dell’Ispettore C. Pedicini al Segretario di Stato per gli Affari Ecclesiastici e Presidente della Suprema Giunta di Corrispondenza di Napoli F. Corradini sui danni causati dal terremoto del 13 ottobre 1791. Monteleone 29 ottobre 1791                                                                                      |          |                                                                                                        |                                                                                                         |                |
| ASC (1791-92m), Archivio di Stato di Catanzaro, Cassa Sacra, Segreteria Pagana, cartella 15, fasc.291. Lettera dell’Ispettore del Ripartimento di Reggio Calabria De Bonis al Presidente della Giunta di Cassa Sacra M.De Mauro relativa ai danni causati dal terremoto del 13 ottobre 1791 e sui provvedimenti adottati, Reggio Calabria 29 ottobre 1791.                                                                                      |          |                                                                                                        |                                                                                                         |                |
| ASC (1791-92n), Archivio di Stato di Catanzaro, Cassa Sacra, Segreteria Pagana, cartella 15, fasc.291 (1791-92), Lettera dell’Ispettore del Ripartimento di Squillace M. De Mauro al Presidente della Giunta di Cassa Sacra relativa ai danni causati dal terremoto del 13 ottobre 1791. Badolato 1 novembre 1791.                                                                                                                              |          |                                                                                                        |                                                                                                         |                |
| ASC (1791-92o), Archivio di Stato di Catanzaro, Cassa Sacra, Segreteria Pagana, cartella 15, fasc.291. Lettera dell’Architetto G. Oliverio all’Ingegnere Direttore della Piana in Palmi P. Saldo relativa ai danni riscontrati nei paesi danneggiati dal terremoto del 13 ottobre 1791, Sant’Eufemia d’Aspromonte 4 novembre 1791.                                                                                                              |          |                                                                                                        |                                                                                                         |                |
| ASC (1791-92p), Archivio di Stato di Catanzaro, Cassa Sacra, Segreteria Pagana, cartella 15, fasc.291. Lettera del Ministro della Giunta di Cassa Sacra M. De Mauro all’Avvocato Fiscale della Giunta di Cassa Sacra D. Ciaraldi relativa alle disposizioni date in soccorso delle popolazioni di Chiaravalle, San Vito sullo Ionio, Olivadi e Centracche danneggiate dal terremoto del 13 ottobre 1791. Francavilla Angitola 15 novembre 1791. |          |                                                                                                        |                                                                                                         |                |
| ASC (1791-92q), Archivio di Stato di Catanzaro, Cassa Sacra, Segreteria Pagana, cartella 15, fasc.291. Lettera dell’Ispettore M.De Mauro all’Avvocato Fiscale della Giunta di Cassa Sacra D. Ciaraldi relativa alle disposizioni date in riparo dei danni causati dal terremoto del 13 ottobre 1791 nei paesi di Francavilla Angitola, Polia, Poliolo, Filadelfia e Monterosso Calabro. Torre di Ruggero 23 novembre 1791.                      |          |                                                                                                        |                                                                                                         |                |
| ASC (1791-92r), Archivio di Stato di Catanzaro, Cassa Sacra, Segreteria Pagana, cartella 15, fasc.291. Lettera dell’Ispettore del Ripartimento di San Mauro Marchesato all’Avvocato della Giunta di Cassa Sacra D.Ciaraldi relativa ai danni causati dal terremoto del 13 ottobre 1791, alla riparazione delle case danneggiate e alla riscossione degli affitti, San Mauro Marchesato 25 novembre 1791.                                        |          |                                                                                                        |                                                                                                         |                |
| Grimaldi A. (1863) La Cassa Sacra ovvero la soppressione delle mani morte in Calabria nel sec. XVIII. Napoli                                                                                                                                                                                                                                                                                                                                    |          |                                                                                                        |                                                                                                         |                |
| Tripodi A. (1986), Il terremoto del 1791 nello Stato d’Arena e Soreto, in "Calabria Letteraria", a.34. n.7-8-9, 31-35. Soveria Mannelli (CZ)                                                                                                                                                                                                                                                                                                    |          |                                                                                                        |                                                                                                         |                |

| <div> <div>Table S3</div> <div>1894 (Mw 6.08) SOUTHERN- CALABRIA SEISMIC SEQUENCE</div> </div>                                                                                                                                                                                                                                        |                           |                                                                                                                                                                                                                                                                                                                                                                                                                                                                                                                                                                                                                |                                                                                                                                                                                                                                                                                                                                                                                                                                                                                                                                                                                               |                           |
|---------------------------------------------------------------------------------------------------------------------------------------------------------------------------------------------------------------------------------------------------------------------------------------------------------------------------------------|---------------------------|----------------------------------------------------------------------------------------------------------------------------------------------------------------------------------------------------------------------------------------------------------------------------------------------------------------------------------------------------------------------------------------------------------------------------------------------------------------------------------------------------------------------------------------------------------------------------------------------------------------|-----------------------------------------------------------------------------------------------------------------------------------------------------------------------------------------------------------------------------------------------------------------------------------------------------------------------------------------------------------------------------------------------------------------------------------------------------------------------------------------------------------------------------------------------------------------------------------------------|---------------------------|
| Description                                                                                                                                                                                                                                                                                                                           |                           |                                                                                                                                                                                                                                                                                                                                                                                                                                                                                                                                                                                                                |                                                                                                                                                                                                                                                                                                                                                                                                                                                                                                                                                                                               |                           |
| There were two foreshocks before the 1894 November 16 Southern Calabria, a mainshock and several aftershocks until the June 16, 1895. The Imax was 9 EMS and Mw 6.1. There were 96 victims.                                                                                                                                           |                           |                                                                                                                                                                                                                                                                                                                                                                                                                                                                                                                                                                                                                |                                                                                                                                                                                                                                                                                                                                                                                                                                                                                                                                                                                               |                           |
| Historical evidence of coseismic effects, reports and sources                                                                                                                                                                                                                                                                         |                           |                                                                                                                                                                                                                                                                                                                                                                                                                                                                                                                                                                                                                |                                                                                                                                                                                                                                                                                                                                                                                                                                                                                                                                                                                               |                           |
| Event                                                                                                                                                                                                                                                                                                                                 | Location                  | Evidence (in original language)                                                                                                                                                                                                                                                                                                                                                                                                                                                                                                                                                                                | Evidence (translated)                                                                                                                                                                                                                                                                                                                                                                                                                                                                                                                                                                         | Source                    |
| 16.11.1894                                                                                                                                                                                                                                                                                                                            | Delianova                 | <i>“Nei dintorni dell’abitato si verificarono frane di pietre, scoscienti e fratture nel terreno lunghe circa 100 m. Fu riscontrata diminuzione della portata d’acqua in una fontana pubblica”</i>                                                                                                                                                                                                                                                                                                                                                                                                             | “Around the town rock falls, landslides and fractures in the ground about 100 m long occurred. A decrease in water flow was detected in a public fountain”                                                                                                                                                                                                                                                                                                                                                                                                                                    | Riccò, 1897               |
|                                                                                                                                                                                                                                                                                                                                       | Rosarno                   | <i>“Una fontana rimase secca fino al febbraio 1895, quando l’acqua ritornò in quantità minore e intorbidata. Presso il letto del fiume Mesima fu riscontrata una frattura del terreno”</i>                                                                                                                                                                                                                                                                                                                                                                                                                     | “A fountain remained dry until February 1895, when the water returned in less quantities and turbid. A fracture in the ground was observed along the bed of the river Mesima”                                                                                                                                                                                                                                                                                                                                                                                                                 | Riccò, 1897               |
|                                                                                                                                                                                                                                                                                                                                       | Solano Inferiore          | <i>“Furono riscontrate nel terreno larghe fratture superficiali di 30 o 40 cm. In alcune fontane l’acqua scomparve durante la scossa principale e ritornò dopo qualche ora per poi scomparire definitivamente”</i>                                                                                                                                                                                                                                                                                                                                                                                             | “Large superficial fractures of 30 or 40 cm were found in the ground. In some fountains the water disappeared during the main shock returning after a few hours and then it disappeared definitively"                                                                                                                                                                                                                                                                                                                                                                                         | Riccò, 1897               |
|                                                                                                                                                                                                                                                                                                                                       | Molochio                  | <i>“Nella vicina Fiumara Sicca si verificò uno sprofondamento del terreno dell’alveo di 8 m di profondità e 3 m di larghezza”</i>                                                                                                                                                                                                                                                                                                                                                                                                                                                                              | "In the nearby Fiumara Sicca there was a sinking of the riverbed soil, 8 m deep and 3 m wide"                                                                                                                                                                                                                                                                                                                                                                                                                                                                                                 | Riccò, 1897               |
|                                                                                                                                                                                                                                                                                                                                       | Barcellona Pozzo di Gotto | <i>Nella stradella che dal torrente Longano porta a Miloto, stradella che per la lunghezza di 50 metri fu rovinata, così che quel tratto è già stato sbarrato</i>                                                                                                                                                                                                                                                                                                                                                                                                                                              | “The small road that leads from the Longano stream to Miloto was ruined for 50 meters of length, therefore that road stretch has already been blocked”                                                                                                                                                                                                                                                                                                                                                                                                                                        | Giornale di Sicilia, 1894 |
|                                                                                                                                                                                                                                                                                                                                       | Barcellona                | <i>“Fenditura di 50m si aprì nel terreno”</i>                                                                                                                                                                                                                                                                                                                                                                                                                                                                                                                                                                  |                                                                                                                                                                                                                                                                                                                                                                                                                                                                                                                                                                                               | Riccò, 1897               |
|                                                                                                                                                                                                                                                                                                                                       | Ganzirri                  | <i>“Si produssero nel suolo diverse fratture convergenti con esalazioni di idrogeno solforato. fuoriuscita di melma fumante maleodorante...; Presso il Faro per un giro di 90 da W a S attorno al lago, si produssero diverse fratture convergenti lunghe fino a 4m e larghe 5 cm; alcune erano parallele al contorno del lago, indicando un vero distacco del terreno; altre in direzione diverse; Nella riva meridionale del lago si produssero nel suolo diverse fratture convergenti in una, colla lunghezza perfino di 4m, colla larghezza di fino 5 cm, talché vi entravano i bastoni da passeggio.”</i> | “Several converging fractures were produced in the soil with hydrogen sulphide fumes. foul smelling steaming slime spill ...; Near the Lighthouse, for a 90 degree W to S turn around the lake, several converging fractures up to 4m long and 5cm wide occurred; some of them were parallel to the lake, indicating true detachment of the land; others in different directions; On the southern shore of the lake several fractures were produced in the ground converging into one, with a length of up to 4m, with a width of up to 5cm, so that walking sticks could enter inside them.” | Riccò, 1897               |
|                                                                                                                                                                                                                                                                                                                                       | Messina                   | <i>“nel bacino di carenaggio si verificarono sprofondamenti e lunghe fenditure”</i>                                                                                                                                                                                                                                                                                                                                                                                                                                                                                                                            | in the dry dock sinkings and long fissures occurred”                                                                                                                                                                                                                                                                                                                                                                                                                                                                                                                                          | Riccò, 1897               |
|                                                                                                                                                                                                                                                                                                                                       | Torre del Faro            | <i>“Ricordo a questo proposito che anche nel periodo sismico del 1783 si erano determinate nei pressi del Pantano delle fenditure, ed altre pure si sono aperte anche nel terremoto del 1894”</i>                                                                                                                                                                                                                                                                                                                                                                                                              | I recall in this regard that even in the 1783 seismic period fissures had arisen near the Pantano, and others also opened up in the earthquake of 1894"                                                                                                                                                                                                                                                                                                                                                                                                                                       | Baratta, 1910-I part      |
| Main historical sources                                                                                                                                                                                                                                                                                                               |                           |                                                                                                                                                                                                                                                                                                                                                                                                                                                                                                                                                                                                                |                                                                                                                                                                                                                                                                                                                                                                                                                                                                                                                                                                                               |                           |
| Archivio dell’Ufficio Centrale di Ecologia Agraria, Cartoline macrosismiche, novembre 1894, n.92, Cartolina macrosismica relativa al terremoto del 16 novembre 1894 inviata all’Ufficio Centrale di Meteorologia e Geodinamica di Roma, Crotone 16 novembre 1894.                                                                     |                           |                                                                                                                                                                                                                                                                                                                                                                                                                                                                                                                                                                                                                |                                                                                                                                                                                                                                                                                                                                                                                                                                                                                                                                                                                               |                           |
| Archivio dell’Ufficio Centrale di Ecologia Agraria, Cartoline macrosismiche, novembre 1894, n.84, Cartolina macrosismica relativa al terremoto del 16 novembre 1894 inviata all’Ufficio Centrale di Meteorologia e Geodinamica di Roma, Gerace 17 novembre 1894.                                                                      |                           |                                                                                                                                                                                                                                                                                                                                                                                                                                                                                                                                                                                                                |                                                                                                                                                                                                                                                                                                                                                                                                                                                                                                                                                                                               |                           |
| Archivio dell’Ufficio Centrale di Ecologia Agraria, Cartoline macrosismiche, novembre 1894, n.73, Cartolina macrosismica relativa al terremoto del 16 novembre 1894 inviata all’Ufficio Centrale di Meteorologia e Geodinamica di Roma, Maida 17 novembre 1894.                                                                       |                           |                                                                                                                                                                                                                                                                                                                                                                                                                                                                                                                                                                                                                |                                                                                                                                                                                                                                                                                                                                                                                                                                                                                                                                                                                               |                           |
| Archivio dell’Ufficio Centrale di Ecologia Agraria, Cartoline macrosismiche, novembre 1894, n.43, Cartolina macrosismica relativa al terremoto del 16 novembre 1894 inviata all’Ufficio Centrale di Meteorologia e Geodinamica di Roma, Pizzo 17 novembre 1894.                                                                       |                           |                                                                                                                                                                                                                                                                                                                                                                                                                                                                                                                                                                                                                |                                                                                                                                                                                                                                                                                                                                                                                                                                                                                                                                                                                               |                           |
| Archivio dell’Ufficio Centrale di Ecologia Agraria, Cartoline macrosismiche, novembre 1894, n.31, Cartolina macrosismica relativa al terremoto del 16 novembre 1894 inviata all’Ufficio Centrale di Meteorologia e Geodinamica di Roma, Roccella Ionica 17 novembre 1894.                                                             |                           |                                                                                                                                                                                                                                                                                                                                                                                                                                                                                                                                                                                                                |                                                                                                                                                                                                                                                                                                                                                                                                                                                                                                                                                                                               |                           |
| Archivio dell’Ufficio Centrale di Ecologia Agraria, Cartoline macrosismiche, novembre 1894, n.25, Cartolina macrosismica relativa al terremoto del 16 novembre 1894 inviata all’Ufficio Centrale di Meteorologia e Geodinamica di Roma, San Giovanni in Fiore 17 novembre 1894.                                                       |                           |                                                                                                                                                                                                                                                                                                                                                                                                                                                                                                                                                                                                                |                                                                                                                                                                                                                                                                                                                                                                                                                                                                                                                                                                                               |                           |
| Archivio dell’Ufficio Centrale di Ecologia Agraria, Cartoline macrosismiche, novembre 1894, n.14, Cartolina macrosismica relativa al terremoto del 16 novembre 1894 inviata all’Ufficio Centrale di Meteorologia e Geodinamica di Roma, Serra San Bruno 17 novembre 1894.                                                             |                           |                                                                                                                                                                                                                                                                                                                                                                                                                                                                                                                                                                                                                |                                                                                                                                                                                                                                                                                                                                                                                                                                                                                                                                                                                               |                           |
| Archivio dell’Ufficio Centrale di Ecologia Agraria, Cartoline macrosismiche, novembre 1894, n.17, Cartolina macrosismica relativa al terremoto del 16 novembre 1894 inviata all’Ufficio Centrale di Meteorologia e Geodinamica di Roma, Scigliano 17 novembre 1894.                                                                   |                           |                                                                                                                                                                                                                                                                                                                                                                                                                                                                                                                                                                                                                |                                                                                                                                                                                                                                                                                                                                                                                                                                                                                                                                                                                               |                           |
| Archivio dell’Ufficio Centrale di Ecologia Agraria, Cartoline macrosismiche, novembre 1894, n.70, Telegramma dell’assistente della Stazione di Tiriolo al direttore dell’Ufficio Centrale di Meteorologia e Geodinamica di Roma relativo al terremoto del 16 novembre 1894, Tiriolo 17 novembre 1894.                                 |                           |                                                                                                                                                                                                                                                                                                                                                                                                                                                                                                                                                                                                                |                                                                                                                                                                                                                                                                                                                                                                                                                                                                                                                                                                                               |                           |
| Archivio dell’Ufficio Centrale di Ecologia Agraria, Cartoline macrosismiche, novembre 1894, n.4, Lettera del direttore dell’Osservatorio Meteorologico di Tropea al direttore dell’Ufficio Centrale di Meteorologia e Geodinamica di Roma relativa al terremoto del 16 novembre 1894, Tropea 17 novembre 1894.                        |                           |                                                                                                                                                                                                                                                                                                                                                                                                                                                                                                                                                                                                                |                                                                                                                                                                                                                                                                                                                                                                                                                                                                                                                                                                                               |                           |
| Archivio dell’Ufficio Centrale di Ecologia Agraria, Cartoline macrosismiche, novembre 1894, n.75, Cartolina macrosismica relativa al terremoto del 16 novembre 1894 inviata all’Ufficio Centrale di Meteorologia e Geodinamica di Roma, Lipari 18 novembre 1894.                                                                      |                           |                                                                                                                                                                                                                                                                                                                                                                                                                                                                                                                                                                                                                |                                                                                                                                                                                                                                                                                                                                                                                                                                                                                                                                                                                               |                           |
| Archivio dell’Ufficio Centrale di Ecologia Agraria, Cartoline macrosismiche, novembre 1894, n.69, Cartolina macrosismica relativa al terremoto del 16 novembre 1894 inviata all’Ufficio Centrale di Meteorologia e Geodinamica di Roma, Maiori 18 novembre 1894                                                                       |                           |                                                                                                                                                                                                                                                                                                                                                                                                                                                                                                                                                                                                                |                                                                                                                                                                                                                                                                                                                                                                                                                                                                                                                                                                                               |                           |
| Archivio dell’Ufficio Centrale di Ecologia Agraria, Cartoline macrosismiche, novembre 1894, n.68, Lettera del direttore della Stazione termo-pluviometrica di Melilli al direttore dell’Ufficio Centrale di Meteorologia e Geodinamica di Roma relativa al terremoto del 16 novembre 1894, Melilli 18 novembre 1894.                  |                           |                                                                                                                                                                                                                                                                                                                                                                                                                                                                                                                                                                                                                |                                                                                                                                                                                                                                                                                                                                                                                                                                                                                                                                                                                               |                           |
| Archivio dell’Ufficio Centrale di Ecologia Agraria, Cartoline macrosismiche, novembre 1894, n.38, Telegramma del direttore dell’Osservatorio di Radicena al direttore dell’Ufficio Centrale di Meteorologia e Geodinamica di Roma relativo al terremoto del 16 novembre 1894, Radicena 18 novembre 1894.                              |                           |                                                                                                                                                                                                                                                                                                                                                                                                                                                                                                                                                                                                                |                                                                                                                                                                                                                                                                                                                                                                                                                                                                                                                                                                                               |                           |
| Archivio dell’Ufficio Centrale di Ecologia Agraria, Cartoline macrosismiche, novembre 1894, n.28, Cartolina macrosismica relativa al terremoto del 16 novembre 1894 inviata all’Ufficio Centrale di Meteorologia e Geodinamica di Roma, Salina 18 novembre 1894.                                                                      |                           |                                                                                                                                                                                                                                                                                                                                                                                                                                                                                                                                                                                                                |                                                                                                                                                                                                                                                                                                                                                                                                                                                                                                                                                                                               |                           |
| Archivio dell’Ufficio Centrale di Ecologia Agraria, Cartoline macrosismiche, novembre 1894, n.5, Cartolina macrosismica relativa al terremoto del 16 novembre 1894 inviata all’Ufficio Centrale di Meteorologia e Geodinamica di Roma, Tiriolo 18 novembre 1894.                                                                      |                           |                                                                                                                                                                                                                                                                                                                                                                                                                                                                                                                                                                                                                |                                                                                                                                                                                                                                                                                                                                                                                                                                                                                                                                                                                               |                           |
| Archivio dell’Ufficio Centrale di Ecologia Agraria, Cartoline macrosismiche, novembre 1894, n.67, Lettera del direttore dell’Osservatorio meteorico-astronomico provinciale di Messina al direttore dell’Ufficio Centrale di Meteorologia e Geodinamica di Roma relativa al terremoto del 16 novembre 1894, Messina 19 novembre 1894. |                           |                                                                                                                                                                                                                                                                                                                                                                                                                                                                                                                                                                                                                |                                                                                                                                                                                                                                                                                                                                                                                                                                                                                                                                                                                               |                           |
| Archivio di Stato di Reggio Calabria, Prefettura, Atti del terremoto del 1894, b.1, fasc.4, Lettera di un Consigliere comunale di Africo al Prefetto di Reggio Calabria relativa ai danni causati nel Comune dal terremoto del 16 novembre 1894, Africo 20 novembre 1894.                                                             |                           |                                                                                                                                                                                                                                                                                                                                                                                                                                                                                                                                                                                                                |                                                                                                                                                                                                                                                                                                                                                                                                                                                                                                                                                                                               |                           |
| Archivio dell’Ufficio Centrale di Ecologia Agraria, Cartoline macrosismiche, novembre 1894, n.112, Cartolina macrosismica relativa al terremoto del 16 novembre 1894 inviata all’Ufficio Centrale di Meteorologia e Geodinamica di Roma, Ardore 20 novembre 1894.                                                                     |                           |                                                                                                                                                                                                                                                                                                                                                                                                                                                                                                                                                                                                                |                                                                                                                                                                                                                                                                                                                                                                                                                                                                                                                                                                                               |                           |

|                                                                                                                                                                                                                                                                                                                                                                                  |
|----------------------------------------------------------------------------------------------------------------------------------------------------------------------------------------------------------------------------------------------------------------------------------------------------------------------------------------------------------------------------------|
| Archivio dell’Ufficio Centrale di Ecologia Agraria, Cartoline macrosismiche, novembre 1894, n.58, Cartolina macrosismica relativa al terremoto del 16 novembre 1894 inviata all’Ufficio Centrale di Meteorologia e Geodinamica di Roma, Oppido Mamertina 20 novembre 1894.                                                                                                       |
| Archivio dell’Ufficio Centrale di Ecologia Agraria, Cartoline macrosismiche, novembre 1894, n.107, Cartolina macrosismica relativa al terremoto del 16 novembre 1894 inviata all’Ufficio Centrale di Meteorologia e Geodinamica di Roma, Borgia 21 novembre 1894.                                                                                                                |
| Archivio dell’Ufficio Centrale di Ecologia Agraria, Cartoline macrosismiche, novembre 1894, n.93, Cartolina macrosismica relativa al terremoto del 16 novembre 1894 inviata all’Ufficio Centrale di Meteorologia e Geodinamica di Roma, Cortale 21 novembre 1894.                                                                                                                |
| Archivio dell’Ufficio Centrale di Ecologia Agraria, Cartoline macrosismiche, novembre 1894, n.71, Cartolina macrosismica relativa al terremoto del 16 novembre 1894 inviata all’Ufficio Centrale di Meteorologia e Geodinamica di Roma, Melito di Porto Salvo 21 novembre 1894                                                                                                   |
| Archivio dell’Ufficio Centrale di Ecologia Agraria, Cartoline macrosismiche, novembre 1894, n.6, Cartolina macrosismica relativa al terremoto del 16 novembre 1894 inviata all’Ufficio Centrale di Meteorologia e Geodinamica di Roma, Stromboli 21 novembre 1894.                                                                                                               |
| Archivio dell’Ufficio Centrale di Ecologia Agraria, Cartoline macrosismiche, novembre 1894, n.106, Cartolina macrosismica relativa al terremoto del 16 novembre 1894 inviata all’Ufficio Centrale di Meteorologia e Geodinamica di Roma, Briatico 22 novembre 1894.                                                                                                              |
| Archivio dell’Ufficio Centrale di Ecologia Agraria, Cartoline macrosismiche, novembre 1894, n.90, Cartolina macrosismica relativa al terremoto del 16 novembre 1894 inviata all’Ufficio Centrale di Meteorologia e Geodinamica di Roma, Filadelfia 22 novembre 1894.                                                                                                             |
| Archivio dell’Ufficio Centrale di Ecologia Agraria, Cartoline macrosismiche, novembre 1894, n.86, Cartolina macrosismica relativa al terremoto del 16 novembre 1894 inviata all’Ufficio Centrale di Meteorologia e Geodinamica di Roma, Gallina 22 novembre 1894.                                                                                                                |
| Archivio dell’Ufficio Centrale di Ecologia Agraria, Cartoline macrosismiche, novembre 1894, n.15, Cartolina macrosismica relativa al terremoto del 16 novembre 1894 inviata all’Ufficio Centrale di Meteorologia e Geodinamica di Roma, Seminara 22 novembre 1894.                                                                                                               |
| Archivio dell’Ufficio Centrale di Ecologia Agraria, Cartoline macrosismiche, novembre 1894, n.19, Cartolina macrosismica relativa al terremoto del 16 novembre 1894 inviata all’Ufficio Centrale di Meteorologia e Geodinamica di Roma, Saponara Villafranca 23 novembre 1894.                                                                                                   |
| Archivio dell’Ufficio Centrale di Ecologia Agraria, Cartoline macrosismiche, novembre 1894, n.10, Cartolina macrosismica relativa al terremoto del 16 novembre 1894 inviata all’Ufficio Centrale di Meteorologia e Geodinamica di Roma, Soriano Calabro 24 novembre 1894.                                                                                                        |
| Archivio dell’Ufficio Centrale di Ecologia Agraria, Cartoline macrosismiche, novembre 1894, n.13, Cartolina macrosismica relativa al terremoto del 16 novembre 1894 inviata all’Ufficio Centrale di Meteorologia e Geodinamica di Roma, Siderno 25 novembre 1894.                                                                                                                |
| Archivio dell’Ufficio Centrale di Ecologia Agraria, Cartoline macrosismiche, novembre 1894, n.104, Cartolina macrosismica relativa al terremoto del 16 novembre 1894 inviata all’Ufficio Centrale di Meteorologia e Geodinamica di Roma, Calanna s.d.                                                                                                                            |
| Archivio dell’Ufficio Centrale di Ecologia Agraria, Cartoline macrosismiche, novembre 1894, n.96, Cartolina macrosismica relativa al terremoto del 16 novembre 1894 inviata all’Ufficio Centrale di Meteorologia e Geodinamica di Roma, Caulonia s.d.                                                                                                                            |
| Archivio dell’Ufficio Centrale di Ecologia Agraria, Cartoline macrosismiche, novembre 1894, n.94, Cartolina macrosismica relativa al terremoto del 16 novembre 1894 inviata all’Ufficio Centrale di Meteorologia e Geodinamica di Roma, Cittanova s.d.                                                                                                                           |
| Archivio dell’Ufficio Centrale di Ecologia Agraria, Cartoline macrosismiche, novembre 1894, n.91, Cartolina macrosismica relativa al terremoto del 16 novembre 1894 inviata all’Ufficio Centrale di Meteorologia e Geodinamica di Roma, Cropani s.d.                                                                                                                             |
| Archivio dell’Ufficio Centrale di Ecologia Agraria, Cartoline macrosismiche, novembre 1894, n.72, Cartolina macrosismica relativa al terremoto del 16 novembre 1894 inviata all’Ufficio Centrale di Meteorologia e Geodinamica di Roma, Maierato s.d.                                                                                                                            |
| Archivio dell’Ufficio Centrale di Ecologia Agraria, Cartoline macrosismiche, novembre 1894, n.70, Cartolina macrosismica relativa al terremoto del 16 novembre 1894 inviata all’Ufficio Centrale di Meteorologia e Geodinamica di Roma, Mammola s.d.                                                                                                                             |
| Archivio dell’Ufficio Centrale di Ecologia Agraria, Cartoline macrosismiche, novembre 1894, n.42, Cartolina macrosismica relativa al terremoto del 16 novembre 1894 inviata all’Ufficio Centrale di Meteorologia e Geodinamica di Roma, Plati s.d.                                                                                                                               |
| Archivio dell’Ufficio Centrale di Ecologia Agraria, Cartoline macrosismiche, novembre 1894, n.27, Cartolina macrosismica relativa al terremoto del 16 novembre 1894 inviata all’Ufficio Centrale di Meteorologia e Geodinamica di Roma, Sambiasi s.d.                                                                                                                            |
| Archivio dell’Ufficio Centrale di Ecologia Agraria, Cartoline macrosismiche, novembre 1894, n.24, Cartolina macrosismica relativa al terremoto del 16 novembre 1894 inviata all’Ufficio Centrale di Meteorologia e Geodinamica di Roma, San Luca s.d.                                                                                                                            |
| Archivio dell’Ufficio Centrale di Ecologia Agraria, Cartoline macrosismiche, novembre 1894, n.23, Cartolina macrosismica relativa al terremoto del 16 novembre 1894 inviata all’Ufficio Centrale di Meteorologia e Geodinamica di Roma, Sant’Eufemia d’Aspromonte s.d.                                                                                                           |
| Archivio dell’Ufficio Centrale di Ecologia Agraria, Cartoline macrosismiche, novembre 1894, n.21, Cartolina macrosismica relativa al terremoto del 16 novembre 1894 inviata all’Ufficio Centrale di Meteorologia e Geodinamica di Roma, Santo Stefano in Aspromonte s.d.                                                                                                         |
| Archivio dell’Ufficio Centrale di Ecologia Agraria, Cartoline macrosismiche, novembre 1894, n.8, Cartolina macrosismica relativa al terremoto del 16 novembre 1894 inviata all’Ufficio Centrale di Meteorologia e Geodinamica di Roma, Stilo s.d.                                                                                                                                |
| Archivio di Stato di Reggio Calabria, Prefettura, Atti del terremoto del 1894, b.1, fasc.19, Lettera del Sindaco di Bagnara Calabra al Prefetto relativa ai danni causati nel Comune dal terremoto del 16 novembre, Bagnara Calabra 17 novembre 1894.                                                                                                                            |
| Archivio di Stato di Reggio Calabria, Prefettura, Atti del terremoto del 1894, b.5, fasc.313, Telegramma del Sottoprefetto di Gerace al Prefetto relativo ai danni causati dal terremoto del 16 novembre 1894 nei Comuni del Circondario, Gerace 17 novembre 1894.                                                                                                               |
| Archivio di Stato di Reggio Calabria, Prefettura, Atti del terremoto del 1894, b.4, fasc.241, Telegramma del Vice Pretore di Sant’Eufemia d’Aspromonte relativo ai danni causati nel Comune dal terremoto del 16 novembre, Sant’Eufemia d’Aspromonte 17 novembre 1894.                                                                                                           |
| Archivio di Stato di Reggio Calabria, Prefettura, Atti del terremoto del 1894, b.5, fasc.313, Minuta di telegramma del Prefetto al Ministro dell’Interno relativo ai danni causati nei Comuni della Provincia dal terremoto del 16 novembre, Reggio Calabria 18 novembre 1894                                                                                                    |
| Archivio di Stato di Reggio Calabria, Prefettura, Atti del terremoto del 1894, b.4, fasc.241, Lettera del Sindaco di Sant’Eufemia d’Aspromonte al Prefetto relativa ai danni causati nel Comune dal terremoto del 16 novembre, Sant’Eufemia d’Aspromonte 18 novembre 1894.                                                                                                       |
| Archivio di Stato di Reggio Calabria, Prefettura, Atti del terremoto del 1894, b.4, fasc.241, Telegramma di un Consigliere provinciale al Prefetto relativo ai danni causati nel Comune di Sant’Eufemia d’Aspromonte dal terremoto del 16 novembre, Sant’Eufemia d’Aspromonte 18 novembre 1894.                                                                                  |
| Archivio di Stato di Reggio Calabria, Prefettura, Atti del terremoto del 1894, b.4, fasc.268, Telegramma del Sindaco di Seminara al Prefetto relativo ai danni causati nel Comune dal terremoto del 16 novembre, Seminara 18 novembre 1894.                                                                                                                                      |
| Archivio di Stato di Reggio Calabria, Prefettura, Atti del terremoto del 1894, b.2, fasc.144, Telegramma del Sottoprefetto di Palmi al Prefetto relativo ai danni subiti dall’edificio della Sottoprefettura a causa del terremoto del 16 novembre, Palmi 19 novembre 1894.                                                                                                      |
| Archivio di Stato di Reggio Calabria, Prefettura, Atti del terremoto del 1894, b.5, fasc.313, Minuta di telegramma del Prefetto al Ministro dell’Interno relativo ai danni causati nei Comuni della Provincia dal terremoto del 16 novembre, Reggio Calabria 19 novembre 1894                                                                                                    |
| Archivio di Stato di Reggio Calabria, Prefettura, Atti del terremoto del 1894, b.1, fasc.94, Lettera del Sindaco di Gallina al Prefetto relativa ai danni causati nel Comune dal terremoto del 16 novembre, Gallina 20 novembre 1894.                                                                                                                                            |
| Archivio di Stato di Reggio Calabria, Prefettura, Atti del terremoto del 1894, b.5, fasc.313, Relazione del Sottoprefetto di Gerace al Prefetto sui danni causati dal terremoto del 16 novembre 1894 nei Comuni del Circondario, Gerace 20 novembre 1894.                                                                                                                        |
| Archivio di Stato di Reggio Calabria, Prefettura, Atti del terremoto del 1894, b.5, fasc.319, Telegramma del Sottoprefetto di Palmi al Prefetto relativo ai danni causati nei Comuni del Circondario dal terremoto del 16 novembre, Palmi 20 novembre 1894.                                                                                                                      |
| Archivio di Stato di Reggio Calabria, Prefettura, Atti del terremoto del 1894, b.5, fasc.313, Minuta di lettera del Prefetto al Presidente della Deputazione Provinciale di Reggio Calabria relativa ai danni causati nei Comuni della Provincia dal terremoto del 16 novembre 1894, Reggio Calabria 20 novembre 1894.                                                           |
| Archivio di Stato di Reggio Calabria, Prefettura, Atti del terremoto del 1894, b.5, fasc.313, Minute di telegrammi del Prefetto al Ministro dell’Interno relativi ai danni causati nei Comuni della Provincia dal terremoto del 16 novembre, Reggio Calabria 20 novembre 1894.                                                                                                   |
| Archivio di Stato di Reggio Calabria, Prefettura, Atti del terremoto del 1894, b.5, fasc.313, Elenco dei danneggiati dal terremoto avvenuto la sera del 16 Nov[embre] ’94 nel Comune di Ferruzzano, Ferruzzano 21 novembre 1894.                                                                                                                                                 |
| Archivio di Stato di Reggio Calabria, Prefettura, Atti del terremoto del 1894, b.2, fasc.154, Lettera del Sindaco di Pellaro al Prefetto relativa ai danni causati nel Comune dal terremoto del 16 novembre, Pellaro 21 novembre 1894.                                                                                                                                           |
| Archivio di Stato di Reggio Calabria, Prefettura, Atti del terremoto del 1894, b.4, fasc.231, Elenco nominativo delle famiglie [del Comune di Sant’Alessio in Aspromonte] che ebbero danneggiate e quasi distrutte le case d’abitazione, mercé il tremoto verificatosi la sera del di 16 corrente Novembre e da altri in prosiegua, Sant’Alessio in Aspromonte 21 novembre 1894. |
| Archivio di Stato di Reggio Calabria, Prefettura, Atti del terremoto del 1894, b.1, fasc.107, Lettera del Sindaco di Iatrinoli al Prefetto relativa ai danni causati nel Comune dal terremoto del 16 novembre, Iatrinoli 22 novembre 1894.                                                                                                                                       |
| Archivio di Stato di Reggio Calabria, Prefettura, Atti del terremoto del 1894, b.5, fasc.313, Relazione dell’Ingegnere Capo del Genio Civile al Prefetto sui danni causati dal terremoto del 16 novembre nei Comuni di Radicena e Iatrinoli, Reggio Calabria 22 novembre 1894.                                                                                                   |
| Archivio di Stato di Reggio Calabria, Prefettura, Atti del terremoto del 1894, b.4, fasc.227, Lettera del Sindaco di Sant’Agata del Bianco al Prefetto relativa ai danni causati nel Comune dal terremoto del 16 novembre, Sant’Agata del Bianco 22 novembre 1894.                                                                                                               |



|                                                                                                                                                                                                                                                                                                           |
|-----------------------------------------------------------------------------------------------------------------------------------------------------------------------------------------------------------------------------------------------------------------------------------------------------------|
| Archivio di Stato di Reggio Calabria, Prefettura, Atti del terremoto del 1894, b.1, fasc.49, Relazione dell’Ingegnere Capo del Genio Civile al Prefetto sui danni causati dal terremoto del 16 novembre nel Comune di Campo Calabro, Reggio Calabria 23 novembre 1894.                                    |
| Archivio di Stato di Reggio Calabria, Prefettura, Atti del terremoto del 1894, b.2, fasc.133, Telegramma degli abitanti di Castellace al Prefetto relativo alla situazione del paese in seguito al terremoto del 16 novembre 1894, Varapodio 24 novembre 1894                                             |
| Archivio di Stato di Reggio Calabria, Prefettura, Atti del terremoto del 1894, b.1, fasc.27, Elenco delle persone rimaste vittime dei terremoti del 16 volgente nel Comune di Bagnara Calabra, Bagnara Calabria 25 novembre 1894.                                                                         |
| Archivio di Stato di Reggio Calabria, Prefettura, Atti del terremoto del 1894, b.1, fasc.60, Lettera del Sindaco di Cardeto al Prefetto relativa ai danni causati nel Comune dal terremoto del 16 novembre, Cardeto 25 novembre 1894.                                                                     |
| Archivio di Stato di Reggio Calabria, Prefettura, Atti del terremoto del 1894, b.5, fasc.313, Relazione del Sottoprefetto di Gerace al Prefetto sui danni causati dal terremoto del 16 novembre 1894 nei Comuni del Circondario, Gerace 25 novembre 1894.                                                 |
| Archivio di Stato di Reggio Calabria, Prefettura, Atti del terremoto del 1894, b.5, fasc.313, Relazione dell’Ingegnere Capo del Genio Civile al Prefetto sui danni causati dal terremoto del 16 novembre nei Comuni di Scido e Santa Cristina d’Aspromonte, Reggio Calabria 25 novembre 1894.             |
| Archivio di Stato di Reggio Calabria, Prefettura, Atti del terremoto del 1894, b.2, fasc.163, Telegramma del Sottoprefetto di Gerace al Prefetto relativo ai danni causati nel Comune di Plati dal terremoto del 16 novembre, Bovalino Marina 27 novembre 1894                                            |
| Archivio di Stato di Reggio Calabria, Prefettura, Atti del terremoto del 1894, b.4, fasc.273, Elenco dei morti e feriti [del Comune di Seminara] a causa del tremuoto del 16 Novembre 1894, Seminara 27 novembre 1894.                                                                                    |
| Archivio di Stato di Reggio Calabria, Prefettura, Atti del terremoto del 1894, b.1, fasc.85, Elenco dello ammontare presuntivo delle case danneggiate dal Tremoto [del] 16 Novembre in Fiumara, redatto dalla Commissione Comunale per i terremoti, Fiumara 29 novembre 1894.                             |
| Archivio di Stato di Reggio Calabria, Prefettura, Atti del terremoto del 1894, b.5, fasc.313, Relazione del Sottoprefetto di Gerace al Prefetto sui danni causati dal terremoto del 16 novembre 1894 nei Comuni del Circondario, Gerace 28 novembre 1894.                                                 |
| Archivio di Stato di Reggio Calabria, Prefettura, Atti del terremoto del 1894, b.1, fasc.64, Relazione dell’Ingegnere Capo del Genio Civile al Prefetto sui danni causati dal terremoto del 16 novembre nel Comune di Cataforio, Reggio Calabria 29 novembre 1894.                                        |
| Archivio di Stato di Reggio Calabria, Prefettura, Atti del terremoto del 1894, b.4, fasc.206, Relazione del Comitato per la verifica dei fabbricati danneggiati dal terremoto del 16 novembre 1894 nel Comune di Salice Calabro, Salice Calabro 1 dicembre 1894.                                          |
| Archivio di Stato di Reggio Calabria, Prefettura, Atti del terremoto del 1894, b.1, fasc.33, Relazione dell’Ingegnere Capo del Genio Civile al Prefetto sui danni causati dal terremoto del 16 novembre nel Comune di Bova, Reggio Calabria 1 dicembre 1894.                                              |
| Archivio di Stato di Reggio Calabria, Prefettura, Atti del terremoto del 1894, b.5, fasc.313, Relazione dell’Ingegnere Capo del Genio Civile al Prefetto sui danni causati dal terremoto del 16 novembre nei Comuni di Maropati, Galatro e Cinquefrondi, Reggio Calabria 1 dicembre 1894.                 |
| Archivio di Stato di Reggio Calabria, Prefettura, Atti del terremoto del 1894, b.4, fasc.223, Elenco delle persone decedute in questo Comune [di San Procopio] nella catastrofe del terremoto avvenuta il giorno 16 Novembre 1894, San Procopio 4 dicembre 1894.                                          |
| Archivio di Stato di Reggio Calabria, Prefettura, Atti del terremoto del 1894, b.2, fasc.144, Relazione dell’Ingegnere Capo del Genio Civile al Prefetto sullo stato dell’edificio del Carcere di Palmi danneggiato dal terremoto del 16 novembre, Reggio Calabria 8 dicembre 1894                        |
| Archivio di Stato di Reggio Calabria, Prefettura, Atti del terremoto del 1894, b.2, fasc.123, Lettera del Sindaco di Melito di Porto Salvo al Prefetto relativa ai danni causati nel Comune dal terremoto del 16 novembre, Melito di Porto Salvo 9 dicembre 1894.                                         |
| Archivio di Stato di Reggio Calabria, Prefettura, Atti del terremoto del 1894, b.2, fasc.123, Lettera del Sindaco di Melito di Porto Salvo al Prefetto relativa al crollo di due fabbricati danneggiati dal terremoto del 16 novembre, Melito di Porto Salvo 9 dicembre 1894.                             |
| Archivio di Stato di Reggio Calabria, Prefettura, Atti del terremoto del 1894, b.1, fasc.44, Relazione dell’Ingegnere Capo del Genio Civile al Prefetto sui danni causati dal terremoto del 16 novembre nel Comune di Calanna, Reggio Calabria 9 dicembre 1894.                                           |
| Archivio di Stato di Reggio Calabria, Prefettura, Atti del terremoto del 1894, b.4, fasc.211, Relazione dell’Ingegnere Capo del Genio Civile al Prefetto sui danni causati dal terremoto del 16 novembre nel Comune di Sambatello, Reggio Calabria 9 dicembre 1894.                                       |
| Archivio di Stato di Reggio Calabria, Prefettura, Atti del terremoto del 1894, b.1, fasc.85, Lettera del Sindaco di Fiumara al Prefetto relativa all’invio dell’elenco dei danni causati nel Comune dal terremoto del 16 novembre, Fiumara 10 dicembre 1894.                                              |
| Archivio di Stato di Reggio Calabria, Prefettura, Atti del terremoto del 1894, b.3, fasc.198, Relazione dell’Ingegnere Capo del Genio Civile al Prefetto sui danni causati dal terremoto del 16 novembre nel Comune di Rosali, Reggio Calabria 10 dicembre 1894.                                          |
| Archivio di Stato di Reggio Calabria, Prefettura, Atti del terremoto del 1894, b.4, fasc.213, Relazione dell’Ingegnere Capo del Genio Civile al Prefetto sui danni causati dal terremoto del 16 novembre nel Comune di San Giorgio Morgeto, Reggio Calabria 11 dicembre 1894.                             |
| Archivio di Stato di Reggio Calabria, Prefettura, Atti del terremoto del 1894, b.1, fasc.76, Lettera del Sottoprefetto del Circondario di Palmi al Prefetto relativa ai danni causati nel Comune di Cittanova dal terremoto del 16 novembre, Palmi 12 dicembre 1894.                                      |
| Archivio di Stato di Reggio Calabria, Prefettura, Atti del terremoto del 1894, b.1, fasc.101, Elenco degli edifici di Giffone danneggiati dal terremoto del 16 novembre 1894 e degli interventi di riparazione necessari, redatto dall’ingegnere A. Bindacci, Giffone 14 dicembre 1894.                   |
| Archivio di Stato di Reggio Calabria, Prefettura, Atti del terremoto del 1894, b.1, fasc.111, Relazione dell’Ingegnere Capo del Genio Civile al Prefetto sui danni causati dal terremoto del 16 novembre nel Comune di Laganadi, Reggio Calabria 14 dicembre 1894.                                        |
| Archivio di Stato di Reggio Calabria, Prefettura, Atti del terremoto del 1894, b.1, fasc.29, Relazione riflettente i danni prodotti dal terremoto il 16 Novembre 1894 nel Comune di Benestare, redatta dall’architetto G. Antico, Siderno 17 dicembre 1894.                                               |
| Archivio di Stato di Reggio Calabria, Prefettura, Atti del terremoto del 1894, b.1, fasc.41, Lettera dell’ingegnere del Genio civile A. Michieli al prefetto sui danni causati dal terremoto alla chiesa parrocchiale dell’Annunziata di Bruzzano, Reggio Calabria 18 dicembre 1894.                      |
| Archivio di Stato di Reggio Calabria, Prefettura, Atti del terremoto del 1894, b.1, fasc.37, Relazione riguardante i danni prodotti dal terremoto all’abitato di Bovalino Superiore nel giorno 16 Novembre 1894, redatta dall’architetto G. Antico, Siderno 19 dicembre 1894.                             |
| Archivio di Stato di Reggio Calabria, Prefettura, Atti del terremoto del 1894, b.1, fasc.7, Relazione di un Ufficiale del Genio Civile al Prefetto sui danni causati dal terremoto del 16 novembre 1894 nel Comune di Anoia, Reggio Calabria 20 dicembre 1894.                                            |
| Archivio di Stato di Reggio Calabria, Prefettura, Atti del terremoto del 1894, b.1, fasc.11, Relazione sui danni prodotti [nella frazione San Nicola del Comune di Ardore] dal terremoto venuto nel 16 Novembre 1894, redatta dall’architetto G. Antico, Siderno 22 dicembre 1894.                        |
| Archivio di Stato di Reggio Calabria, Prefettura, Atti del terremoto del 1894, b.1, fasc.83, Relazione sui danni causati dal terremoto avvenuto il 16 Novembre 1894 nel Comune di Ferruzzano, redatta dall’architetto G. Antico, Siderno 22 dicembre 1894.                                                |
| Archivio di Stato di Reggio Calabria, Prefettura, Atti del terremoto del 1894, b.1, fasc.37, Relazione tecnica sommaria dei danni causati dal terremoto del 16 novembre nel Comune di Bovalino Marina, redatta dall’ingegnere A. Mazzoni, Siderno 23 dicembre 1894.                                       |
| Archivio di Stato di Reggio Calabria, Prefettura, Atti del terremoto del 1894, b.4, fasc.227, Relazione tecnica sommaria dei danni causati dal terremoto del 16 novembre nel Comune di Sant’Agata del Bianco, redatta dall’ingegnere A. Mazzoni, Siderno 23 dicembre 1894.                                |
| Archivio di Stato di Reggio Calabria, Prefettura, Atti del terremoto del 1894, b.1, fasc.11, Relazione tecnica sommaria dei danni causati dal terremoto del 16 novembre nel Comune di Ardore, redatta dall’ingegnere A. Mazzoni, Siderno 24 dicembre 1894.                                                |
| Archivio di Stato di Reggio Calabria, Prefettura, Atti del terremoto del 1894, b.1, fasc.71, Relazione circa i danni prodotti dal terremoto del 16 Novembre 1894 nel Comune di Ciminà, redatta dall’architetto G. Antico, Siderno 24 dicembre 1894.                                                       |
| Archivio di Stato di Reggio Calabria, Prefettura, Atti del terremoto del 1894, b.1, fasc.62, Relazione sommaria riflettente i danni causati dal terremoto del 16 Novembre 1894 nel Comune di Casignana, redatta dall’architetto G. Antico, Siderno 25 dicembre 1894.                                      |
| Archivio di Stato di Reggio Calabria, Prefettura, Atti del terremoto del 1894, b.1, fasc.59, Relazione tecnica sommaria dei danni causati dal terremoto del 16 novembre nel Comune di Caraffa del Bianco, redatta dall’ingegnere A. Mazzoni, Siderno 26 dicembre 1894.                                    |
| Archivio di Stato di Reggio Calabria, Prefettura, Atti del terremoto del 1894, b.1, fasc.13, Statino degli Edifizi pubblici e privati [di Bagaladi] danneggiati dai recenti tremoti [del 16 novembre] minaccianti rovina o pericolo, ed estimo del Danno, Bagaladi 28 dicembre 1894.                      |
| Archivio di Stato di Reggio Calabria, Prefettura, Atti del terremoto del 1894, b.4, fasc.291, Telegramma del Sottosegretario del Ministero dell’Interno al Prefetto relativo alla situazione della chiesa parrocchiale di Tresilico crollata a causa del terremoto del 16 novembre, Roma 28 dicembre 1894 |
| Archivio di Stato di Reggio Calabria, Prefettura, Atti del terremoto del 1894, b.4, fasc.291, Telegramma del Sottoprefetto di Palmi al Prefetto relativo ai soccorsi inviati nel Comune di Tresilico in seguito al terremoto del 16 novembre, Palmi 29 dicembre 1894.                                     |
| Archivio di Stato di Reggio Calabria, Prefettura, Atti del terremoto del 1894, b.4, fasc.276, Relazione sui danni prodotti [nel Comune di Siderno] dal terremoto nel giorno 16 Novembre 1894, redatta dall’ingegnere A. Mazzoni, Siderno 29 dicembre 1894.                                                |
| Archivio di Stato di Reggio Calabria, Prefettura, Atti del terremoto del 1894, b.1, fasc.105, Relazione dell’Ingegnere Capo del Genio Civile al Prefetto sui danni causati dal terremoto del 16 novembre 1894 nel Comune di Grotteria, Reggio Calabria 14 gennaio 1895.                                   |
| Archivio di Stato di Reggio Calabria, Prefettura, Atti del terremoto del 1894, b.1, fasc.17, Lettera dell’ingegnere capo del Genio civile G. Rossi al prefetto sui danni causati dal terremoto alle chiese di S. Teodoro e dell’Annunziata di Bagaladi, Reggio Calabria 1° febbraio 1895.                 |

|                                                                                                                                                                                                                                                                 |
|-----------------------------------------------------------------------------------------------------------------------------------------------------------------------------------------------------------------------------------------------------------------|
| Archivio di Stato di Reggio Calabria, Prefettura, Atti del terremoto del 1894, b.4, fasc.253, Relazione dei danni nel Comune di S. Stefano causati dal terremoto del 16 [nove]mbre e seguenti, redatta dal perito R. Chiudemi, Santo Stefano in Aspromonte s.d. |
| Giornale di Sicilia, 1894.11.19/20. Palermo                                                                                                                                                                                                                     |
| Giornale di Sicilia, 1894.11.23/24. Palermo                                                                                                                                                                                                                     |
| Giornale di Sicilia, 1894.11.24/25. Palermo                                                                                                                                                                                                                     |
| Giornale di Sicilia, 1894.11.26/27. Palermo                                                                                                                                                                                                                     |
| Riccò A. (1897) Il terremoto del 16 novembre 1894 in Calabria e Sicilia. Parte I: Relazione sismologica. Annali dell'Ufficio Centrale Meteorologico e Geodinamico Italiano, s.II, vol.19, parte I, pp.7-261. Roma                                               |

| <b>Table S4</b><br><b>1908 (Mw 6.83) SOUTHERN-CALABRIA – NORTHERN SICILY</b>                                                                                                                                                                                                                                                                                                                                                                                                                                                                                               |               |                                                                                                                                                                                                                                                                                                                                                                                                                                                                                                                                                                                                                                                                                                                                                                                                                                                                                                                                                                                                                                                                                                                                                                                                                                                                                                                                                                                                                                                                                                                          |                                                                                                                                                                                                                                                                                                                                                                                                                                                                                                                                                                                                                                                                                                                                                                                                                                                                                                                                                                                                                                                                                                                                                                                                                                                                                                                                                                                                                                                               |                                                                      |
|----------------------------------------------------------------------------------------------------------------------------------------------------------------------------------------------------------------------------------------------------------------------------------------------------------------------------------------------------------------------------------------------------------------------------------------------------------------------------------------------------------------------------------------------------------------------------|---------------|--------------------------------------------------------------------------------------------------------------------------------------------------------------------------------------------------------------------------------------------------------------------------------------------------------------------------------------------------------------------------------------------------------------------------------------------------------------------------------------------------------------------------------------------------------------------------------------------------------------------------------------------------------------------------------------------------------------------------------------------------------------------------------------------------------------------------------------------------------------------------------------------------------------------------------------------------------------------------------------------------------------------------------------------------------------------------------------------------------------------------------------------------------------------------------------------------------------------------------------------------------------------------------------------------------------------------------------------------------------------------------------------------------------------------------------------------------------------------------------------------------------------------|---------------------------------------------------------------------------------------------------------------------------------------------------------------------------------------------------------------------------------------------------------------------------------------------------------------------------------------------------------------------------------------------------------------------------------------------------------------------------------------------------------------------------------------------------------------------------------------------------------------------------------------------------------------------------------------------------------------------------------------------------------------------------------------------------------------------------------------------------------------------------------------------------------------------------------------------------------------------------------------------------------------------------------------------------------------------------------------------------------------------------------------------------------------------------------------------------------------------------------------------------------------------------------------------------------------------------------------------------------------------------------------------------------------------------------------------------------------|----------------------------------------------------------------------|
| Description                                                                                                                                                                                                                                                                                                                                                                                                                                                                                                                                                                |               |                                                                                                                                                                                                                                                                                                                                                                                                                                                                                                                                                                                                                                                                                                                                                                                                                                                                                                                                                                                                                                                                                                                                                                                                                                                                                                                                                                                                                                                                                                                          |                                                                                                                                                                                                                                                                                                                                                                                                                                                                                                                                                                                                                                                                                                                                                                                                                                                                                                                                                                                                                                                                                                                                                                                                                                                                                                                                                                                                                                                               |                                                                      |
| An earthquake and following tsunami devastated southern Calabria and northeastern Sicily on December 28, 1908. The double catastrophe destroyed Messina, Reggio di Calabria, and dozens of nearby coastal towns. A main event in 30-40 s with I <sub>max</sub> 10-11 EMS and Mw = 7. Aftershocks lasted until the 1913, several shocks probably reached intensity 8 EMS, but it is not easy estimate intensity when most of buildings were nearly destroyed. The precise number of casualties due to the Messina earthquake remains uncertain (between 60,000 and 80,000). |               |                                                                                                                                                                                                                                                                                                                                                                                                                                                                                                                                                                                                                                                                                                                                                                                                                                                                                                                                                                                                                                                                                                                                                                                                                                                                                                                                                                                                                                                                                                                          |                                                                                                                                                                                                                                                                                                                                                                                                                                                                                                                                                                                                                                                                                                                                                                                                                                                                                                                                                                                                                                                                                                                                                                                                                                                                                                                                                                                                                                                               |                                                                      |
| Historical evidence of coseismic effects, reports and sources                                                                                                                                                                                                                                                                                                                                                                                                                                                                                                              |               |                                                                                                                                                                                                                                                                                                                                                                                                                                                                                                                                                                                                                                                                                                                                                                                                                                                                                                                                                                                                                                                                                                                                                                                                                                                                                                                                                                                                                                                                                                                          |                                                                                                                                                                                                                                                                                                                                                                                                                                                                                                                                                                                                                                                                                                                                                                                                                                                                                                                                                                                                                                                                                                                                                                                                                                                                                                                                                                                                                                                               |                                                                      |
| Event                                                                                                                                                                                                                                                                                                                                                                                                                                                                                                                                                                      | Location      | Evidence (in original language)                                                                                                                                                                                                                                                                                                                                                                                                                                                                                                                                                                                                                                                                                                                                                                                                                                                                                                                                                                                                                                                                                                                                                                                                                                                                                                                                                                                                                                                                                          | Evidence (translated)                                                                                                                                                                                                                                                                                                                                                                                                                                                                                                                                                                                                                                                                                                                                                                                                                                                                                                                                                                                                                                                                                                                                                                                                                                                                                                                                                                                                                                         | Source                                                               |
| 28.12.1908                                                                                                                                                                                                                                                                                                                                                                                                                                                                                                                                                                 | Ganzirri      | <i>“Ricordo a questo proposito che anche nel periodo sismico del 1783 si erano determinate nei pressi del Pantano delle fenditure, ed altre pure si sono aperte anche nel terremoto del 1894”. (Baratta, 1910-I parte). “Aperture nel terreno, formazione dei vulcanelli di fango”</i>                                                                                                                                                                                                                                                                                                                                                                                                                                                                                                                                                                                                                                                                                                                                                                                                                                                                                                                                                                                                                                                                                                                                                                                                                                   | "I recall in this regard that even in the seismic period of 1783 fissures had arisen near the Pantano, and others also opened up in the earthquake of 1894". "Openings in the ground, formation of small mud volcanoes"                                                                                                                                                                                                                                                                                                                                                                                                                                                                                                                                                                                                                                                                                                                                                                                                                                                                                                                                                                                                                                                                                                                                                                                                                                       | Baratta, 1910-I part<br>Romeo and Delfino, 1997;<br>Lo Giudice, 1909 |
|                                                                                                                                                                                                                                                                                                                                                                                                                                                                                                                                                                            | Messina       | <i>“Fenditure, avvallamenti e un generale scivolamento verso il mare si verificarono nelle banchine del porto e nelle zone adiacenti alla Marina; L'intera penisola falcata per compressione e assestamento dei materiali, in seguito al violentissimo fenomeno sismico ed al maremoto, si abbassò verso il centro la depressione raggiunse 40-50 cm”. “La lanterna del Forte S. Ranieri infine si sarebbe abbassata di m 0,51;</i>                                                                                                                                                                                                                                                                                                                                                                                                                                                                                                                                                                                                                                                                                                                                                                                                                                                                                                                                                                                                                                                                                      | “Fissures, depressions and a general sliding towards the sea occurred in the docks of the port and in the areas adjacent to the Marina; The entire crescent-shaped peninsula due to compression and settling of the materials, following the extremely violent earthquake and tsunami, sank towards the centre, the depression reaching 40-50cm". Finally, the lantern of Forte S. Ranieri would have lowered by 0.51 m.                                                                                                                                                                                                                                                                                                                                                                                                                                                                                                                                                                                                                                                                                                                                                                                                                                                                                                                                                                                                                                      | Baratta, 1910;<br>Platania, 1909;<br>Sauret and Bosquè, 1984         |
|                                                                                                                                                                                                                                                                                                                                                                                                                                                                                                                                                                            |               | <i>Nelle banchine del porto e nelle zone adiacenti alla Marina furono rilevate fenditure, avvallamenti e un generale scivolamento verso il mare. Nell'area tra i Magazzini generali e la Dogana il suolo risultò avvallato di circa 30 cm con varie fenditure, tutte o quasi parallele alla spiaggia; nelle vicinanze, lungo un binario morto, l'avvallamento raggiunse una profondità massima di circa 100-130 cm. Più a nord, nella zona compresa fra il Mercato e la sede della Sanità marittima, le fratture nel piano stradale, sempre parallele alla linea di costa, risultarono profonde 50 cm e larghe da 70 a 100 cm. Da alcune fenditure apertesi nel suolo della Real Cittadella fuoriuscì acqua mista a sabbia che formò intorno ai labbri una serie di piccoli rilievi; lo stesso avvenne da un'altra fenditura lungo la via Garibaldi. Modeste variazioni della linea di spiaggia furono rilevate nella parte meridionale della città e nella penisola falcata, che nella parte centrale risultò abbassata di 40-50 cm. Dalle livellazioni eseguite dall'Istituto Geografico Militare risultò un generale abbassamento del terreno di circa 37 cm in tutta la parte bassa della città; i rilievi effettuati da tecnici delle ferrovie constatarono un abbassamento costante del piano ferroviario di 47 cm a partire dalla stazione del ferryboat fino al ponte sulla fiumara Zaera; secondo le osservazioni fatte dal Genio civile, la torre della Lanterna di San Raineri risultò abbassata di 51 cm</i> | In the docks of the port and in the areas adjacent to the Marina, fissures, depressions and a general sliding towards the sea were found. In the area between the General Warehouses and the Customs House, the ground was subsided by about 30 cm with various fissures, all or almost parallel to the beach; nearby, along a siding, the depression reached a maximum depth of about 100-130 cm. Further north, in the area between the Market and the Maritime Health Office, the fractures in the street level, always parallel to the coastline, were 50 cm deep and 70 to 100 cm wide. From some fissures that opened in the ground of the Real Cittadella water came out mixed with sand which formed a series of small reliefs around the lips; the same happened from another fissure along via Garibaldi. Modest variations in the beach line were found in the southern part of the city and in the crescent-shaped peninsula, which was lowered by 40-50 cm in the central part. The leveling carried out by the Military Geographical Institute resulted in a general lowering of the land of about 37 cm throughout the lower part of the city; the surveys carried out by railway technicians noted a constant lowering of the railway floor of 47 cm starting from the ferryboat station up to the bridge over the Zaera river; according to the observations made by the Civil Engineers, the San Raineri Lantern tower was lowered by 51 cm | Baratta, 1910, 4                                                     |
|                                                                                                                                                                                                                                                                                                                                                                                                                                                                                                                                                                            |               | <i>“il terremoto attivò una frana che danneggiò le condutture dell'acquedotto”</i>                                                                                                                                                                                                                                                                                                                                                                                                                                                                                                                                                                                                                                                                                                                                                                                                                                                                                                                                                                                                                                                                                                                                                                                                                                                                                                                                                                                                                                       | “the earthquake triggered a landslide that damaged the aqueduct pipes”                                                                                                                                                                                                                                                                                                                                                                                                                                                                                                                                                                                                                                                                                                                                                                                                                                                                                                                                                                                                                                                                                                                                                                                                                                                                                                                                                                                        | Baratta, 1910                                                        |
|                                                                                                                                                                                                                                                                                                                                                                                                                                                                                                                                                                            |               | <i>“Presso il faro antico vi fu un abbassamento progressivo attuale del suolo, indicato dallo scalzamento operato dal mare alla base della torre del faro ed ai muri di cinta. Nella strada che da Faro Inferiore conduce a Granatari si trova, specie verso il Pantano, una fenditura longitudinale ed altre più o meno estese con abbassamento di circa 7cm. I muri pendono tutti verso l'interno, cioè verso S-W... La strada presso il Pantano si è sprofondata oppure più o meno affondata qua e là, si sono prodotte fenditure da cui è sprizzata una melma con spiccato odore di idrogeno solforoso”. “Ricordo a questo proposito che anche nel periodo sismico del 1783 si erano determinate nei pressi del Pantano delle fenditure, ed altre pure si sono aperte anche nel terremoto del 1894”</i>                                                                                                                                                                                                                                                                                                                                                                                                                                                                                                                                                                                                                                                                                                              | “At the ancient lighthouse there was a current progressive lowering of the ground, indicated by the undermining operated by the sea at the base of the lighthouse tower and the boundary walls. In the road that leads from Faro Inferiore to Granatari, especially towards the Pantano, there is a longitudinal fissure and other more or less extensive ones with a drop of about 7cm. The walls all hang inwards, i.e. towards SW... The road near the marsh has sunk here and there, fissures have appeared from which a slime with a strong smell of sulphurous hydrogen has sprung out". "I recall in this regard that even in the seismic period of 1783 fissures had arisen near the Pantano, and others also opened in the earthquake of 1894"                                                                                                                                                                                                                                                                                                                                                                                                                                                                                                                                                                                                                                                                                                       | Platania, 1909;<br>Baratta, 1910-I parte                             |
|                                                                                                                                                                                                                                                                                                                                                                                                                                                                                                                                                                            | Caltanissetta | <i>“In seguito al terremoto si produssero spaccature alle falde del monte S.Giuliano in direzione E-W”... “Si produssero spaccature alle falde del monte S. Giuliano”</i>                                                                                                                                                                                                                                                                                                                                                                                                                                                                                                                                                                                                                                                                                                                                                                                                                                                                                                                                                                                                                                                                                                                                                                                                                                                                                                                                                | “Following the earthquake, cracks were produced at the foot of Mount S. Giuliano in an E-W direction”... “Cracks were produced at the foot of Mount S. Giuliano”                                                                                                                                                                                                                                                                                                                                                                                                                                                                                                                                                                                                                                                                                                                                                                                                                                                                                                                                                                                                                                                                                                                                                                                                                                                                                              | Baratta, 1910                                                        |
|                                                                                                                                                                                                                                                                                                                                                                                                                                                                                                                                                                            | Ganzirri      | <i>“Questo lago era costeggiato da una rotabile che si è in parte fratturata, parallele o quasi alla spiaggia, risultarono profonde 5cm e larghe da 7 a 10 cm, una grande fenditura si aprì nel terreno al Forte San Salvatore... modeste variazioni della linea di spiaggia si verificarono nella penisola falcata antistante il porto e nella parte meridionale della città”.</i>                                                                                                                                                                                                                                                                                                                                                                                                                                                                                                                                                                                                                                                                                                                                                                                                                                                                                                                                                                                                                                                                                                                                      | “This lake was bordered by a roadway that partially fractured, parallel or almost to the beach, they turned out to be 5cm deep and 7 to 10cm wide, a large fissure opened in the ground at Forte San Salvatore... modest variations of the beach line occurred in the crescent-shaped peninsula in front of the port and in the southern part of the city”.                                                                                                                                                                                                                                                                                                                                                                                                                                                                                                                                                                                                                                                                                                                                                                                                                                                                                                                                                                                                                                                                                                   | Baratta, 1910                                                        |
|                                                                                                                                                                                                                                                                                                                                                                                                                                                                                                                                                                            |               | <i>“A completamento delle notizie già date, credo utile riportare queste altre che tolgo dalla relazione dell'Ing. S. Franchi solo ora venuta in luce nel Bollettino del R. Comitato Geologico. Riferisce adunque il Franchi che l'Ufficio delle Ferrovie dello</i>                                                                                                                                                                                                                                                                                                                                                                                                                                                                                                                                                                                                                                                                                                                                                                                                                                                                                                                                                                                                                                                                                                                                                                                                                                                      | "To complete the information already given, I think it is useful to report these others which I take away from the report by Eng. S. Franchi only now come to light in the Bollettino del Regio Comitato Geologico. Franchi therefore reports that the State Railways Office in Messina                                                                                                                                                                                                                                                                                                                                                                                                                                                                                                                                                                                                                                                                                                                                                                                                                                                                                                                                                                                                                                                                                                                                                                       | Baratta, 1910-II part                                                |

|  |                       |                                                                                                                                                                                                                                                                                                                                                                                                                                                                               |                                                                                                                                                                                                                                                                                                                                                                                                                                |                                  |
|--|-----------------------|-------------------------------------------------------------------------------------------------------------------------------------------------------------------------------------------------------------------------------------------------------------------------------------------------------------------------------------------------------------------------------------------------------------------------------------------------------------------------------|--------------------------------------------------------------------------------------------------------------------------------------------------------------------------------------------------------------------------------------------------------------------------------------------------------------------------------------------------------------------------------------------------------------------------------|----------------------------------|
|  |                       | <i>Stato a Messina ha trovato un abbassamento costante di m. 0,47 in tutto il piano del ferro dalla stazione dei ferry-boats al ponte sullo Zaera, e che la livellazione eseguita dall'Istituto Geografico Militare dimostra essa pure un abbassamento di m 0,37 in tutta la parte bassa della città”.</i>                                                                                                                                                                    | has found a constant lowering of m. 0.47 in the entire rail level from the ferry-boat station to the bridge over the Zaera, and that the leveling carried out by the Military Geographical Institute also demonstrates a drop of 0.37 m in the entire lower part of the city”.                                                                                                                                                 |                                  |
|  |                       | <i>“Presso il Lazzaretto la spiaggia appare abbassata in diversi punti di 5cm, e per tale abbassamento o per l’asportazione della sabbia causata dal maremoto, si è formata una piccola insenatura di circa 10 m di saetta..”. “Le banchine tutte intorno al porto si sono abbassate ed in parte franate. Anche in altri punti vi fu abbassamento della costa”</i>                                                                                                            | At the Lazzaretto the beach appears lowered in various points of 5cm, and for this lowering or for the removal of the sand caused by the tsunami, a small inlet of about 10m has formed; The docks all around the port have subsided and partly collapsed...”. “Also in other points there was a lowering of the coast”                                                                                                        | Platania, 1909;<br>Franchi, 1909 |
|  | Pietraperzia          | <i>“Fenditure apertasi nei pressi di Pietraperzia. A circa 2 km dall’abitato fu notata una grande frattura a forma di arco con orientazione NE-SW, della lunghezza di circa 150 m con profondità di parecchi punti di alcuni metri e larghezza di 1.5 m producendo dislivelli di terreno di circa 2 m nelle campagne circostanti... si produssero molte fenditure nel suolo. Fu notata una grande frattura a forma d’arco producendo dislivelli nel terreno di circa m 2”</i> | “Fissures opened near Pietraperzia. About 2 km from the town, a large arc-shaped fracture was noted with NE-SW orientation, about 150 m long with a depth of several meters and a width of 1.5 m, producing differences in ground level of about 2 m in the surrounding countryside... many fissures were made in the soil. A large arc-shaped fracture was noted, producing differences in height of about 2 m in the ground. | Baratta, 1910                    |
|  |                       | <i>“nelle campagne circostanti si produssero molte fenditure nel suolo. Fu notata una grande frattura a forma d’arco producendo dislivelli nel terreno di circa m 2.”</i>                                                                                                                                                                                                                                                                                                     | “Many fissures were produced in the surrounding countryside. A large arc-shaped fracture was noted producing differences in ground level of about 2 m.                                                                                                                                                                                                                                                                         |                                  |
|  | Raddusa               | <i>“Si aprì una fenditura della larghezza di mezzo metro, profonda da 2 a 4 metri e di circa 5 km di lunghezza, orientata in direzione NW-SE. Si aprì una fenditura nel terreno della lunghezza di mezzo metro profonda da 2 a 4 m”</i>                                                                                                                                                                                                                                       | “A fissure half a meter wide, 2 to 4 meters deep and about 5 km long opened, oriented in a NW-SE direction. A crack opened in the ground, half a meter long, 2 to 4 m deep"                                                                                                                                                                                                                                                    | Baratta, 1910                    |
|  | Torre Faro            | <i>“un lembo di spiaggia scivolò in mare per 10 12 metri”. “Nella strada Torre Faro-Granatari si aprì una lunga fenditura longitudinale con un abbassamento di circa 7cm. La strada verso il Pantano Piccolo si avvallò”; “fenditure con fuoriuscita di acqua e fango con odore di zolfo”</i>                                                                                                                                                                                 | “a strip of beach slipped 10 12 meters into the sea”. “A long longitudinal fissure opened up on the Torre Faro-Granatari road with a drop of about 7cm. The road to the Pantano Piccolo sank”; "cracks with the leakage of water and mud with a sulfur smell"                                                                                                                                                                  | Platania, 1909;<br>Baratta, 1910 |
|  | Fiumara della Guardia | <i>“Scoscendimenti nei sabbioni quaternari”</i>                                                                                                                                                                                                                                                                                                                                                                                                                               | “Landslides in the Quaternary sandbanks”                                                                                                                                                                                                                                                                                                                                                                                       | Baratta, 1910-I parte            |
|  | Fiumara Pace          | <i>“Danni alla Stazione fotoelettrica della R. Marina, scoscendimento nei sabbioni”</i>                                                                                                                                                                                                                                                                                                                                                                                       | "Damage to the photoelectric station of the R. Marina, landslides in the sand"                                                                                                                                                                                                                                                                                                                                                 | Baratta, 1910                    |
|  | S.Agata (Me)          | <i>“lungo la strada verso Faro Superiore si verificarono molti scoscendimenti superficiali; lungo la fiumara della Guardia furono osservati alcuni notevoli scivolamenti”</i>                                                                                                                                                                                                                                                                                                 | “many shallow landslides occurred along the road to Faro Superiore; some notable slips were observed along the Fiumara della Guardia”                                                                                                                                                                                                                                                                                          | Baratta, 1910                    |
|  | Archi                 | <i>“Lungo la strada che conduce a Gallico fu rilevato un notevole smottamento”</i>                                                                                                                                                                                                                                                                                                                                                                                            | “A considerable landslide was detected along the road leading to Gallico”                                                                                                                                                                                                                                                                                                                                                      | Baratta, 1910                    |
|  | Cataforio             | <i>“Nei pressi dell’abitato furono rilevate molte spaccature e smottamenti; in particolare, lungo la mulattiera verso San Salvatore al momento del terremoto si staccò una frana che travolse tre mulattieri con le loro cavalcature”</i>                                                                                                                                                                                                                                     | “Many fissures and landslides were found near the town; in particular, along the mule track towards San Salvatore at the time of the earthquake a landslide broke off that swept away three mule drivers with their mounts”                                                                                                                                                                                                    |                                  |

|                                                                                                                                                                                                                                                                                                                                                                                                                                                                                             |  |  |  |  |
|---------------------------------------------------------------------------------------------------------------------------------------------------------------------------------------------------------------------------------------------------------------------------------------------------------------------------------------------------------------------------------------------------------------------------------------------------------------------------------------------|--|--|--|--|
| Main historical sources                                                                                                                                                                                                                                                                                                                                                                                                                                                                     |  |  |  |  |
| Archivio Centrale dello Stato, Ministero dell’Interno, Serie diverse, Comitato centrale di soccorso dei danneggiati dal terremoto della Calabria e della Sicilia, b.1, Telegramma del prefetto di Caltanissetta al Ministero dell’Interno sul terremoto del 28 dicembre 1908, Caltanissetta 28 dicembre 1908.                                                                                                                                                                               |  |  |  |  |
| Archivio Centrale dello Stato, Ministero dell’Interno, Serie diverse, Comitato centrale di soccorso dei danneggiati dal terremoto della Calabria e della Sicilia, b.1, Telegramma del prefetto di Catania al Ministero dell’Interno sul terremoto del 28 dicembre 1908, Catania 28 dicembre 1908.                                                                                                                                                                                           |  |  |  |  |
| Archivio Centrale dello Stato, Ministero dell’Interno, Serie diverse, Comitato centrale di soccorso dei danneggiati dal terremoto della Calabria e della Sicilia, b.1, Telegramma del prefetto di Catanzaro al Ministero dell’Interno sul terremoto del 28 dicembre 1908, Catanzaro 28 dicembre 1908a.                                                                                                                                                                                      |  |  |  |  |
| Archivio Centrale dello Stato, Ministero dell’Interno, Serie diverse, Comitato centrale di soccorso dei danneggiati dal terremoto della Calabria e della Sicilia, b.1, Telegramma del prefetto di Catanzaro al Ministero dell’Interno sul terremoto del 28 dicembre 1908, Catanzaro 28 dicembre 1908b.                                                                                                                                                                                      |  |  |  |  |
| Archivio Centrale dello Stato, Ministero dell’Interno, Serie diverse, Comitato centrale di soccorso dei danneggiati dal terremoto della Calabria e della Sicilia, b.1, Telegramma del prefetto di Cosenza al Ministero dell’Interno sul terremoto del 28 dicembre 1908, Cosenza 28 dicembre 1908a.                                                                                                                                                                                          |  |  |  |  |
| Archivio Centrale dello Stato, Ministero dell’Interno, Serie diverse, Comitato centrale di soccorso dei danneggiati dal terremoto della Calabria e della Sicilia, b.1, Telegramma del prefetto di Cosenza al Ministero dell’Interno sul terremoto del 28 dicembre 1908, Cosenza 28 dicembre 1908b.                                                                                                                                                                                          |  |  |  |  |
| Archivio Centrale dello Stato, Ministero dell’Interno, Serie diverse, Comitato centrale di soccorso dei danneggiati dal terremoto della Calabria e della Sicilia, b.1, Telegramma del sindaco di Mongiana al Ministero dell’Interno sul terremoto del 28 dicembre 1908, Mongiana 28 dicembre 1908.                                                                                                                                                                                          |  |  |  |  |
| Archivio Centrale dello Stato, Ministero dell’Interno, Serie diverse, Comitato centrale di soccorso dei danneggiati dal terremoto della Calabria e della Sicilia, b.1, Telegramma del sottoprefetto di Castrolibero al Ministero dell’Interno sul terremoto del 28 dicembre 1908, Castrolibero 29 dicembre 1908. 1908                                                                                                                                                                       |  |  |  |  |
| Archivio Centrale dello Stato, Ministero dell’Interno, Serie diverse, Comitato centrale di soccorso dei danneggiati dal terremoto della Calabria e della Sicilia, b.1, Telegramma del prefetto di Catanzaro al Ministero dell’Interno sul terremoto del 28 dicembre 1908, Catanzaro 29 dicembre 1908.                                                                                                                                                                                       |  |  |  |  |
| Archivio Centrale dello Stato, Ministero dell’Interno, Serie diverse, Comitato centrale di soccorso dei danneggiati dal terremoto della Calabria e della Sicilia, b.1, Telegramma del sottotenente dei Carabinieri Carbone al Ministero dell’Interno sul terremoto del 28 dicembre 1908, Milazzo 29 dicembre 1908                                                                                                                                                                           |  |  |  |  |
| Archivio Centrale dello Stato, Ministero dell’Interno, Serie diverse, Comitato centrale di soccorso dei danneggiati dal terremoto della Calabria e della Sicilia, b.1, Telegramma del maresciallo dei Carabinieri Marzovilla al Ministero dell’Interno sul terremoto del 28 dicembre 1908, Serra San Bruno 29 dicembre 1908.                                                                                                                                                                |  |  |  |  |
| Archivio Centrale dello Stato, Ministero dell’Interno, Serie diverse, Comitato centrale di soccorso dei danneggiati dal terremoto della Calabria e della Sicilia, b.1, Telegramma del prefetto di Reggio Calabria al Ministero dell’Interno sul terremoto del 28 dicembre 1908, Reggio Calabria 30 dicembre 1908.                                                                                                                                                                           |  |  |  |  |
| Archivio Centrale dello Stato, Ministero dell’Interno, Serie diverse, Comitato centrale di soccorso dei danneggiati dal terremoto della Calabria e della Sicilia, b.1, Telegramma del sindaco di Motta San Giovanni al Ministero dell’Interno sul terremoto del 28 dicembre 1908, Motta San Giovanni dicembre 1908.                                                                                                                                                                         |  |  |  |  |
| Archivio Centrale dello Stato, Ministero dell’Interno, Serie diverse, Comitato centrale di soccorso dei danneggiati dal terremoto della Calabria e della Sicilia, b.10, Elenco dei Comuni danneggiati dal terremoto del 28 dicembre 1908, Catanzaro 5 gennaio 1909.                                                                                                                                                                                                                         |  |  |  |  |
| Archivio Centrale dello Stato, Ministero dell’Interno, Serie diverse, Comitato centrale di soccorso dei danneggiati dal terremoto della Calabria e della Sicilia, b.10, Danni alle persone ed alle proprietà causati dal terremoto del 28 dicembre 1908 nelle provincie di Messina, Reggio Calabria, Catanzaro, Catania, Agrigento, Caltanissetta e Cosenza, [Roma] 1909.                                                                                                                   |  |  |  |  |
| Archivio Centrale dello Stato, Ministero dell’Interno, Direzione generale dell’amministrazione civile, Terremoti, el.4, b.28, fasc.25000.5.5 (1909) -Relazione del commissario regio del circondario di Palmi e dei comuni di Bagnara, Scilla e Cannitello sul terremoto del 28 dicembre 1908, Roma 10 maggio 1909.                                                                                                                                                                         |  |  |  |  |
| Archivio di Stato di Reggio Calabria, Prefettura, serie I (Affari generali), inventario 24/I, Appendice, fascio 433, fasc.95, Corpo reale del Genio civile (1910) "Elenchi dei proprietari di case danneggiate dal terremoto del 1907 nei diversi comuni del circondario di Gerace, i cui lavori di riparazione secondo le perizie redatte dal Genio civile di Reggio Calabria non furono iniziati od ultimati a causa del terremoto del 28 dicembre 1908", Reggio Calabria 25 aprile 1910. |  |  |  |  |



|                                                                                                                                                                                                                                                                                                                  |
|------------------------------------------------------------------------------------------------------------------------------------------------------------------------------------------------------------------------------------------------------------------------------------------------------------------|
| Baratta M. (1909). Alcuni risultati ottenuti dallo studio del terremoto calabro-messinese del 28 dicembre 1908. Bollettino della Società Geografica Italiana, s.IV, vol.10 (a.43, vol.46), pp.1218-1224. Roma                                                                                                    |
| Baratta M. (1910). La catastrofe sismica calabro messinese (28 dicembre 1908). Relazione alla Società Geografica Italiana, 2 voll. Roma                                                                                                                                                                          |
| Barreca A. (1931). Episodio memorando di un superstite nel terremoto di Messina del 28 Dicembre 1908, Siracusa, pp. 4-17                                                                                                                                                                                         |
| Barrera A. (1909). Lettera in: L’alba del terrore a Messina e a Reggio il 28 Dicembre 1908., ed. Nerbini, Firenze, pp. 1-3.                                                                                                                                                                                      |
| Corriere della Sera, 1908.12.28. Milano                                                                                                                                                                                                                                                                          |
| Corriere di Catania, 1909.01.25, a. 31, n.25                                                                                                                                                                                                                                                                     |
| De Fiore O. (1921). Rotazioni e spostamenti nel terremoto calabro-siculo 1908. Bollettino delle sedute della Accademia Gioenia di Scienze Naturali in Catania", s.II, a.1920-21, fasc.49, 95-111.                                                                                                                |
| Franchi S. (1909). Il terremoto del 28 Dicembre 1908 a Messina, in rapporto alla natura del terreno ed alla riedificazione della città.                                                                                                                                                                          |
| Lo Giudice, P. (1909). I laghi di Ganzirri e del Faro (Messina) dopo il terremoto del 28 Dicembre 1908, Rivista mensile di Pesca e Idrobiologia, Anno XI, Luglio-Agosto, 7-8.                                                                                                                                    |
| L’Ora, 1908.12.29, a.9, n.361. Palermo                                                                                                                                                                                                                                                                           |
| L’Ora, 1908.12.30, a.9, n.362. Palermo                                                                                                                                                                                                                                                                           |
| L’Ora, 1909.01.01, a.10, n.1. Palermo                                                                                                                                                                                                                                                                            |
| L’Ora, 1909.01.02, a.10, n.2. Palermo                                                                                                                                                                                                                                                                            |
| L’Ora, 1909.01.03, a.10, n.3. Palermo                                                                                                                                                                                                                                                                            |
| L’Ora, 1909.01.06, a.10, n.6. Palermo                                                                                                                                                                                                                                                                            |
| L’Ora, 1909.01.08, a.10, n.8. Palermo                                                                                                                                                                                                                                                                            |
| Luiggi L. (1909). Quel che ho veduto all’alba del terremoto calabro-siculo del 1908. Nuova Antologia di Lettere Scienze ed Arti, serie V, 141 (Maggio-Giugno 1909), 297-317.                                                                                                                                     |
| Mercalli G. (1909). Contributo allo studio del terremoto calabro-messinese del 28 dicembre 1908. Atti del Regio Istituto di Incoraggiamento di Napoli, s.VI, 7, 249-292. Napoli                                                                                                                                  |
| Platania G. (1908-09). Il maremoto dello Stretto di Messina del 28 dicembre 1908. Bollettino della Società Sismologica Italiana,13, 369-458, Modena                                                                                                                                                              |
| Rizzo G.B. (1909). Relazione sul terremoto di Messina e della Calabria nel 28 dicembre 1908. In "Relazione della Commissione reale incaricata di designare le zone più adatte per la ricostruzione degli abitati colpiti dal terremoto del 28 dicembre 1908 o da altri precedenti", allegato E, pp.157-161, Roma |

| <div>Table S5</div> <div>MACROSEISMIC FIELD - 5 February 1783 (Mw 6.84) earthquake</div> |          |           |       |                    |                     |
|------------------------------------------------------------------------------------------|----------|-----------|-------|--------------------|---------------------|
| Location                                                                                 | Latitude | Longitude | I EMS | Epicenter latitude | Epicenter longitude |
| Polistena                                                                                | 38.406   | 16.076    | 10-11 | 38.323             | 15.972              |
| Acquaro (RC)                                                                             | 38.268   | 15.899    | 10-11 |                    |                     |
| Anoia (Inferiore)                                                                        | 38.435   | 16.08     | 10-11 |                    |                     |
| Anoia Superiore                                                                          | 38.432   | 16.097    | 10-11 |                    |                     |
| Bagnara Calabria                                                                         | 38.286   | 15.805    | 10-11 |                    |                     |
| Castellace                                                                               | 38.315   | 15.94     | 10-11 |                    |                     |
| Cinquefrondi                                                                             | 38.417   | 16.095    | 10-11 |                    |                     |
| Cittanova [Casalnuovo]                                                                   | 38.353   | 16.081    | 10-11 |                    |                     |
| Cosoleto Vecchio                                                                         | 38.284   | 15.925    | 10-11 |                    |                     |
| Delianuova (Pedavoli)                                                                    | 38.236   | 15.918    | 10-11 |                    |                     |
| Galatoni                                                                                 | 38.339   | 16.037    | 10-11 |                    |                     |
| Iatrinoli                                                                                | 38.353   | 16.007    | 10-11 |                    |                     |
| Lubrichi                                                                                 | 38.27    | 15.95     | 10-11 |                    |                     |
| Messignadi                                                                               | 38.297   | 15.997    | 10-11 |                    |                     |
| Molochiello                                                                              | 38.31    | 16.028    | 10-11 |                    |                     |
| Molochio                                                                                 | 38.308   | 16.032    | 10-11 |                    |                     |
| Oppido Mamertina                                                                         | 38.291   | 15.985    | 10-11 |                    |                     |
| Palmi                                                                                    | 38.358   | 15.849    | 10-11 |                    |                     |
| Paracorio                                                                                | 38.234   | 15.92     | 10-11 |                    |                     |
| Pedavoli                                                                                 | 38.241   | 15.92     | 10-11 |                    |                     |
| Radicena                                                                                 | 38.355   | 16.017    | 10-11 |                    |                     |
| Rizziconi                                                                                | 38.411   | 15.959    | 10-11 |                    |                     |
| San Martino (RC)                                                                         | 38.361   | 15.975    | 10-11 |                    |                     |
| San Procopio                                                                             | 38.281   | 15.891    | 10-11 |                    |                     |
| Santa Cristina d'Aspromonte                                                              | 38.255   | 15.97     | 10-11 |                    |                     |
| Santa Giorgia                                                                            | 38.253   | 15.936    | 10-11 |                    |                     |
| Scido                                                                                    | 38.245   | 15.933    | 10-11 |                    |                     |
| Scrofario                                                                                | 38.335   | 16.018    | 10-11 |                    |                     |
| Sinopoli Vecchio                                                                         | 38.281   | 15.908    | 10-11 |                    |                     |
| Sitizano                                                                                 | 38.281   | 15.939    | 10-11 |                    |                     |
| Tresilico                                                                                | 38.299   | 15.983    | 10-11 |                    |                     |
| Varapodio                                                                                | 38.315   | 15.984    | 10-11 |                    |                     |
| Zurgonadio                                                                               | 38.298   | 15.979    | 10-11 |                    |                     |
| Drosi                                                                                    | 38.426   | 15.956    | 10    |                    |                     |
| Giffone                                                                                  | 38.438   | 16.149    | 10    |                    |                     |
| Maropati                                                                                 | 38.441   | 16.097    | 10    |                    |                     |
| Melicucco                                                                                | 38.433   | 16.06     | 10    |                    |                     |
| Rosarno                                                                                  | 38.487   | 15.976    | 10    |                    |                     |
| San Fili                                                                                 | 38.456   | 16.034    | 10    |                    |                     |
| Sant'Anna di Seminara                                                                    | 38.322   | 15.887    | 10    |                    |                     |
| Sant'Eufemia d'Aspromonte                                                                | 38.263   | 15.857    | 10    |                    |                     |
| Seminara [Vecchia]                                                                       | 38.335   | 15.872    | 10    |                    |                     |
| Sinopoli (Superiore)                                                                     | 38.264   | 15.878    | 10    |                    |                     |
| Sinopoli Inferiore                                                                       | 38.261   | 15.886    | 10    |                    |                     |
| Terranova Sappo Minulio                                                                  | 38.321   | 16.007    | 10    |                    |                     |
| Tritanti                                                                                 | 38.448   | 16.101    | 10    |                    |                     |
| Ferruzzano                                                                               | 38.039   | 16.087    | 9-10  |                    |                     |
| Galatro                                                                                  | 38.46    | 16.109    | 9-10  |                    |                     |
| Gioia Tauro                                                                              | 38.426   | 15.899    | 9-10  |                    |                     |
| Plaesano                                                                                 | 38.473   | 16.077    | 9-10  |                    |                     |
| San Giorgio Morgeto                                                                      | 38.386   | 16.107    | 9-10  |                    |                     |
| Armo                                                                                     | 38.07    | 15.715    | 9     |                    |                     |
| Badia                                                                                    | 38.564   | 15.956    | 9     |                    |                     |
| Borrello                                                                                 | 38.513   | 16.069    | 9     |                    |                     |
| Calanna                                                                                  | 38.183   | 15.724    | 9     |                    |                     |
| Cardeto                                                                                  | 38.084   | 15.768    | 9     |                    |                     |
| Caroni (VV)                                                                              | 38.568   | 15.96     | 9     |                    |                     |
| Diminniti                                                                                | 38.173   | 15.696    | 9     |                    |                     |
| Dinami                                                                                   | 38.528   | 16.147    | 9     |                    |                     |
| Laganadi                                                                                 | 38.173   | 15.741    | 9     |                    |                     |
| Melicuccà                                                                                | 38.302   | 15.881    | 9     |                    |                     |

|                                      |        |        |     |  |  |
|--------------------------------------|--------|--------|-----|--|--|
| Stelletanone                         | 38.485 | 16.084 | 9   |  |  |
| Arasì                                | 38.139 | 15.737 | 8-9 |  |  |
| Arzona                               | 38.622 | 16.046 | 8-9 |  |  |
| Bellantone                           | 38.497 | 16.091 | 8-9 |  |  |
| Bruzzano Vecchio                     | 38.021 | 16.077 | 8-9 |  |  |
| Candidoni                            | 38.505 | 16.086 | 8-9 |  |  |
| Caridà (RC)                          | 38.524 | 16.135 | 8-9 |  |  |
| Caroniti                             | 38.594 | 15.905 | 8-9 |  |  |
| Cirella                              | 38.232 | 16.099 | 8-9 |  |  |
| Comerconi                            | 38.583 | 15.933 | 8-9 |  |  |
| Condoianni                           | 38.208 | 16.196 | 8-9 |  |  |
| Feroletto della Chiesa               | 38.465 | 16.064 | 8-9 |  |  |
| Fiumara (San Nicola)                 | 38.211 | 15.693 | 8-9 |  |  |
| Garavati                             | 38.593 | 16     | 8-9 |  |  |
| Garopoli                             | 38.526 | 16.145 | 8-9 |  |  |
| Laureana di Borrello                 | 38.491 | 16.083 | 8-9 |  |  |
| Mesiano                              | 38.624 | 16.011 | 8-9 |  |  |
| Moladi                               | 38.59  | 16.002 | 8-9 |  |  |
| Motta Filocastro                     | 38.571 | 15.975 | 8-9 |  |  |
| Nicotera                             | 38.551 | 15.938 | 8-9 |  |  |
| Orsigliadi (VV)                      | 38.6   | 16.003 | 8-9 |  |  |
| Paravati                             | 38.591 | 16.06  | 8-9 |  |  |
| Platì                                | 38.221 | 16.044 | 8-9 |  |  |
| Rombiolo                             | 38.596 | 16.005 | 8-9 |  |  |
| San Domenico                         | 38.203 | 15.676 | 8-9 |  |  |
| San Pietro (VV)                      | 38.573 | 16.037 | 8-9 |  |  |
| San Pietro di Caridà (san piefedele) | 38.523 | 16.135 | 8-9 |  |  |
| Sant'Agata (RC)                      | 38.091 | 15.721 | 8-9 |  |  |
| Sant'Alessio in Aspromonte           | 38.172 | 15.758 | 8-9 |  |  |
| Sant'Ilario dello Ionio              | 38.218 | 16.195 | 8-9 |  |  |
| Santo Stefano in Aspromonte          | 38.168 | 15.789 | 8-9 |  |  |
| Scaliti                              | 38.614 | 16.042 | 8-9 |  |  |
| Schindilifà                          | 38.164 | 15.76  | 8-9 |  |  |
| Serrata                              | 38.512 | 16.101 | 8-9 |  |  |
| Zungri                               | 38.654 | 15.984 | 8-9 |  |  |
| Acciarello                           | 38.212 | 15.638 | 8   |  |  |
| Africo [vecchio]                     | 38.065 | 15.98  | 8   |  |  |
| Antonimina                           | 38.272 | 16.15  | 8   |  |  |
| Bagaladi                             | 38.026 | 15.821 | 8   |  |  |
| Barbalaconi                          | 38.634 | 15.873 | 8   |  |  |
| Bianco [vecchio]                     | 38.095 | 16.118 | 8   |  |  |
| Bovalino Superiore (Benestare)       | 38.17  | 16.156 | 8   |  |  |
| Briatico Vecchio                     | 38.707 | 16.023 | 8   |  |  |
| Calimera                             | 38.556 | 16.018 | 8   |  |  |
| Campo Calabro                        | 38.213 | 15.659 | 8   |  |  |
| Cannavò                              | 38.099 | 15.69  | 8   |  |  |
| Cannitello                           | 38.234 | 15.657 | 8   |  |  |
| Careri                               | 38.177 | 16.115 | 8   |  |  |
| Caria                                | 38.646 | 15.905 | 8   |  |  |
| Casalnuovo di africo                 | 38.056 | 15.993 | 8   |  |  |
| Catona                               | 38.185 | 15.643 | 8   |  |  |
| Cerasi                               | 38.159 | 15.751 | 8   |  |  |
| Comparni                             | 38.568 | 16.056 | 8   |  |  |
| Croce Valanidi                       | 38.055 | 15.677 | 8   |  |  |
| Daffinà                              | 38.68  | 15.951 | 8   |  |  |
| Drapia                               | 38.664 | 15.911 | 8   |  |  |
| Engreste                             | 38.204 | 15.674 | 8   |  |  |
| Favelloni                            | 38.682 | 16.028 | 8   |  |  |
| Ferrito                              | 38.234 | 15.66  | 8   |  |  |
| Filandari                            | 38.615 | 16.031 | 8   |  |  |
| Fitili                               | 38.675 | 15.931 | 8   |  |  |
| Fontanelle                           | 38.175 | 15.643 | 8   |  |  |
| Francica                             | 38.616 | 16.099 | 8   |  |  |
| Gallico                              | 38.168 | 15.657 | 8   |  |  |
| Gasponi                              | 38.661 | 15.904 | 8   |  |  |
| Gerace                               | 38.271 | 16.22  | 8   |  |  |
| Grotteria                            | 38.364 | 16.265 | 8   |  |  |
| Jonadi                               | 38.627 | 16.055 | 8   |  |  |

|                                 |        |        |     |  |  |
|---------------------------------|--------|--------|-----|--|--|
| Joppolo                         | 38.585 | 15.896 | 8   |  |  |
| La Rocchetta                    | 38.726 | 16.042 | 8   |  |  |
| Lampazzone                      | 38.631 | 15.875 | 8   |  |  |
| Limbadi                         | 38.555 | 15.966 | 8   |  |  |
| Mammola (Mamolo?)               | 38.362 | 16.24  | 8   |  |  |
| Mandaradoni (VV)                | 38.574 | 15.965 | 8   |  |  |
| Mileto [vecchio]                | 38.593 | 16.08  | 8   |  |  |
| Mosorrofa                       | 38.098 | 15.724 | 8   |  |  |
| Motticella                      | 38.025 | 16.055 | 8   |  |  |
| Musalà                          | 38.214 | 15.671 | 8   |  |  |
| Mutari                          | 38.625 | 16.14  | 8   |  |  |
| Nao                             | 38.628 | 16.062 | 8   |  |  |
| Nasiti                          | 38.112 | 15.696 | 8   |  |  |
| Natile Vecchio                  | 38.188 | 16.051 | 8   |  |  |
| Orsigliadi                      | 38.629 | 15.861 | 8   |  |  |
| Ortì Superiore                  | 38.15  | 15.724 | 8   |  |  |
| Panaia                          | 38.623 | 15.892 | 8   |  |  |
| Papaglioni                      | 38.645 | 16.016 | 8   |  |  |
| Pavigliana                      | 38.104 | 15.714 | 8   |  |  |
| Perlupo                         | 38.132 | 15.723 | 8   |  |  |
| Pernocarello                    | 38.613 | 16.007 | 8   |  |  |
| Pernocari                       | 38.61  | 16.006 | 8   |  |  |
| Pezzo Inferiore                 | 38.231 | 15.638 | 8   |  |  |
| Piale                           | 38.224 | 15.648 | 8   |  |  |
| Pizzinni                        | 38.626 | 16.048 | 8   |  |  |
| Podargoni                       | 38.162 | 15.781 | 8   |  |  |
| Pongadi                         | 38.615 | 16.136 | 8   |  |  |
| Porticato                       | 38.234 | 15.649 | 8   |  |  |
| Preitoni                        | 38.576 | 15.922 | 8   |  |  |
| Presinaci                       | 38.607 | 16.018 | 8   |  |  |
| Reggio di Calabria              | 38.108 | 15.647 | 8   |  |  |
| Ricadi                          | 38.626 | 15.867 | 8   |  |  |
| Rosalì                          | 38.198 | 15.68  | 8   |  |  |
| Salice Calabro                  | 38.197 | 15.659 | 8   |  |  |
| Sambatello                      | 38.178 | 15.692 | 8   |  |  |
| San Calogero                    | 38.573 | 16.024 | 8   |  |  |
| San Cono                        | 38.683 | 16.013 | 8   |  |  |
| San Costantino                  | 38.705 | 16.002 | 8   |  |  |
| San Costantino Calabro          | 38.631 | 16.073 | 8   |  |  |
| San Giovanni(VV)                | 38.584 | 16.084 | 8   |  |  |
| San Giovanni di Sambatello (RC) | 38.169 | 15.689 | 8   |  |  |
| San Leo Vecchio                 | 38.711 | 16.02  | 8   |  |  |
| San Marco                       | 38.675 | 16.01  | 8   |  |  |
| San Nicola de' Legistis         | 38.561 | 15.992 | 8   |  |  |
| San Roberto                     | 38.211 | 15.736 | 8   |  |  |
| Santa Domenica                  | 38.663 | 15.866 | 8   |  |  |
| Sciconi                         | 38.691 | 16.031 | 8   |  |  |
| Scilla                          | 38.253 | 15.717 | 8   |  |  |
| Stefanaconi                     | 38.673 | 16.122 | 8   |  |  |
| Straorino                       | 38.132 | 15.747 | 8   |  |  |
| Terreti                         | 38.119 | 15.711 | 8   |  |  |
| Trizzino                        | 38.122 | 15.709 | 8   |  |  |
| Tropea                          | 38.675 | 15.899 | 8   |  |  |
| Villa San Giuseppe              | 38.187 | 15.671 | 8   |  |  |
| Alafito                         | 38.672 | 15.919 | 7-8 |  |  |
| Amendolea [vecchia]             | 37.988 | 15.892 | 7-8 |  |  |
| Ardore                          | 38.191 | 16.168 | 7-8 |  |  |
| Bova                            | 37.994 | 15.932 | 7-8 |  |  |
| Bovetto                         | 38.06  | 15.674 | 7-8 |  |  |
| Brancaleone Superiore           | 37.981 | 16.081 | 7-8 |  |  |
| Brattirò                        | 38.642 | 15.887 | 7-8 |  |  |
| Brivadi                         | 38.636 | 15.856 | 7-8 |  |  |
| Canolo                          | 38.314 | 16.2   | 7-8 |  |  |
| Caraffa del Bianco              | 38.092 | 16.087 | 7-8 |  |  |
| Carciadi (VV)                   | 38.628 | 15.908 | 7-8 |  |  |
| Case Pimé                       | 38.726 | 16.213 | 7-8 |  |  |
| Casignana                       | 38.101 | 16.089 | 7-8 |  |  |
| Ciaramiti                       | 38.65  | 15.862 | 7-8 |  |  |



|                                         |        |        |     |  |  |
|-----------------------------------------|--------|--------|-----|--|--|
| Ciminà                                  | 38.245 | 16.141 | 7-8 |  |  |
| Coccorino                               | 38.604 | 15.872 | 7-8 |  |  |
| Condofuri                               | 38.005 | 15.858 | 7-8 |  |  |
| Conidoni                                | 38.698 | 16.035 | 7-8 |  |  |
| Daffinacello                            | 38.677 | 15.944 | 7-8 |  |  |
| Filogaso                                | 38.681 | 16.228 | 7-8 |  |  |
| Gallicianò                              | 38.016 | 15.886 | 7-8 |  |  |
| Mandaradoni (VV)                        | 38.683 | 15.985 | 7-8 |  |  |
| Messina                                 | 38.185 | 15.555 | 7-8 |  |  |
| Monterosso Calabro                      | 38.717 | 16.289 | 7-8 |  |  |
| Motta San Giovanni                      | 38.002 | 15.694 | 7-8 |  |  |
| Palizzi                                 | 37.966 | 15.986 | 7-8 |  |  |
| Pannaconi                               | 38.692 | 16.041 | 7-8 |  |  |
| Paradisoni                              | 38.701 | 16.045 | 7-8 |  |  |
| Parghelia                               | 38.681 | 15.923 | 7-8 |  |  |
| Pietrapennata                           | 37.984 | 16.008 | 7-8 |  |  |
| Piscopio                                | 38.661 | 16.113 | 7-8 |  |  |
| Portigliola                             | 38.228 | 16.202 | 7-8 |  |  |
| Roghudi [vecchio]                       | 38.049 | 15.916 | 7-8 |  |  |
| Rometta                                 | 38.172 | 15.414 | 7-8 |  |  |
| San Giovanni                            | 38.675 | 15.973 | 7-8 |  |  |
| San Gregorio d'Ippona                   | 38.643 | 16.105 | 7-8 |  |  |
| San Lorenzo                             | 38.01  | 15.834 | 7-8 |  |  |
| San Luca (RC)                           | 38.146 | 16.064 | 7-8 |  |  |
| San Luca (RC)                           | 38.009 | 15.75  | 7-8 |  |  |
| San Nicolò                              | 38.633 | 15.851 | 7-8 |  |  |
| San Pietro di Bivona                    | 38.703 | 16.111 | 7-8 |  |  |
| Sant'Agata del Bianco                   | 38.091 | 16.083 | 7-8 |  |  |
| Siderno Superiore                       | 38.289 | 16.269 | 7-8 |  |  |
| Spilinga                                | 38.627 | 15.905 | 7-8 |  |  |
| Torre Faro                              | 38.266 | 15.646 | 7-8 |  |  |
| Triparni                                | 38.681 | 16.067 | 7-8 |  |  |
| Vena Media                              | 38.669 | 16.057 | 7-8 |  |  |
| Vena Superiore                          | 38.66  | 16.057 | 7-8 |  |  |
| Zaccanopoli                             | 38.664 | 15.929 | 7-8 |  |  |
| Zambrone                                | 38.699 | 15.991 | 7-8 |  |  |
| Zammarò                                 | 38.651 | 16.107 | 7-8 |  |  |
| Agnana Calabra                          | 38.302 | 16.224 | 7   |  |  |
| Barcellona Pozzo di Gotto               | 38.146 | 15.215 | 7   |  |  |
| Brognaturo                              | 38.602 | 16.342 | 7   |  |  |
| Calabrò                                 | 38.613 | 16.076 | 7   |  |  |
| Castroreale                             | 38.099 | 15.211 | 7   |  |  |
| Cessaniti                               | 38.663 | 16.026 | 7   |  |  |
| Fossato Ionico                          | 38.013 | 15.766 | 7   |  |  |
| Gioiosa Ionica                          | 38.332 | 16.302 | 7   |  |  |
| Grimaldi                                | 39.142 | 16.235 | 7   |  |  |
| Mantineo                                | 38.683 | 16.057 | 7   |  |  |
| Martone                                 | 38.354 | 16.288 | 7   |  |  |
| Mezzocasale                             | 38.646 | 16.106 | 7   |  |  |
| Monforte San Giorgio                    | 38.155 | 15.382 | 7   |  |  |
| Montebello Ionico                       | 37.982 | 15.758 | 7   |  |  |
| Panaia (VV)                             | 38.68  | 16.234 | 7   |  |  |
| Patti                                   | 38.138 | 14.966 | 7   |  |  |
| Pellaro                                 | 38.025 | 15.656 | 7   |  |  |
| Pentedattilo                            | 37.953 | 15.762 | 7   |  |  |
| Pentimele                               | 38.139 | 15.659 | 7   |  |  |
| Pimene                                  | 38.727 | 16.213 | 7   |  |  |
| Pizzo                                   | 38.733 | 16.159 | 7   |  |  |
| Potenzoni                               | 38.689 | 16.003 | 7   |  |  |
| Pozzo di Gotto                          | 38.152 | 15.232 | 7   |  |  |
| Precacore (Samo)                        | 38.071 | 16.053 | 7   |  |  |
| Roccaforte del Greco                    | 38.045 | 15.9   | 7   |  |  |
| Roccavaldina                            | 38.182 | 15.373 | 7   |  |  |
| Samo [Precacore]                        | 38.073 | 16.058 | 7   |  |  |
| San Giovanni di Gerace                  | 38.364 | 16.279 | 7   |  |  |
| San Martino                             | 38.207 | 15.39  | 7   |  |  |
| San Nicola (Ardore)                     | 38.202 | 16.145 | 7   |  |  |
| San Pier Niceto [San Piero di Monforte] | 38.158 | 15.352 | 7   |  |  |

|                             |        |        |     |  |  |
|-----------------------------|--------|--------|-----|--|--|
| Santa Lucia del Mela        | 38.14  | 15.281 | 7   |  |  |
| Sant'Onofrio                | 38.695 | 16.144 | 7   |  |  |
| Serra San Bruno             | 38.576 | 16.33  | 7   |  |  |
| Simbario                    | 38.611 | 16.335 | 7   |  |  |
| Sorianello                  | 38.592 | 16.233 | 7   |  |  |
| Soriano Calabro             | 38.598 | 16.23  | 7   |  |  |
| Spadola                     | 38.603 | 16.337 | 7   |  |  |
| Staiti                      | 37.999 | 16.034 | 7   |  |  |
| Stilo                       | 38.477 | 16.468 | 7   |  |  |
| Stromboli (San Vincenzo)    | 38.806 | 15.235 | 7   |  |  |
| Valdina                     | 38.193 | 15.371 | 7   |  |  |
| Vallelonga                  | 38.646 | 16.294 | 7   |  |  |
| Venetico                    | 38.193 | 15.381 | 7   |  |  |
| Vibo Valentia [Monteleone]  | 38.673 | 16.103 | 7   |  |  |
| Vinco                       | 38.108 | 15.723 | 7   |  |  |
| Acconia                     | 38.837 | 16.267 | 6-7 |  |  |
| Bivona                      | 38.709 | 16.103 | 6-7 |  |  |
| Bivongi                     | 38.482 | 16.453 | 6-7 |  |  |
| Bombile (Ardore)            | 38.205 | 16.173 | 6-7 |  |  |
| Camini                      | 38.432 | 16.483 | 6-7 |  |  |
| Canale                      | 38.176 | 16.128 | 6-7 |  |  |
| Cardinale                   | 38.642 | 16.387 | 6-7 |  |  |
| Castelmonardo               | 38.77  | 16.303 | 6-7 |  |  |
| Castelvetere (RC)(Caulonia) | 38.381 | 16.409 | 6-7 |  |  |
| Castiglione Cosentino       | 39.351 | 16.288 | 6-7 |  |  |
| Castiglione Marittimo       | 38.981 | 16.159 | 6-7 |  |  |
| Castrovillari               | 39.814 | 16.202 | 6-7 |  |  |
| Caulonia [Castelvetere]     | 38.381 | 16.409 | 6-7 |  |  |
| Chiaravalle Centrale        | 38.68  | 16.412 | 6-7 |  |  |
| Curinga                     | 38.826 | 16.313 | 6-7 |  |  |
| Fabrizia                    | 38.486 | 16.299 | 6-7 |  |  |
| Francavilla Angitola        | 38.777 | 16.271 | 6-7 |  |  |
| Giampileri Superiore        | 38.069 | 15.47  | 6-7 |  |  |
| Girifalco                   | 38.822 | 16.425 | 6-7 |  |  |
| Jacurso                     | 38.846 | 16.38  | 6-7 |  |  |
| Lipari                      | 38.467 | 14.955 | 6-7 |  |  |
| Maida                       | 38.858 | 16.365 | 6-7 |  |  |
| Maierato                    | 38.706 | 16.191 | 6-7 |  |  |
| Melito di Porto Salvo       | 37.92  | 15.784 | 6-7 |  |  |
| Milazzo                     | 38.224 | 15.24  | 6-7 |  |  |
| Nicastrello                 | 38.681 | 16.289 | 6-7 |  |  |
| Placanica                   | 38.414 | 16.451 | 6-7 |  |  |
| Riace                       | 38.418 | 16.482 | 6-7 |  |  |
| San Pietro a Maida          | 38.846 | 16.345 | 6-7 |  |  |
| Santa Caterina dello Ionio  | 38.534 | 16.521 | 6-7 |  |  |
| Satriano                    | 38.667 | 16.482 | 6-7 |  |  |
| Tindari                     | 38.141 | 15.045 | 6-7 |  |  |
| Torre di Ruggiero           | 38.651 | 16.372 | 6-7 |  |  |
| Trenta                      | 39.283 | 16.321 | 6-7 |  |  |
| Vena di Maida               | 38.888 | 16.407 | 6-7 |  |  |
| Altolia                     | 38.075 | 15.446 | 6   |  |  |
| Augusta                     | 37.231 | 15.221 | 6   |  |  |
| Calvaruso                   | 38.222 | 15.453 | 6   |  |  |
| Castrolibero [Castelfranco] | 39.307 | 16.194 | 6   |  |  |
| Condrò                      | 38.173 | 15.328 | 6   |  |  |
| Cortale                     | 38.838 | 16.412 | 6   |  |  |
| Crotone [Cotrone]           | 39.081 | 17.128 | 6   |  |  |
| Davoli                      | 38.649 | 16.485 | 6   |  |  |
| Gagliato                    | 38.676 | 16.462 | 6   |  |  |
| Gasperina                   | 38.739 | 16.508 | 6   |  |  |
| Gizzeria                    | 38.981 | 16.206 | 6   |  |  |
| Guardavalle                 | 38.505 | 16.505 | 6   |  |  |
| Linguaglossa                | 37.842 | 15.139 | 6   |  |  |
| Mili San Pietro             | 38.126 | 15.488 | 6   |  |  |
| Monasterace                 | 38.453 | 16.551 | 6   |  |  |
| Montauro                    | 38.747 | 16.512 | 6   |  |  |
| Paola                       | 39.36  | 16.041 | 6   |  |  |
| Pazzano                     | 38.475 | 16.452 | 6   |  |  |

|                                 |        |        |     |  |  |
|---------------------------------|--------|--------|-----|--|--|
| Randazzo                        | 37.877 | 14.948 | 6   |  |  |
| Roccella Jonica [Roccella]      | 38.324 | 16.405 | 6   |  |  |
| San Filippo Superiore           | 38.166 | 15.5   | 6   |  |  |
| San Lucido                      | 39.307 | 16.049 | 6   |  |  |
| San Nicola da Crissa            | 38.663 | 16.285 | 6   |  |  |
| San Sostene                     | 38.636 | 16.487 | 6   |  |  |
| Scaletta Superiore              | 38.051 | 15.466 | 6   |  |  |
| Squillace                       | 38.781 | 16.519 | 6   |  |  |
| Stignano                        | 38.417 | 16.471 | 6   |  |  |
| Arietta                         | 39.052 | 16.789 | 5   |  |  |
| Belcastro                       | 39.017 | 16.785 | 5   |  |  |
| Catania                         | 37.502 | 15.087 | 5   |  |  |
| Catanzaro                       | 38.905 | 16.594 | 5   |  |  |
| Cropani                         | 38.967 | 16.782 | 5   |  |  |
| Gagliano                        | 38.92  | 16.562 | 5   |  |  |
| Magisano                        | 39.013 | 16.628 | 5   |  |  |
| Marcedusa                       | 39.027 | 16.836 | 5   |  |  |
| Albi                            | 39.024 | 16.597 | 4-5 |  |  |
| Feroleto Antico                 | 38.962 | 16.388 | 4-5 |  |  |
| Fuscaldo                        | 39.415 | 16.03  | 4-5 |  |  |
| Mesoraca                        | 39.077 | 16.789 | 4-5 |  |  |
| Mineo                           | 37.266 | 14.691 | 4-5 |  |  |
| Modica                          | 36.858 | 14.761 | 4-5 |  |  |
| Petilia Policastro [Policastro] | 39.112 | 16.789 | 4-5 |  |  |
| Pianopoli [Feroleto Piano]      | 38.954 | 16.389 | 4-5 |  |  |
| Santa Sofia d'Epiro             | 39.546 | 16.329 | 4-5 |  |  |
| Scalea                          | 39.814 | 15.792 | 4-5 |  |  |
| Sellia                          | 38.981 | 16.629 | 4-5 |  |  |
| Sersale                         | 39.011 | 16.728 | 4-5 |  |  |
| Simeri                          | 38.932 | 16.662 | 4-5 |  |  |
| Soveria Simeri                  | 38.946 | 16.679 | 4-5 |  |  |
| Taverna                         | 39.02  | 16.582 | 4-5 |  |  |
| Zagarise                        | 38.999 | 16.663 | 4-5 |  |  |
| Siracusa                        | 37.073 | 15.286 | 4   |  |  |

| Table S6                                                  |          |           |       |                    |                     |
|-----------------------------------------------------------|----------|-----------|-------|--------------------|---------------------|
| MACROSEISMIC FIELD - 6 February 1783 (Mw 6.22) earthquake |          |           |       |                    |                     |
| Location                                                  | Latitude | Longitude | I EMS | Epicenter latitude | Epicenter longitude |
| Fiumara (San Nicola)                                      | 38.211   | 15.693    | 9     | 38.166             | 15.7077             |
| Mosorrofa                                                 | 38.098   | 15.724    | 9     |                    |                     |
| Nasiti                                                    | 38.112   | 15.696    | 9     |                    |                     |
| Orti Superiore                                            | 38.150   | 15.724    | 9     |                    |                     |
| Sambatello                                                | 38.178   | 15.692    | 9     |                    |                     |
| San Domenico                                              | 38.203   | 15.676    | 9     |                    |                     |
| San Giovanni di Sambatello (RC)                           | 38.169   | 15.689    | 9     |                    |                     |
| Schindilifà                                               | 38.164   | 15.760    | 9     |                    |                     |
| Straorino                                                 | 38.132   | 15.747    | 9     |                    |                     |
| Scilla                                                    | 38.253   | 15.717    | 9     |                    |                     |
| Cannitello                                                | 38.234   | 15.657    | 8-9   |                    |                     |
| Engreste                                                  | 38.204   | 15.674    | 8-9   |                    |                     |
| Rosalì                                                    | 38.198   | 15.680    | 8-9   |                    |                     |
| Sant'Agata (RC)                                           | 38.091   | 15.721    | 8-9   |                    |                     |
| Sant'Alessio in Aspromonte                                | 38.172   | 15.758    | 8-9   |                    |                     |
| Santo Stefano in Aspromonte                               | 38.168   | 15.789    | 8-9   |                    |                     |
| Villa San Giuseppe                                        | 38.187   | 15.671    | 8-9   |                    |                     |
| Arasì                                                     | 38.139   | 15.737    | 8-9   |                    |                     |
| Messina                                                   | 38.185   | 15.555    | 8-9   |                    |                     |
| Pavigliana                                                | 38.104   | 15.714    | 8-9   |                    |                     |
| Perlupo                                                   | 38.132   | 15.723    | 8-9   |                    |                     |
| Reggio di Calabria                                        | 38.108   | 15.647    | 8-9   |                    |                     |
| Terreti                                                   | 38.119   | 15.711    | 8-9   |                    |                     |
| Ardore                                                    | 38.191   | 16.168    | 8     |                    |                     |
| Bovetto                                                   | 38.060   | 15.674    | 8     |                    |                     |
| Campo Calabro                                             | 38.213   | 15.659    | 8     |                    |                     |
| Cannavò                                                   | 38.099   | 15.690    | 8     |                    |                     |
| Catona                                                    | 38.185   | 15.643    | 8     |                    |                     |
| Cerasi                                                    | 38.159   | 15.751    | 8     |                    |                     |
| Croce Valanidi                                            | 38.055   | 15.677    | 8     |                    |                     |
| Ferrito                                                   | 38.234   | 15.660    | 8     |                    |                     |
| Fontanelle                                                | 38.175   | 15.643    | 8     |                    |                     |
| Gallico                                                   | 38.168   | 15.657    | 8     |                    |                     |
| Motta San Giovanni                                        | 38.002   | 15.694    | 8     |                    |                     |
| Musalà                                                    | 38.214   | 15.671    | 8     |                    |                     |
| Palizzi                                                   | 37.966   | 15.986    | 8     |                    |                     |
| Pezzo Inferiore                                           | 38.231   | 15.638    | 8     |                    |                     |
| Piale                                                     | 38.224   | 15.648    | 8     |                    |                     |
| Porticato                                                 | 38.234   | 15.649    | 8     |                    |                     |
| Roccavaldina                                              | 38.182   | 15.373    | 8     |                    |                     |
| Rometta                                                   | 38.172   | 15.414    | 8     |                    |                     |
| Salice Calabro                                            | 38.197   | 15.659    | 8     |                    |                     |
| San Roberto                                               | 38.211   | 15.736    | 8     |                    |                     |
| Acciarello                                                | 38.212   | 15.638    | 8     |                    |                     |
| Africo [vecchio]                                          | 38.065   | 15.980    | 8     |                    |                     |
| Podargoni                                                 | 38.162   | 15.781    | 8     |                    |                     |
| Torre Faro                                                | 38.266   | 15.646    | 8     |                    |                     |
| Trizzino                                                  | 38.122   | 15.709    | 8     |                    |                     |
| Amendolea [vecchia]                                       | 37.988   | 15.892    | 7-8   |                    |                     |
| Bagaladi                                                  | 38.026   | 15.821    | 7-8   |                    |                     |
| Barcellona Pozzo di Gotto                                 | 38.146   | 15.215    | 7-8   |                    |                     |
| Bova                                                      | 37.994   | 15.932    | 7-8   |                    |                     |
| Castroreale                                               | 38.099   | 15.211    | 7-8   |                    |                     |
| Longobardi (CS)                                           | 39.206   | 16.076    | 7-8   |                    |                     |
| Pentimele                                                 | 38.139   | 15.659    | 7-8   |                    |                     |
| Pozzo di Gotto                                            | 38.152   | 15.232    | 7-8   |                    |                     |
| Condofuri                                                 | 38.005   | 15.858    | 7-8   |                    |                     |
| Gallicianò                                                | 38.016   | 15.886    | 7-8   |                    |                     |
| Pellaro                                                   | 38.025   | 15.656    | 7-8   |                    |                     |
| Pentedattilo                                              | 37.953   | 15.762    | 7-8   |                    |                     |
| Roccaforte del Greco                                      | 38.045   | 15.900    | 7-8   |                    |                     |
| Roghudi [vecchio]                                         | 38.049   | 15.916    | 7-8   |                    |                     |
| San Lorenzo                                               | 38.010   | 15.834    | 7-8   |                    |                     |
| San Luca (RC)                                             | 38.146   | 16.064    | 7-8   |                    |                     |



|                            |        |        |     |  |  |
|----------------------------|--------|--------|-----|--|--|
| San Luca (RC)              | 38.009 | 15.750 | 7-8 |  |  |
| Terranova Sappo Minulio    | 38.321 | 16.007 | 7-8 |  |  |
| Bombile (Ardore)           | 38.205 | 16.173 | 7   |  |  |
| Milazzo                    | 38.224 | 15.240 | 7   |  |  |
| Monforte San Giorgio       | 38.155 | 15.382 | 7   |  |  |
| Montebello Ionico          | 37.982 | 15.758 | 7   |  |  |
| Precacore (Samo)           | 38.071 | 16.053 | 7   |  |  |
| San Nicola (Ardore)        | 38.202 | 16.145 | 7   |  |  |
| Santa Lucia del Mela       | 38.140 | 15.281 | 7   |  |  |
| Scaletta Superiore         | 38.051 | 15.466 | 7   |  |  |
| Valdina                    | 38.193 | 15.371 | 7   |  |  |
| Venetico (Me)              | 38.193 | 15.381 | 7   |  |  |
| Fossato Ionico             | 38.013 | 15.766 | 7   |  |  |
| Vibo Valentia [Monteleone] | 38.673 | 16.103 | 7   |  |  |
| Melito di Porto Salvo      | 37.920 | 15.784 | 6-7 |  |  |
| Catanzaro                  | 38.905 | 16.594 | 5   |  |  |
| Santa Sofia d'Epiro        | 39.546 | 16.329 | 5   |  |  |
|                            |        |        |     |  |  |

| Table S7                                                  |          |           |       |                    |                     |
|-----------------------------------------------------------|----------|-----------|-------|--------------------|---------------------|
| MACROSEISMIC FIELD - 7 February 1783 (Mw 6.67) earthquake |          |           |       |                    |                     |
| Location                                                  | Latitude | Longitude | I EMS | Epicenter latitude | Epicenter longitude |
| Sorianello                                                | 38.592   | 16.233    | 10-11 | 38.581             | 16.202              |
| Soriano Calabro                                           | 38.598   | 16.230    | 10-11 |                    |                     |
| Acquaro (VV)                                              | 38.556   | 16.189    | 10    |                    |                     |
| Arena                                                     | 38.562   | 16.209    | 10    |                    |                     |
| Bracciara                                                 | 38.565   | 16.168    | 10    |                    |                     |
| Ciano                                                     | 38.576   | 16.213    | 10    |                    |                     |
| Daffinà (VV)                                              | 38.559   | 16.105    | 10    |                    |                     |
| Dasà                                                      | 38.564   | 16.196    | 10    |                    |                     |
| Gerocarne                                                 | 38.587   | 16.219    | 10    |                    |                     |
| Limpidi                                                   | 38.541   | 16.174    | 10    |                    |                     |
| Miglianò                                                  | 38.591   | 16.17     | 10    |                    |                     |
| Pizzoni                                                   | 38.623   | 16.252    | 10    |                    |                     |
| Potami                                                    | 38.579   | 16.207    | 10    |                    |                     |
| Pronia                                                    | 38.578   | 16.189    | 10    |                    |                     |
| San Basilio                                               | 38.623   | 16.250    | 10    |                    |                     |
| Santa Barbara                                             | 38.639   | 16.209    | 10    |                    |                     |
| Sant'Angelo                                               | 38.611   | 16.169    | 10    |                    |                     |
| Simiatoni                                                 | 38.558   | 16.179    | 10    |                    |                     |
| Vazzano                                                   | 38.632   | 16.247    | 10    |                    |                     |
| Borrello                                                  | 38.513   | 16.069    | 9-10  |                    |                     |
| Garavati                                                  | 38.593   | 16.000    | 9-10  |                    |                     |
| Garopoli                                                  | 38.526   | 16.145    | 9-10  |                    |                     |
| Laureana di Borrello                                      | 38.491   | 16.083    | 9-10  |                    |                     |
| Rombiolo                                                  | 38.596   | 16.005    | 9-10  |                    |                     |
| San Pietro (VV)                                           | 38.573   | 16.037    | 9-10  |                    |                     |
| Scaliti                                                   | 38.614   | 16.042    | 9-10  |                    |                     |
| Arzona                                                    | 38.622   | 16.046    | 9     |                    |                     |
| Bellantone                                                | 38.497   | 16.091    | 9     |                    |                     |
| Calabrò                                                   | 38.613   | 16.076    | 9     |                    |                     |
| Caridà (RC)                                               | 38.524   | 16.135    | 9     |                    |                     |
| Comparni                                                  | 38.568   | 16.056    | 9     |                    |                     |
| Filandari                                                 | 38.615   | 16.031    | 9     |                    |                     |
| Francica                                                  | 38.616   | 16.099    | 9     |                    |                     |
| Laganadi                                                  | 38.173   | 15.741    | 9     |                    |                     |
| Limbadi                                                   | 38.555   | 15.966    | 9     |                    |                     |
| Mandaradoni (VV)                                          | 38.574   | 15.965    | 9     |                    |                     |
| Mesiano                                                   | 38.624   | 16.011    | 9     |                    |                     |
| Mileto [vecchio]                                          | 38.593   | 16.080    | 9     |                    |                     |
| Motta Filocastro                                          | 38.571   | 15.975    | 9     |                    |                     |
| Mutari                                                    | 38.625   | 16.140    | 9     |                    |                     |
| Nicotera                                                  | 38.551   | 15.938    | 9     |                    |                     |
| Orsigliadi (VV)                                           | 38.600   | 16.003    | 9     |                    |                     |
| Orsigliadi                                                | 38.629   | 15.861    | 9     |                    |                     |
| Panaia                                                    | 38.623   | 15.892    | 9     |                    |                     |
| Paravati                                                  | 38.591   | 16.060    | 9     |                    |                     |
| Pizzinni                                                  | 38.626   | 16.048    | 9     |                    |                     |
| Pongadi                                                   | 38.615   | 16.136    | 9     |                    |                     |
| Presinaci                                                 | 38.607   | 16.018    | 9     |                    |                     |
| San Calogero                                              | 38.573   | 16.024    | 9     |                    |                     |
| San Costantino Calabro                                    | 38.631   | 16.073    | 9     |                    |                     |
| San Giovanni(VV)                                          | 38.584   | 16.084    | 9     |                    |                     |
| San Nicola de' Legistis                                   | 38.561   | 15.992    | 9     |                    |                     |
| San Pietro di Caridà (san piefedele)                      | 38.523   | 16.135    | 9     |                    |                     |
| Serrata                                                   | 38.512   | 16.101    | 9     |                    |                     |
| Stefanaconi                                               | 38.673   | 16.122    | 9     |                    |                     |
| Stelletanone                                              | 38.485   | 16.084    | 9     |                    |                     |
| Gallico                                                   | 38.168   | 15.657    | 9     |                    |                     |
| Candidoni                                                 | 38.505   | 16.086    | 8-9   |                    |                     |
| Coccorino                                                 | 38.604   | 15.872    | 8-9   |                    |                     |
| Comerconi                                                 | 38.583   | 15.933    | 8-9   |                    |                     |
| Feroletto della Chiesa                                    | 38.465   | 16.064    | 8-9   |                    |                     |
| Grotteria                                                 | 38.364   | 16.265    | 8-9   |                    |                     |

|                                    |        |        |     |  |  |
|------------------------------------|--------|--------|-----|--|--|
| Jonadi                             | 38.627 | 16.055 | 8-9 |  |  |
| Joppolo                            | 38.585 | 15.896 | 8-9 |  |  |
| La Rocchetta                       | 38.726 | 16.042 | 8-9 |  |  |
| Lampazzone                         | 38.631 | 15.875 | 8-9 |  |  |
| Moladi                             | 38.590 | 16.002 | 8-9 |  |  |
| Nao                                | 38.628 | 16.062 | 8-9 |  |  |
| Panaia (VV)                        | 38.680 | 16.234 | 8-9 |  |  |
| Papaglioni                         | 38.645 | 16.016 | 8-9 |  |  |
| Pernocarello                       | 38.613 | 16.007 | 8-9 |  |  |
| Pernocari                          | 38.610 | 16.006 | 8-9 |  |  |
| Preitoni                           | 38.576 | 15.922 | 8-9 |  |  |
| Zungri                             | 38.654 | 15.984 | 8-9 |  |  |
| Africo [vecchio]                   | 38.065 | 15.980 | 8   |  |  |
| Barbalaconi                        | 38.634 | 15.873 | 8   |  |  |
| Bianco [vecchio]                   | 38.095 | 16.118 | 8   |  |  |
| Briatico Vecchio                   | 38.707 | 16.023 | 8   |  |  |
| Brognaturo                         | 38.602 | 16.342 | 8   |  |  |
| Calimera                           | 38.556 | 16.018 | 8   |  |  |
| Capistrano                         | 38.692 | 16.289 | 8   |  |  |
| Certosa di Santo Stefano del Bosco | 38.564 | 16.319 | 8   |  |  |
| Chiaravalle Centrale               | 38.680 | 16.412 | 8   |  |  |
| Conidoni                           | 38.698 | 16.035 | 8   |  |  |
| Favelloni                          | 38.682 | 16.028 | 8   |  |  |
| Filogaso                           | 38.681 | 16.228 | 8   |  |  |
| Gerace                             | 38.271 | 16.220 | 8   |  |  |
| Girifalco                          | 38.822 | 16.425 | 8   |  |  |
| Mammola (Mamolo?)                  | 38.362 | 16.240 | 8   |  |  |
| Mantineo                           | 38.683 | 16.057 | 8   |  |  |
| Mezzocasale                        | 38.646 | 16.106 | 8   |  |  |
| Monterosso Calabro                 | 38.717 | 16.289 | 8   |  |  |
| Pannaconi                          | 38.692 | 16.041 | 8   |  |  |
| Paradisoni                         | 38.701 | 16.045 | 8   |  |  |
| Parghelia                          | 38.681 | 15.923 | 8   |  |  |
| Piscopio                           | 38.661 | 16.113 | 8   |  |  |
| Pizzo                              | 38.733 | 16.159 | 8   |  |  |
| Pozzo di Gotto                     | 38.152 | 15.232 | 8   |  |  |
| Ricadi                             | 38.626 | 15.867 | 8   |  |  |
| San Cono                           | 38.683 | 16.013 | 8   |  |  |
| San Costantino                     | 38.705 | 16.002 | 8   |  |  |
| San Gregorio d'Ippona              | 38.643 | 16.105 | 8   |  |  |
| San Leo Vecchio                    | 38.711 | 16.020 | 8   |  |  |
| San Marco                          | 38.675 | 16.010 | 8   |  |  |
| San Pietro di Bivona               | 38.703 | 16.111 | 8   |  |  |
| Sciconi                            | 38.691 | 16.031 | 8   |  |  |
| Serra San Bruno                    | 38.576 | 16.330 | 8   |  |  |
| Simbario                           | 38.611 | 16.335 | 8   |  |  |
| Spadola                            | 38.603 | 16.337 | 8   |  |  |
| Spilinga                           | 38.627 | 15.905 | 8   |  |  |
| Triparni                           | 38.681 | 16.067 | 8   |  |  |
| Agnana Calabra                     | 38.302 | 16.224 | 7-8 |  |  |
| Amendolea [vecchia]                | 37.988 | 15.892 | 7-8 |  |  |
| Bivona                             | 38.709 | 16.103 | 7-8 |  |  |
| Bivongi                            | 38.482 | 16.453 | 7-8 |  |  |
| Brattirò                           | 38.642 | 15.887 | 7-8 |  |  |
| Cardinale                          | 38.642 | 16.387 | 7-8 |  |  |
| Cessaniti                          | 38.663 | 16.026 | 7-8 |  |  |
| Ciaramiti                          | 38.650 | 15.862 | 7-8 |  |  |
| Condofuri                          | 38.005 | 15.858 | 7-8 |  |  |
| Gallicianò                         | 38.016 | 15.886 | 7-8 |  |  |
| Mandaradoni (VV)                   | 38.683 | 15.985 | 7-8 |  |  |
| Martone                            | 38.354 | 16.288 | 7-8 |  |  |
| Nicastrello                        | 38.681 | 16.289 | 7-8 |  |  |
| Pellaro                            | 38.025 | 15.656 | 7-8 |  |  |
| Pentedattilo                       | 37.953 | 15.762 | 7-8 |  |  |
| Pimene                             | 38.727 | 16.213 | 7-8 |  |  |
| Potenzoni                          | 38.689 | 16.003 | 7-8 |  |  |
| Roccaforte del Greco               | 38.045 | 15.900 | 7-8 |  |  |
| Roghudi [vecchio]                  | 38.049 | 15.916 | 7-8 |  |  |

|                            |        |        |     |  |  |
|----------------------------|--------|--------|-----|--|--|
| San Giovanni               | 38.675 | 15.973 | 7-8 |  |  |
| San Lorenzo                | 38.010 | 15.834 | 7-8 |  |  |
| San Luca (RC)              | 38.146 | 16.064 | 7-8 |  |  |
| San Luca (RC)              | 38.009 | 15.750 | 7-8 |  |  |
| San Nicola (Ardore)        | 38.202 | 16.145 | 7-8 |  |  |
| San Nicola da Crissa       | 38.663 | 16.285 | 7-8 |  |  |
| Santa Caterina dello Ionio | 38.534 | 16.521 | 7-8 |  |  |
| Sant'Onofrio               | 38.695 | 16.144 | 7-8 |  |  |
| Siderno Superiore          | 38.289 | 16.269 | 7-8 |  |  |
| Torre di Ruggiero          | 38.651 | 16.372 | 7-8 |  |  |
| Vallelonga                 | 38.646 | 16.294 | 7-8 |  |  |
| Vena Media                 | 38.669 | 16.057 | 7-8 |  |  |
| Vena Superiore             | 38.660 | 16.057 | 7-8 |  |  |
| Zaccanopoli                | 38.664 | 15.929 | 7-8 |  |  |
| Zambrone                   | 38.699 | 15.991 | 7-8 |  |  |
| Zammarò                    | 38.651 | 16.107 | 7-8 |  |  |
| Acconia                    | 38.837 | 16.267 | 7   |  |  |
| Camini                     | 38.432 | 16.483 | 7   |  |  |
| Castelmonardo              | 38.770 | 16.303 | 7   |  |  |
| Caulonia [Castelvetere]    | 38.381 | 16.409 | 7   |  |  |
| Curinga                    | 38.826 | 16.313 | 7   |  |  |
| Davoli                     | 38.649 | 16.485 | 7   |  |  |
| Fabrizia                   | 38.486 | 16.299 | 7   |  |  |
| Fossato Ionico             | 38.013 | 15.766 | 7   |  |  |
| Francavilla Angitola       | 38.777 | 16.271 | 7   |  |  |
| Gagliato                   | 38.676 | 16.462 | 7   |  |  |
| Gioiosa Ionica             | 38.332 | 16.302 | 7   |  |  |
| Guardavalle                | 38.505 | 16.505 | 7   |  |  |
| Maida                      | 38.858 | 16.365 | 7   |  |  |
| Maierato                   | 38.706 | 16.191 | 7   |  |  |
| Melito di Porto Salvo      | 37.920 | 15.784 | 7   |  |  |
| Montauro                   | 38.747 | 16.512 | 7   |  |  |
| Montebello Ionico          | 37.982 | 15.758 | 7   |  |  |
| Montesanto                 | 38.708 | 16.238 | 7   |  |  |
| Montesoro                  | 38.816 | 16.292 | 7   |  |  |
| Placanica                  | 38.414 | 16.451 | 7   |  |  |
| Poliolo                    | 38.753 | 16.310 | 7   |  |  |
| Precacore (Samo)           | 38.071 | 16.053 | 7   |  |  |
| Riace                      | 38.418 | 16.482 | 7   |  |  |
| Roccella Jonica [Roccella] | 38.324 | 16.405 | 7   |  |  |
| Samo [Precacore]           | 38.073 | 16.058 | 7   |  |  |
| San Sostene                | 38.636 | 16.487 | 7   |  |  |
| Satriano                   | 38.667 | 16.482 | 7   |  |  |
| Stignano                   | 38.417 | 16.471 | 7   |  |  |
| Stilo                      | 38.477 | 16.468 | 7   |  |  |
| Vibo Valentia [Monteleone] | 38.673 | 16.103 | 7   |  |  |
| Arasì                      | 38.139 | 15.737 | 6-7 |  |  |
| Bagaladi                   | 38.026 | 15.821 | 6-7 |  |  |
| Bova                       | 37.994 | 15.932 | 6-7 |  |  |
| Cannavò                    | 38.099 | 15.690 | 6-7 |  |  |
| Cerasi                     | 38.159 | 15.751 | 6-7 |  |  |
| Croce Valanidi             | 38.055 | 15.677 | 6-7 |  |  |
| Jacurso                    | 38.846 | 16.380 | 6-7 |  |  |
| Messina                    | 38.185 | 15.555 | 6-7 |  |  |
| Monasterace                | 38.453 | 16.551 | 6-7 |  |  |
| Motta San Giovanni         | 38.002 | 15.694 | 6-7 |  |  |
| Nasiti                     | 38.112 | 15.696 | 6-7 |  |  |
| Orti Superiore             | 38.150 | 15.724 | 6-7 |  |  |
| Pavigliana                 | 38.104 | 15.714 | 6-7 |  |  |
| Pazzano                    | 38.475 | 16.452 | 6-7 |  |  |
| Perlupo                    | 38.132 | 15.723 | 6-7 |  |  |
| Podargoni                  | 38.162 | 15.781 | 6-7 |  |  |
| Polia Antica               | 38.759 | 16.317 | 6-7 |  |  |
| Reggio di Calabria         | 38.108 | 15.647 | 6-7 |  |  |
| San Pietro a Maida         | 38.846 | 16.345 | 6-7 |  |  |
| Sant'Agata                 | 38.091 | 15.721 | 6-7 |  |  |
| Schindilifà                | 38.164 | 15.760 | 6-7 |  |  |
| Scilla                     | 38.253 | 15.717 | 6-7 |  |  |



|                                 |        |        |     |  |  |
|---------------------------------|--------|--------|-----|--|--|
| Straorino                       | 38.132 | 15.747 | 6-7 |  |  |
| Terreti                         | 38.119 | 15.711 | 6-7 |  |  |
| trecroci                        | 38.755 | 16.315 | 6-7 |  |  |
| Trizzino                        | 38.122 | 15.709 | 6-7 |  |  |
| Vena di Maida                   | 38.888 | 16.407 | 6-7 |  |  |
| Catanzaro                       | 38.905 | 16.594 | 6   |  |  |
| Cortale                         | 38.838 | 16.412 | 6   |  |  |
| Gasperina                       | 38.739 | 16.508 | 6   |  |  |
| Paola                           | 39.360 | 16.041 | 6   |  |  |
| Squillace                       | 38.781 | 16.519 | 6   |  |  |
| Albi                            | 39.024 | 16.597 | 5   |  |  |
| Arietta                         | 39.052 | 16.789 | 5   |  |  |
| Belcastro                       | 39.017 | 16.785 | 5   |  |  |
| Cropani                         | 38.967 | 16.782 | 5   |  |  |
| Gagliano                        | 38.920 | 16.562 | 5   |  |  |
| Magisano                        | 39.013 | 16.628 | 5   |  |  |
| Marcedusa                       | 39.027 | 16.836 | 5   |  |  |
| Feroletto Antico                | 38.962 | 16.388 | 4-5 |  |  |
| Fuscaldo                        | 39.415 | 16.030 | 4-5 |  |  |
| Petilia Policastro [Policastro] | 39.112 | 16.789 | 4-5 |  |  |
| Pianopoli [Feroletto Piano]     | 38.954 | 16.389 | 4-5 |  |  |
| Scalea                          | 39.814 | 15.792 | 4-5 |  |  |
| Sellia                          | 38.981 | 16.629 | 4-5 |  |  |
| Sersale                         | 39.011 | 16.728 | 4-5 |  |  |
| Simeri                          | 38.932 | 16.662 | 4-5 |  |  |
| Soveria Simeri                  | 38.946 | 16.679 | 4-5 |  |  |
| Taverna                         | 39.020 | 16.582 | 4-5 |  |  |
| Zagarise                        | 38.999 | 16.663 | 4-5 |  |  |
| Santa Sofia d'Epiro             | 39.546 | 16.329 | 4   |  |  |
|                                 |        |        |     |  |  |

| Table S8                                              |          |           |       |                    |                     |
|-------------------------------------------------------|----------|-----------|-------|--------------------|---------------------|
| MACROSEISMIC FIELD - 1 March 1783 (Mw 6.0) earthquake |          |           |       |                    |                     |
| Location                                              | Latitude | Longitude | I EMS | Epicenter latitude | Epicenter longitude |
| Panaia (VV)                                           | 38.68    | 16.234    | 8-9   | 38.728             | 16.2934             |
| Poliolo                                               | 38.753   | 16.31     | 8-9   |                    |                     |
| Capistrano                                            | 38.692   | 16.289    | 8     |                    |                     |
| Castelmonardo                                         | 38.77    | 16.303    | 8     |                    |                     |
| Filogaso                                              | 38.681   | 16.228    | 8     |                    |                     |
| Francavilla Angitola                                  | 38.777   | 16.271    | 8     |                    |                     |
| Polia Antica                                          | 38.759   | 16.317    | 8     |                    |                     |
| Trecroci [Polia Antica]                               | 38.755   | 16.315    | 8     |                    |                     |
| Vallelonga                                            | 38.646   | 16.294    | 8     |                    |                     |
| Bombile (Ardore)                                      | 38.205   | 16.173    | 7-8   |                    |                     |
| San Nicola da Crissa                                  | 38.681   | 16.289    | 7-8   |                    |                     |
| Nicastrello                                           | 38.663   | 16.285    | 7-8   |                    |                     |
| Castiglione Marittimo                                 | 38.981   | 16.159    | 7     |                    |                     |
| Maierato                                              | 38.706   | 16.191    | 7     |                    |                     |
| Montesanto                                            | 38.708   | 16.238    | 7     |                    |                     |
| Vibo Valentia [Monteleone]                            | 38.673   | 16.103    | 7     |                    |                     |
| Messina                                               | 38.185   | 15.555    | 6-7   |                    |                     |
| Mileto [vecchio]                                      | 38.593   | 16.08     | 6-7   |                    |                     |
| Catanzaro                                             | 38.905   | 16.594    | 6     |                    |                     |
| Santa Sofia d'Epiro                                   | 39.546   | 16.329    | 6     |                    |                     |
| Scalea                                                | 39.814   | 15.792    | 4-5   |                    |                     |

| Table S9                                                |          |           |       |                    |                     |
|---------------------------------------------------------|----------|-----------|-------|--------------------|---------------------|
| MACROSEISMIC FIELD - 28 March 1783 (Mw 6.81) earthquake |          |           |       |                    |                     |
| Location                                                | Latitude | Longitude | I EMS | Epicenter latitude | Epicenter longitude |
| Borgia                                                  | 38.825   | 16.510    | 10-11 | 38.828             | 164.603             |
| Cortale                                                 | 38.838   | 16.412    | 10-11 |                    |                     |
| San Floro                                               | 38.837   | 16.519    | 10-11 |                    |                     |
| Staletti                                                | 38.764   | 16.540    | 10-11 |                    |                     |
| Sant Elia (vallefiorita)                                | 38.783   | 16.446    | 10    |                    |                     |
| Girifalco                                               | 38.822   | 16.425    | 10    |                    |                     |
| Acconia                                                 | 38.837   | 16.267    | 9-10  |                    |                     |
| Amaroni                                                 | 38.792   | 16.447    | 9-10  |                    |                     |
| Cenadi                                                  | 38.719   | 16.415    | 9-10  |                    |                     |
| Centrache                                               | 38.729   | 16.430    | 9-10  |                    |                     |
| Curinga                                                 | 38.826   | 16.313    | 9-10  |                    |                     |
| Gasperina                                               | 38.739   | 16.508    | 9-10  |                    |                     |
| Jacurso                                                 | 38.846   | 16.380    | 9-10  |                    |                     |
| Maida                                                   | 38.858   | 16.365    | 9-10  |                    |                     |
| Marcellinara                                            | 38.928   | 16.494    | 9-10  |                    |                     |
| Olivadi                                                 | 38.725   | 16.424    | 9-10  |                    |                     |
| Palermi                                                 | 38.750   | 16.454    | 9-10  |                    |                     |
| Petrizzi                                                | 38.701   | 16.474    | 9-10  |                    |                     |
| San Pietro a Maida                                      | 38.846   | 16.345    | 9-10  |                    |                     |
| Squillace                                               | 38.781   | 16.519    | 9-10  |                    |                     |
| Argusto                                                 | 38.679   | 16.437    | 9-10  |                    |                     |
| Caraffa di Catanzaro                                    | 38.881   | 16.486    | 9-10  |                    |                     |
| Maierato                                                | 38.706   | 16.191    | 9-10  |                    |                     |
| Montepaone (CZ)                                         | 38.723   | 16.497    | 9-10  |                    |                     |
| Trecroci [Polia Antica]                                 | 38.755   | 16.315    | 9-10  |                    |                     |
| Vena di Maida                                           | 38.888   | 16.407    | 9-10  |                    |                     |
| Moladi                                                  | 38.590   | 16.002    | 9     |                    |                     |
| Pizzo                                                   | 38.733   | 16.159    | 9     |                    |                     |
| Altavilla [Corno]                                       | 39.333   | 16.311    | 9     |                    |                     |
| Castelmonardo                                           | 38.770   | 16.303    | 9     |                    |                     |
| Davoli                                                  | 38.649   | 16.485    | 9     |                    |                     |
| FrancaVilla Angitola                                    | 38.777   | 16.271    | 9     |                    |                     |
| Gagliato                                                | 38.676   | 16.462    | 9     |                    |                     |
| Isca sullo Ionio                                        | 38.600   | 16.520    | 9     |                    |                     |
| Monterosso Calabro                                      | 38.717   | 16.289    | 9     |                    |                     |
| Montesanto                                              | 38.708   | 16.238    | 9     |                    |                     |
| Montesoro                                               | 38.816   | 16.292    | 9     |                    |                     |
| Panaia (VV)                                             | 38.680   | 16.234    | 9     |                    |                     |
| San Costantino Calabro                                  | 38.631   | 16.073    | 9     |                    |                     |
| San Vito sullo Ionio                                    | 38.710   | 16.408    | 9     |                    |                     |
| Vallelonga                                              | 38.646   | 16.294    | 9     |                    |                     |
| Amato                                                   | 38.942   | 16.463    | 8-9   |                    |                     |
| Candidoni                                               | 38.505   | 16.086    | 8-9   |                    |                     |
| Capistrano                                              | 38.692   | 16.289    | 8-9   |                    |                     |
| Cardinale                                               | 38.642   | 16.387    | 8-9   |                    |                     |
| Castelvetere (RC)(Caulonia)                             | 38.381   | 16.409    | 8-9   |                    |                     |
| Chiaravalle Centrale                                    | 38.680   | 16.412    | 8-9   |                    |                     |
| Favelloni                                               | 38.682   | 16.028    | 8-9   |                    |                     |
| Longobardi (VV)                                         | 38.702   | 16.122    | 8-9   |                    |                     |
| Montauro                                                | 38.747   | 16.512    | 8-9   |                    |                     |
| Poliolo                                                 | 38.753   | 16.310    | 8-9   |                    |                     |
| San Pietro di Bivona                                    | 38.703   | 16.111    | 8-9   |                    |                     |
| San Sostene                                             | 38.636   | 16.487    | 8-9   |                    |                     |
| Sant'Onofrio                                            | 38.695   | 16.144    | 8-9   |                    |                     |
| Satriano                                                | 38.667   | 16.482    | 8-9   |                    |                     |
| Settingiano                                             | 38.913   | 16.514    | 8-9   |                    |                     |
| Simeri                                                  | 38.932   | 16.662    | 8-9   |                    |                     |
| Soverato Superiore                                      | 38.688   | 16.530    | 8-9   |                    |                     |
| Filogaso                                                | 38.681   | 16.228    | 8-9   |                    |                     |
| Pimene                                                  | 38.727   | 16.213    | 8-9   |                    |                     |
| San Marco                                               | 38.675   | 16.010    | 8-9   |                    |                     |
| San Nicola da Crissa                                    | 38.663   | 16.285    | 8-9   |                    |                     |
| Tiriolo                                                 | 38.947   | 16.509    | 8-9   |                    |                     |
| Briatico Vecchio                                        | 38.707   | 16.023    | 8     |                    |                     |

|                                             |        |        |     |  |  |
|---------------------------------------------|--------|--------|-----|--|--|
| Brognaturo                                  | 38.602 | 16.342 | 8   |  |  |
| Catanzaro                                   | 38.905 | 16.594 | 8   |  |  |
| Caulonia [Castelvetere]                     | 38.381 | 16.409 | 8   |  |  |
| Mammola (Mamolo?)                           | 38.362 | 16.240 | 8   |  |  |
| Nicastrello                                 | 38.681 | 16.289 | 8   |  |  |
| Piscopio                                    | 38.661 | 16.113 | 8   |  |  |
| Roccella Jonica [Roccella]                  | 38.324 | 16.405 | 8   |  |  |
| San Cono                                    | 38.683 | 16.013 | 8   |  |  |
| San Giovanni (Taverna) (CZ)                 | 39.018 | 16.594 | 8   |  |  |
| Serra San Bruno                             | 38.576 | 16.330 | 8   |  |  |
| Simbario                                    | 38.611 | 16.335 | 8   |  |  |
| Soveria Simeri                              | 38.946 | 16.679 | 8   |  |  |
| Spadola                                     | 38.603 | 16.337 | 8   |  |  |
| Tropea                                      | 38.675 | 15.899 | 8   |  |  |
| Vena Media                                  | 38.669 | 16.057 | 8   |  |  |
| Vena Superiore                              | 38.660 | 16.057 | 8   |  |  |
| Zammarò                                     | 38.651 | 16.107 | 8   |  |  |
| Badolato                                    | 38.568 | 16.524 | 8   |  |  |
| Bivona                                      | 38.709 | 16.103 | 8   |  |  |
| Calimera                                    | 38.556 | 16.018 | 8   |  |  |
| Conidoni                                    | 38.698 | 16.035 | 8   |  |  |
| Mezzocasale                                 | 38.646 | 16.106 | 8   |  |  |
| Miglierina                                  | 38.947 | 16.472 | 8   |  |  |
| Monasterace                                 | 38.453 | 16.551 | 8   |  |  |
| Roccelletta                                 | 38.807 | 16.595 | 8   |  |  |
| San Costantino                              | 38.705 | 16.002 | 8   |  |  |
| San Gregorio d'Ippona                       | 38.643 | 16.105 | 8   |  |  |
| San Leo Vecchio                             | 38.711 | 16.020 | 8   |  |  |
| San Nicola (Ardore)                         | 38.202 | 16.145 | 8   |  |  |
| San Pietro Apostolo [San Pietro di Tiriolo] | 39.003 | 16.467 | 8   |  |  |
| Santa Caterina dello Ionio                  | 38.534 | 16.521 | 8   |  |  |
| Sant'Andrea Apostolo dello Ionio            | 38.622 | 16.528 | 8   |  |  |
| Santo Stefano di Rogliano                   | 39.193 | 16.324 | 8   |  |  |
| Sciconi                                     | 38.691 | 16.031 | 8   |  |  |
| Siderno Superiore                           | 38.289 | 16.269 | 8   |  |  |
| Torre di Ruggiero                           | 38.651 | 16.372 | 8   |  |  |
| Triparni                                    | 38.681 | 16.067 | 8   |  |  |
| Agnana Calabra                              | 38.302 | 16.224 | 7-8 |  |  |
| Albi                                        | 39.024 | 16.597 | 7-8 |  |  |
| Bombile (Ardore)                            | 38.205 | 16.173 | 7-8 |  |  |
| Fabrizia                                    | 38.486 | 16.299 | 7-8 |  |  |
| Fossato Serralta                            | 38.995 | 16.580 | 7-8 |  |  |
| Gioiosa Ionica                              | 38.332 | 16.302 | 7-8 |  |  |
| Magisano                                    | 39.013 | 16.628 | 7-8 |  |  |
| Mandaradoni (VV)                            | 38.683 | 15.985 | 7-8 |  |  |
| Mantineo                                    | 38.683 | 16.057 | 7-8 |  |  |
| Maranise                                    | 39.012 | 16.577 | 7-8 |  |  |
| Noce                                        | 39.017 | 16.573 | 7-8 |  |  |
| Petilia Policastro [Policastro]             | 39.112 | 16.789 | 7-8 |  |  |
| Placanica                                   | 38.414 | 16.451 | 7-8 |  |  |
| San Giovanni di Gerace                      | 38.364 | 16.279 | 7-8 |  |  |
| Savuci                                      | 39.009 | 16.582 | 7-8 |  |  |
| Sellia                                      | 38.981 | 16.629 | 7-8 |  |  |
| Simeri Crichi (Crichi)                      | 38.954 | 16.639 | 7-8 |  |  |
| Stignano                                    | 38.417 | 16.471 | 7-8 |  |  |
| Stilo                                       | 38.477 | 16.468 | 7-8 |  |  |
| Taverna                                     | 39.020 | 16.582 | 7-8 |  |  |
| Accaria                                     | 38.980 | 16.365 | 7-8 |  |  |
| Angoli                                      | 38.971 | 16.436 | 7-8 |  |  |
| Aprigliano                                  | 39.240 | 16.342 | 7-8 |  |  |
| Bivongi                                     | 38.482 | 16.453 | 7-8 |  |  |
| Camini                                      | 38.432 | 16.483 | 7-8 |  |  |
| Castagna                                    | 39.053 | 16.436 | 7-8 |  |  |
| Catanzaro Marina                            | 38.822 | 16.613 | 7-8 |  |  |
| Celico                                      | 39.309 | 16.340 | 7-8 |  |  |
| Cerisano                                    | 39.276 | 16.175 | 7-8 |  |  |
| Cessaniti                                   | 38.663 | 16.026 | 7-8 |  |  |
| Ciaramiti                                   | 38.650 | 15.862 | 7-8 |  |  |

|                             |        |        |     |  |  |
|-----------------------------|--------|--------|-----|--|--|
| Cutro                       | 39.033 | 16.982 | 7-8 |  |  |
| Feroletto Antico            | 38.962 | 16.388 | 7-8 |  |  |
| Gimigliano                  | 38.973 | 16.527 | 7-8 |  |  |
| Guardavalle                 | 38.505 | 16.505 | 7-8 |  |  |
| Ievoli                      | 38.972 | 16.404 | 7-8 |  |  |
| Martone                     | 38.354 | 16.288 | 7-8 |  |  |
| Migliuso                    | 38.954 | 16.433 | 7-8 |  |  |
| Pannaconi                   | 38.692 | 16.041 | 7-8 |  |  |
| Paradisoni                  | 38.701 | 16.045 | 7-8 |  |  |
| Pianopoli [Feroletto Piano] | 38.954 | 16.389 | 7-8 |  |  |
| Polia Antica                | 38.759 | 16.317 | 7-8 |  |  |
| Potenzoni                   | 38.689 | 16.003 | 7-8 |  |  |
| Riace                       | 38.418 | 16.482 | 7-8 |  |  |
| San Pietro Taverna)         | 39.012 | 16.612 | 7-8 |  |  |
| Serrastretta                | 39.013 | 16.416 | 7-8 |  |  |
| Sorbo San Basile            | 39.019 | 16.569 | 7-8 |  |  |
| Cropani                     | 38.967 | 16.782 | 7   |  |  |
| Crosia                      | 39.566 | 16.773 | 7   |  |  |
| Pentone                     | 38.986 | 16.583 | 7   |  |  |
| Rovella                     | 39.303 | 16.288 | 7   |  |  |
| Scala Coeli                 | 39.445 | 16.890 | 7   |  |  |
| Vibo Valentia [Monteleone]  | 38.673 | 16.103 | 7   |  |  |
| Zagarise                    | 38.999 | 16.663 | 7   |  |  |
| Aiello Calabro              | 39.117 | 16.166 | 7   |  |  |
| Altilia                     | 39.129 | 16.252 | 7   |  |  |
| Amantea                     | 39.132 | 16.081 | 7   |  |  |
| Andali                      | 39.013 | 16.770 | 7   |  |  |
| Belcastro                   | 39.017 | 16.785 | 7   |  |  |
| Borgo Partenope [Torzano]   | 39.270 | 16.304 | 7   |  |  |
| Carolei                     | 39.253 | 16.218 | 7   |  |  |
| Carpanzano                  | 39.147 | 16.303 | 7   |  |  |
| Cosenza                     | 39.303 | 16.252 | 7   |  |  |
| crichi (CZ)                 | 38.955 | 16.639 | 7   |  |  |
| Crotone [Cotrone]           | 39.081 | 17.128 | 7   |  |  |
| Cuti                        | 39.183 | 16.320 | 7   |  |  |
| Dipignano                   | 39.237 | 16.252 | 7   |  |  |
| Donnici Inferiore           | 39.251 | 16.290 | 7   |  |  |
| Donnici Superiore           | 39.252 | 16.301 | 7   |  |  |
| Fagnano Castello            | 39.564 | 16.054 | 7   |  |  |
| Figline Vegliaturo          | 39.225 | 16.331 | 7   |  |  |
| Fondaco Vecchio             | 38.813 | 16.234 | 7   |  |  |
| Fuscaldo                    | 39.415 | 16.030 | 7   |  |  |
| Gagliano                    | 38.920 | 16.562 | 7   |  |  |
| Grimaldi                    | 39.142 | 16.235 | 7   |  |  |
| Iotta                       | 39.573 | 16.167 | 7   |  |  |
| Lappano                     | 39.319 | 16.312 | 7   |  |  |
| Laurignano                  | 39.277 | 16.241 | 7   |  |  |
| Le Castella                 | 38.908 | 17.022 | 7   |  |  |
| Longobardi (CS)             | 39.206 | 16.076 | 7   |  |  |
| Longobucco                  | 39.449 | 16.611 | 7   |  |  |
| Malito                      | 39.154 | 16.248 | 7   |  |  |
| Mangone                     | 39.203 | 16.334 | 7   |  |  |
| Marano Marchesato           | 39.313 | 16.172 | 7   |  |  |
| Marcedusa                   | 39.027 | 16.836 | 7   |  |  |
| Martirano                   | 39.080 | 16.248 | 7   |  |  |
| Marzi                       | 39.171 | 16.306 | 7   |  |  |
| Minnito                     | 39.310 | 16.343 | 7   |  |  |
| Montalto Uffugo             | 39.405 | 16.158 | 7   |  |  |
| Motta                       | 39.310 | 16.286 | 7   |  |  |
| Mottafollone                | 39.648 | 16.064 | 7   |  |  |
| Nocera Terinese             | 39.036 | 16.160 | 7   |  |  |
| Paola                       | 39.360 | 16.041 | 7   |  |  |
| Pedace                      | 39.274 | 16.340 | 7   |  |  |
| Perito                      | 39.273 | 16.330 | 7   |  |  |
| Piane Crati                 | 39.233 | 16.325 | 7   |  |  |
| Pietrafitta                 | 39.260 | 16.340 | 7   |  |  |
| Platania                    | 39.005 | 16.320 | 7   |  |  |
| Precacore (Samo)            | 38.071 | 16.053 | 7   |  |  |

|                                       |        |        |     |  |  |
|---------------------------------------|--------|--------|-----|--|--|
| Rende                                 | 39.331 | 16.183 | 7   |  |  |
| Roggiano Gravina                      | 39.615 | 16.157 | 7   |  |  |
| Rose                                  | 39.399 | 16.288 | 7   |  |  |
| Sambiase                              | 38.966 | 16.282 | 7   |  |  |
| Samo [Precacore]                      | 38.073 | 16.058 | 7   |  |  |
| San Benedetto                         | 39.339 | 16.302 | 7   |  |  |
| San Benedetto Ullano                  | 39.426 | 16.123 | 7   |  |  |
| San Mango d'Aquino                    | 39.058 | 16.191 | 7   |  |  |
| San Marco Argentano                   | 39.556 | 16.119 | 7   |  |  |
| San Pietro in Amantea                 | 39.136 | 16.112 | 7   |  |  |
| San Pietro in Guarano                 | 39.342 | 16.311 | 7   |  |  |
| San Sisto dei Valdesi                 | 39.377 | 16.150 | 7   |  |  |
| San Sosti                             | 39.660 | 16.028 | 7   |  |  |
| Sant'Eufemia                          | 38.920 | 16.254 | 7   |  |  |
| Serra Pedace                          | 39.277 | 16.346 | 7   |  |  |
| Spezzano della Sila [Spezzano Grande] | 39.299 | 16.340 | 7   |  |  |
| Tessano                               | 39.256 | 16.241 | 7   |  |  |
| Torano Castello                       | 39.504 | 16.147 | 7   |  |  |
| Zangarona                             | 38.970 | 16.344 | 7   |  |  |
| Zumpano                               | 39.310 | 16.291 | 7   |  |  |
| Arasì                                 | 38.139 | 15.737 | 6-7 |  |  |
| Arietta                               | 39.052 | 16.789 | 6-7 |  |  |
| Caraffa del Bianco                    | 38.092 | 16.087 | 6-7 |  |  |
| Gerace                                | 38.271 | 16.220 | 6-7 |  |  |
| Grotteria                             | 38.364 | 16.265 | 6-7 |  |  |
| Messina                               | 38.185 | 15.555 | 6-7 |  |  |
| Nasiti                                | 38.112 | 15.696 | 6-7 |  |  |
| Nicastro                              | 38.975 | 16.318 | 6-7 |  |  |
| Orti Superiore                        | 38.150 | 15.724 | 6-7 |  |  |
| Pavigliana                            | 38.104 | 15.714 | 6-7 |  |  |
| Pazzano                               | 38.475 | 16.452 | 6-7 |  |  |
| Perlupo                               | 38.132 | 15.723 | 6-7 |  |  |
| Podargoni                             | 38.162 | 15.781 | 6-7 |  |  |
| Reggio di Calabria                    | 38.108 | 15.647 | 6-7 |  |  |
| Santa Sofia d'Epiro                   | 39.546 | 16.329 | 6-7 |  |  |
| Schindilifà                           | 38.164 | 15.760 | 6-7 |  |  |
| Scilla                                | 38.253 | 15.717 | 6-7 |  |  |
| Straorino                             | 38.132 | 15.747 | 6-7 |  |  |
| Antonimina                            | 38.272 | 16.150 | 6-7 |  |  |
| Apriglianello                         | 39.086 | 17.052 | 6-7 |  |  |
| Barbalaconi                           | 38.634 | 15.873 | 6-7 |  |  |
| Belmonte Calabro                      | 39.160 | 16.079 | 6-7 |  |  |
| Bianco [vecchio]                      | 38.095 | 16.118 | 6-7 |  |  |
| Bisignano                             | 39.513 | 16.285 | 6-7 |  |  |
| Bocchigliero                          | 39.418 | 16.751 | 6-7 |  |  |
| Brattirò                              | 38.642 | 15.887 | 6-7 |  |  |
| Canolo                                | 38.314 | 16.200 | 6-7 |  |  |
| Carlopoli                             | 39.055 | 16.456 | 6-7 |  |  |
| Casignana                             | 38.101 | 16.089 | 6-7 |  |  |
| Casole Bruzio                         | 39.281 | 16.331 | 6-7 |  |  |
| Cassano allo Ionio                    | 39.784 | 16.318 | 6-7 |  |  |
| Castiglione Marittimo                 | 38.981 | 16.159 | 6-7 |  |  |
| Castrolibero [Castelfranco]           | 39.307 | 16.194 | 6-7 |  |  |
| Cicala                                | 39.021 | 16.486 | 6-7 |  |  |
| Croce Valanidi                        | 38.055 | 15.677 | 6-7 |  |  |
| Ioggi                                 | 39.576 | 16.080 | 6-7 |  |  |
| Macchia Albanese                      | 39.580 | 16.381 | 6-7 |  |  |
| Magli                                 | 39.278 | 16.312 | 6-7 |  |  |
| Morano Calabro (CS)                   | 39.844 | 16.136 | 6-7 |  |  |
| Papanice                              | 39.071 | 17.030 | 6-7 |  |  |
| Petronà                               | 39.043 | 16.758 | 6-7 |  |  |
| Portigliola                           | 38.228 | 16.202 | 6-7 |  |  |
| Pulsano                               | 39.253 | 16.238 | 6-7 |  |  |
| Roccabernarda                         | 39.133 | 16.868 | 6-7 |  |  |
| Rogliano                              | 39.178 | 16.323 | 6-7 |  |  |
| Rota Greca                            | 39.467 | 16.113 | 6-7 |  |  |
| Rovale                                | 39.250 | 16.545 | 6-7 |  |  |
| Rovito                                | 39.308 | 16.321 | 6-7 |  |  |



|                                 |        |        |     |  |  |
|---------------------------------|--------|--------|-----|--|--|
| San Fili                        | 38.456 | 16.034 | 6-7 |  |  |
| San Lucido                      | 39.307 | 16.049 | 6-7 |  |  |
| San Mauro Marchesato            | 39.103 | 16.925 | 6-7 |  |  |
| Santa Severina                  | 39.147 | 16.913 | 6-7 |  |  |
| Sant'Agata (RC)                 | 38.091 | 15.721 | 6-7 |  |  |
| Sant'Agata del Bianco           | 38.091 | 16.083 | 6-7 |  |  |
| Sant'Agata di Esaro             | 39.619 | 15.983 | 6-7 |  |  |
| Sant'Ippolito                   | 39.266 | 16.295 | 6-7 |  |  |
| Sersale                         | 39.011 | 16.728 | 6-7 |  |  |
| Terravecchia                    | 39.465 | 16.946 | 6-7 |  |  |
| Terreti                         | 38.119 | 15.711 | 6-7 |  |  |
| Trizzino                        | 38.122 | 15.709 | 6-7 |  |  |
| Vaccarizzo                      | 39.410 | 16.135 | 6-7 |  |  |
| Vincolise                       | 39.018 | 16.612 | 6-7 |  |  |
| Africo [vecchio]                | 38.065 | 15.980 | 6   |  |  |
| Cerva                           | 39.022 | 16.745 | 6   |  |  |
| Mesoraca                        | 39.077 | 16.789 | 6   |  |  |
| Amendolea [vecchia]             | 37.988 | 15.892 | 6   |  |  |
| Belsito                         | 39.174 | 16.287 | 6   |  |  |
| Cannavò                         | 38.099 | 15.690 | 6   |  |  |
| Castrovillari                   | 39.814 | 16.202 | 6   |  |  |
| Cerasi                          | 38.159 | 15.751 | 6   |  |  |
| Condofuri                       | 38.005 | 15.858 | 6   |  |  |
| Conflenti (Conflenti Inferiore) | 39.071 | 16.286 | 6   |  |  |
| Conflenti Superiore             | 39.067 | 16.293 | 6   |  |  |
| Cuturella                       | 38.987 | 16.778 | 6   |  |  |
| Falerna                         | 39.002 | 16.173 | 6   |  |  |
| Flavetto                        | 39.311 | 16.319 | 6   |  |  |
| Gizzeria                        | 38.981 | 16.206 | 6   |  |  |
| Melito di Porto Salvo           | 37.920 | 15.784 | 6   |  |  |
| Mendicino                       | 39.260 | 16.193 | 6   |  |  |
| Montebello Ionico               | 37.982 | 15.758 | 6   |  |  |
| Motta San Giovanni              | 38.002 | 15.694 | 6   |  |  |
| Motta Santa Lucia               | 39.091 | 16.290 | 6   |  |  |
| Pellaro                         | 38.025 | 15.656 | 6   |  |  |
| Pentedattilo (Villa di Melito)  | 37.953 | 15.762 | 6   |  |  |
| Roccaforte del Greco            | 38.045 | 15.900 | 6   |  |  |
| Roghudi [vecchio]               | 38.049 | 15.916 | 6   |  |  |
| Rossano                         | 39.574 | 16.635 | 6   |  |  |
| San Lorenzo                     | 38.010 | 15.834 | 6   |  |  |
| San Luca (RC)                   | 38.146 | 16.064 | 6   |  |  |
| San Luca (RC)                   | 38.009 | 15.750 | 6   |  |  |
| San Martino di Finita           | 39.489 | 16.108 | 6   |  |  |
| Sartano                         | 39.510 | 16.178 | 6   |  |  |
| Savuto                          | 39.071 | 16.164 | 6   |  |  |
| Serra d'Aiello                  | 39.089 | 16.129 | 6   |  |  |
| Spezzano Albanese               | 39.670 | 16.311 | 6   |  |  |
| Terrati                         | 39.134 | 16.142 | 6   |  |  |
| Trecchina                       | 40.026 | 15.777 | 6   |  |  |
| Trenta                          | 39.283 | 16.321 | 6   |  |  |
| Altilia                         | 39.182 | 16.882 | 5-6 |  |  |
| Cerzeto                         | 39.507 | 16.115 | 5-6 |  |  |
| Cetraro                         | 39.516 | 15.941 | 5-6 |  |  |
| Falconara Albanese              | 39.275 | 16.091 | 5-6 |  |  |
| Fiumefreddo Bruzio              | 39.235 | 16.066 | 5-6 |  |  |
| Fossato Ionico                  | 38.013 | 15.766 | 5-6 |  |  |
| Galliciano                      | 38.016 | 15.886 | 5-6 |  |  |
| Laghitello                      | 39.167 | 16.153 | 5-6 |  |  |
| Lago                            | 39.169 | 16.147 | 5-6 |  |  |
| Malvito                         | 39.597 | 16.053 | 5-6 |  |  |
| Scalea                          | 39.814 | 15.792 | 5-6 |  |  |
| Scandale                        | 39.121 | 16.960 | 5-6 |  |  |
| Bagaladi                        | 38.026 | 15.821 | 5   |  |  |
| Bova                            | 37.994 | 15.932 | 5   |  |  |
| Cinquefrondi                    | 38.417 | 16.095 | 5   |  |  |
| Cotronei                        | 39.159 | 16.778 | 5   |  |  |
| Diamante                        | 39.678 | 15.820 | 5   |  |  |
| Isola di Capo Rizzuto           | 38.959 | 17.096 | 5   |  |  |

| Table S10                                                       |          |           |       |                    |                     |
|-----------------------------------------------------------------|----------|-----------|-------|--------------------|---------------------|
| MACROSEISMIC FIELD - 1791 (Mw 5.89) CENTRAL-CALABRIA EARTHQUAKE |          |           |       |                    |                     |
| Location                                                        | Latitude | Longitude | I EMS | Epicenter latitude | Epicenter longitude |
| Soriano Calabro (VV)                                            | 38.598   | 16.230    | 8-9   | 38.612             | 16.276              |
| Spadola (VV)                                                    | 38.604   | 16.337    | 8-9   |                    |                     |
| Brognaturo (VV)                                                 | 38.602   | 16.341    | 8-9   |                    |                     |
| Serra San Bruno (VV)                                            | 38.577   | 16.330    | 8-9   |                    |                     |
| Simbario (VV)                                                   | 38.611   | 16.335    | 8-9   |                    |                     |
| Arena (VV)                                                      | 38.563   | 16.209    | 8     |                    |                     |
| Capistrano (VV)                                                 | 38.692   | 16.289    | 8     |                    |                     |
| Calabrò (VV)                                                    | 38.613   | 16.076    | 8     |                    |                     |
| Centrache (CZ)                                                  | 38.729   | 16.430    | 8     |                    |                     |
| Dasà (VV)                                                       | 38.565   | 16.196    | 8     |                    |                     |
| Mileto (VV)                                                     | 38.609   | 16.068    | 8     |                    |                     |
| Monterosso Calabro (VV)                                         | 38.717   | 16.289    | 8     |                    |                     |
| Olivadi (CZ)                                                    | 38.725   | 16.424    | 8     |                    |                     |
| Simiatoni (VV)                                                  | 38.558   | 16.179    | 8     |                    |                     |
| Chiaravalle Centrale (CZ)                                       | 38.681   | 16.412    | 7-8   |                    |                     |
| Caridà (RC)                                                     | 38.524   | 16.135    | 7-8   |                    |                     |
| Polia (VV)                                                      | 38.751   | 16.312    | 7-8   |                    |                     |
| Poliolo (VV)                                                    | 38.753   | 16.310    | 7-8   |                    |                     |
| San Basilio (VV)                                                | 38.623   | 16.250    | 7-8   |                    |                     |
| San Vito sullo Ionio (CZ)                                       | 38.711   | 16.408    | 7-8   |                    |                     |
| Sant'Angelo (VV)                                                | 38.612   | 16.169    | 7-8   |                    |                     |
| Santa Barbara (VV)                                              | 38.639   | 16.209    | 7-8   |                    |                     |
| Dinami (VV)                                                     | 38.529   | 16.147    | 7-8   |                    |                     |
| Filadelfia (VV)                                                 | 38.784   | 16.292    | 7-8   |                    |                     |
| Francavilla Angitola (VV)                                       | 38.778   | 16.271    | 7-8   |                    |                     |
| Torre di Ruggiero (CZ)                                          | 38.651   | 16.372    | 7-8   |                    |                     |
| San Pietro (RC)                                                 | 38.525   | 16.143    | 7-8   |                    |                     |
| Bracciara (VV)                                                  | 38.592   | 16.197    | 7     |                    |                     |
| Pizzoni (VV)                                                    | 38.623   | 16.252    | 7     |                    |                     |
| Vazzano (VV)                                                    | 38.632   | 16.247    | 7     |                    |                     |
| Bivongi (RC)                                                    | 38.483   | 16.453    | 7     |                    |                     |
| Gerocarne (VV)                                                  | 38.587   | 16.219    | 7     |                    |                     |
| Paravati (VV)                                                   | 38.592   | 16.060    | 7     |                    |                     |
| San Giovanni (VV)                                               | 38.585   | 16.084    | 7     |                    |                     |
| Acquaro (VV)                                                    | 38.556   | 16.189    | 7     |                    |                     |
| Bracciara (VV)                                                  | 38.566   | 16.168    | 7     |                    |                     |
| Certosa di Santo Stefano del Bosco (VV)                         | 38.565   | 16.319    | 7     |                    |                     |
| Ciano (VV)                                                      | 38.576   | 16.213    | 7     |                    |                     |
| Cortale (CZ)                                                    | 38.839   | 16.412    | 7     |                    |                     |
| Daffinà (VV)                                                    | 38.559   | 16.105    | 7     |                    |                     |
| Francica (VV)                                                   | 38.617   | 16.099    | 7     |                    |                     |
| Limpidi (VV)                                                    | 38.541   | 16.174    | 7     |                    |                     |
| Melicuccà (VV)                                                  | 38.536   | 16.158    | 7     |                    |                     |
| Pizzo (VV)                                                      | 38.734   | 16.159    | 7     |                    |                     |
| Potami (VV)                                                     | 38.580   | 16.207    | 7     |                    |                     |
| Pronia (VV)                                                     | 38.579   | 16.190    | 7     |                    |                     |
| Rombiolo (VV)                                                   | 38.597   | 16.005    | 7     |                    |                     |
| San Gregorio d'Ippona (VV)                                      | 38.643   | 16.105    | 7     |                    |                     |
| San Pietro a Maida (CZ)                                         | 38.846   | 16.345    | 7     |                    |                     |
| Siderno Superiore (RC)                                          | 38.290   | 16.270    | 7     |                    |                     |
| Stignano (RC)                                                   | 38.418   | 16.471    | 7     |                    |                     |
| Tropea (VV)                                                     | 38.675   | 15.899    | 7     |                    |                     |
| Anoia Superiore (RC)                                            | 38.432   | 16.097    | 6-7   |                    |                     |
| Cinquefrondi (RC)                                               | 38.418   | 16.095    | 6     |                    |                     |
| Galatro (RC)                                                    | 38.460   | 16.109    | 6     |                    |                     |
| Garopoli (RC)                                                   | 38.527   | 16.145    | 6     |                    |                     |
| Polistena (RC)                                                  | 38.406   | 16.076    | 6     |                    |                     |
| Squillace (CZ)                                                  | 38.781   | 16.519    | 6     |                    |                     |
| Palmi (RC)                                                      | 38.359   | 15.849    | 5-6   |                    |                     |
| Radicena (RC)                                                   | 38.355   | 16.017    | 5-6   |                    |                     |
| Altilia (KR)                                                    | 39.183   | 16.882    | 5     |                    |                     |
| Cutro (KR)                                                      | 39.033   | 16.983    | 5     |                    |                     |
| Isola di Capo Rizzuto (KR)                                      | 38.959   | 17.096    | 5     |                    |                     |
| Monteleone (VV)                                                 | 38.675   | 16.102    | 5     |                    |                     |

|                           |        |        |   |  |  |
|---------------------------|--------|--------|---|--|--|
| Roccabernarda (KR)        | 39.133 | 16.868 | 5 |  |  |
| San Mauro Marchesato (KR) | 39.104 | 16.925 | 5 |  |  |
| Santa Severina (KR)       | 39.147 | 16.913 | 5 |  |  |
| Jonadi (VV)               | 38.627 | 16.055 | 5 |  |  |
| Nao (VV)                  | 38.629 | 16.062 | 5 |  |  |
| Badolato (CZ)             | 38.569 | 16.524 | 5 |  |  |
| Candidoni (RC)            | 38.505 | 16.086 | 5 |  |  |
| Catanzaro (CZ)            | 38.915 | 16.586 | 5 |  |  |
| Laureana di Borrello (RC) | 38.491 | 16.082 | 5 |  |  |
| Reggio di Calabria (RC)   | 38.109 | 15.647 | 5 |  |  |
| San Giorgio Morgeto (RC)  | 38.387 | 16.107 | 5 |  |  |
| Serrata (RC)              | 38.512 | 16.101 | 5 |  |  |

| Table S11                                                               |          |           |       |                    |                     |
|-------------------------------------------------------------------------|----------|-----------|-------|--------------------|---------------------|
| MACROSEISMIC FIELD - 1894 (Mw 6.08) SOUTHERN- CALABRIA SEISMIC SEQUENCE |          |           |       |                    |                     |
| Location                                                                | Latitude | Longitude | I EMS | Epicenter latitude | Epicenter longitude |
| San Procopio                                                            | 15.891   | 38.281    | 9     | 38.284             | 15.887              |
| Sant'Eufemia d'Aspromonte                                               | 15.857   | 38.263    | 9     |                    |                     |
| Sant'Anna                                                               | 15.887   | 38.322    | 8     |                    |                     |
| Bagnara Calabria                                                        | 15.805   | 38.286    | 8     |                    |                     |
| Castellace                                                              | 15.94    | 38.315    | 8     |                    |                     |
| Delianuova                                                              | 15.918   | 38.236    | 8     |                    |                     |
| Melia                                                                   | 15.758   | 38.231    | 8     |                    |                     |
| Palmi                                                                   | 15.849   | 38.358    | 8     |                    |                     |
| Seminara                                                                | 15.872   | 38.335    | 8     |                    |                     |
| Solano Inferiore                                                        | 15.799   | 38.256    | 8     |                    |                     |
| Tresilico                                                               | 15.983   | 38.299    | 8     |                    |                     |
| Oppido Mamertina                                                        | 15.985   | 38.291    | 8     |                    |                     |
| Benestare                                                               | 16.139   | 38.184    | 8     |                    |                     |
| Barritteri                                                              | 15.85    | 38.328    | 7-8   |                    |                     |
| Favazzina                                                               | 15.759   | 38.26     | 7-8   |                    |                     |
| Mosorrofa                                                               | 15.724   | 38.098    | 7-8   |                    |                     |
| Pellegrina                                                              | 15.825   | 38.295    | 7-8   |                    |                     |
| Platì                                                                   | 16.044   | 38.221    | 7-8   |                    |                     |
| Rosarno                                                                 | 15.976   | 38.487    | 7-8   |                    |                     |
| Sinopoli (Superiore)                                                    | 15.878   | 38.264    | 7-8   |                    |                     |
| Condofuri                                                               | 15.858   | 38.005    | 7-8   |                    |                     |
| Iatrinoli                                                               | 16.007   | 38.353    | 7-8   |                    |                     |
| Maropati                                                                | 16.097   | 38.441    | 7-8   |                    |                     |
| Melicuccà                                                               | 15.881   | 38.302    | 7-8   |                    |                     |
| Mezzocasale                                                             | 16.106   | 38.646    | 7-8   |                    |                     |
| Molochio                                                                | 16.032   | 38.308    | 7-8   |                    |                     |
| Musalà                                                                  | 15.671   | 38.214    | 7-8   |                    |                     |
| Rizziconi                                                               | 15.959   | 38.411    | 7-8   |                    |                     |
| Roghudi [vecchio]                                                       | 15.916   | 38.049    | 7-8   |                    |                     |
| San Roberto                                                             | 15.736   | 38.211    | 7-8   |                    |                     |
| Acquaro                                                                 | 15.899   | 38.268    | 7-8   |                    |                     |
| Africo [vecchio]                                                        | 15.98    | 38.065    | 7-8   |                    |                     |
| Bianco                                                                  | 16.15    | 38.088    | 7-8   |                    |                     |
| Campo Calabro                                                           | 15.659   | 38.213    | 7-8   |                    |                     |
| Fiumara (San Nicola)                                                    | 15.693   | 38.211    | 7-8   |                    |                     |
| Reggio di Calabria                                                      | 15.647   | 38.108    | 7-8   |                    |                     |
| Sambatello                                                              | 15.692   | 38.178    | 7-8   |                    |                     |
| San Martino                                                             | 15.975   | 38.361    | 7     |                    |                     |
| Cataforio                                                               | 15.718   | 38.088    | 7     |                    |                     |
| Ceramida                                                                | 15.832   | 38.3      | 7     |                    |                     |
| Cosoleto                                                                | 15.927   | 38.275    | 7     |                    |                     |
| Lubrichi                                                                | 15.95    | 38.27     | 7     |                    |                     |
| Radicensa                                                               | 16.017   | 38.355    | 7     |                    |                     |
| Santa Cristina d'Aspromonte                                             | 15.97    | 38.255    | 7     |                    |                     |
| Scadà                                                                   | 15.666   | 38.212    | 7     |                    |                     |
| Scido                                                                   | 15.933   | 38.245    | 7     |                    |                     |
| Sitizano                                                                | 15.939   | 38.281    | 7     |                    |                     |
| Terranova Sappo Minulio                                                 | 16.007   | 38.321    | 7     |                    |                     |
| Varapodio                                                               | 15.984   | 38.315    | 7     |                    |                     |
| Agnana Calabria                                                         | 16.224   | 38.302    | 7     |                    |                     |
| Anoia (Inferiore)                                                       | 16.08    | 38.435    | 7     |                    |                     |
| Antonimina                                                              | 16.15    | 38.272    | 7     |                    |                     |
| Arena                                                                   | 16.209   | 38.562    | 7     |                    |                     |
| Bagaladi                                                                | 15.821   | 38.026    | 7     |                    |                     |
| Barcellona Pozzo di Gotto                                               | 15.215   | 38.146    | 7     |                    |                     |
| Bovalino (Bovalino Marina)                                              | 16.178   | 38.149    | 7     |                    |                     |
| Bovalino Superiore                                                      | 16.156   | 38.17     | 7     |                    |                     |
| Bruzzano Vecchio                                                        | 16.077   | 38.021    | 7     |                    |                     |
| Cannitello                                                              | 15.657   | 38.234    | 7     |                    |                     |
| Caraffa del Bianco                                                      | 16.087   | 38.092    | 7     |                    |                     |
| Cardeto                                                                 | 15.768   | 38.084    | 7     |                    |                     |
| Casignana                                                               | 16.089   | 38.101    | 7     |                    |                     |
| Catona                                                                  | 15.643   | 38.185    | 7     |                    |                     |
| Cessaniti                                                               | 16.026   | 38.663    | 7     |                    |                     |

|                               |        |        |   |  |  |
|-------------------------------|--------|--------|---|--|--|
| Ciminà                        | 16.141 | 38.245 | 7 |  |  |
| Cinquefrondi                  | 16.095 | 38.417 | 7 |  |  |
| Cirella                       | 16.099 | 38.232 | 7 |  |  |
| Comparni                      | 16.056 | 38.568 | 7 |  |  |
| Condoianni                    | 16.196 | 38.208 | 7 |  |  |
| Conidoni                      | 16.035 | 38.698 | 7 |  |  |
| Drosi                         | 15.956 | 38.426 | 7 |  |  |
| Faro Superiore                | 15.583 | 38.265 | 7 |  |  |
| Ferruzzano                    | 16.087 | 38.039 | 7 |  |  |
| Gallico                       | 15.657 | 38.168 | 7 |  |  |
| Gallina                       | 15.678 | 38.086 | 7 |  |  |
| Garopoli                      | 16.145 | 38.526 | 7 |  |  |
| Giffone                       | 16.149 | 38.438 | 7 |  |  |
| Gioia Tauro                   | 15.899 | 38.426 | 7 |  |  |
| Gualtieri Sicaminò            | 15.317 | 38.162 | 7 |  |  |
| Jonadi                        | 16.055 | 38.627 | 7 |  |  |
| Laganadi                      | 15.741 | 38.173 | 7 |  |  |
| Limbadi                       | 15.966 | 38.555 | 7 |  |  |
| Merì                          | 15.25  | 38.166 | 7 |  |  |
| Messina                       | 15.555 | 38.185 | 7 |  |  |
| Monforte San Giorgio          | 15.382 | 38.155 | 7 |  |  |
| Polistena                     | 16.076 | 38.406 | 7 |  |  |
| Portigliola                   | 16.202 | 38.228 | 7 |  |  |
| Roccaforte del Greco          | 15.9   | 38.045 | 7 |  |  |
| Roccavaldina                  | 15.373 | 38.182 | 7 |  |  |
| Rometta                       | 15.414 | 38.172 | 7 |  |  |
| Rosalì                        | 15.68  | 38.198 | 7 |  |  |
| San Giorgio Morgeto           | 16.107 | 38.386 | 7 |  |  |
| San Gregorio                  | 15.653 | 38.059 | 7 |  |  |
| San Gregorio d'Ippona         | 16.105 | 38.643 | 7 |  |  |
| San Lorenzo                   | 15.834 | 38.01  | 7 |  |  |
| San Nicola                    | 16.145 | 38.202 | 7 |  |  |
| San Pierfedele                | 16.143 | 38.525 | 7 |  |  |
| San Pietro di Caridà (Caridà) | 16.135 | 38.523 | 7 |  |  |
| Sant'Agata del Bianco         | 16.083 | 38.091 | 7 |  |  |
| Sant'Alessio in Aspromonte    | 15.758 | 38.172 | 7 |  |  |
| Sant'Ilario dello Ionio       | 16.195 | 38.218 | 7 |  |  |
| Sant'Onofrio                  | 16.144 | 38.695 | 7 |  |  |
| Santa Giorgia                 | 15.936 | 38.253 | 7 |  |  |
| Santo Stefano di Briga        | 15.479 | 38.1   | 7 |  |  |
| Saponara                      | 15.434 | 38.193 | 7 |  |  |
| Sciconi                       | 16.031 | 38.691 | 7 |  |  |
| Scilla                        | 15.717 | 38.253 | 7 |  |  |
| Serrata                       | 16.101 | 38.512 | 7 |  |  |
| Simbario                      | 16.335 | 38.611 | 7 |  |  |
| Soriano Calabro               | 16.23  | 38.598 | 7 |  |  |
| Stefanaconi                   | 16.122 | 38.673 | 7 |  |  |
| Triparni                      | 16.067 | 38.681 | 7 |  |  |
| Valdina                       | 15.371 | 38.193 | 7 |  |  |
| Venetico                      | 15.381 | 38.193 | 7 |  |  |
| Villa San Giovanni            | 15.638 | 38.22  | 7 |  |  |
| Zammarò                       | 16.107 | 38.651 | 7 |  |  |
| Bova                          | 15.932 | 37.994 | 7 |  |  |
| Dasà                          | 16.196 | 38.564 | 7 |  |  |
| Dinami                        | 16.147 | 38.528 | 7 |  |  |
| Gerace                        | 16.22  | 38.271 | 7 |  |  |
| Gerocarne                     | 16.219 | 38.587 | 7 |  |  |
| Mammola                       | 16.24  | 38.362 | 7 |  |  |
| Nicotera Marina               | 15.933 | 38.546 | 7 |  |  |
| Piscopio                      | 16.113 | 38.661 | 7 |  |  |
| Salice Calabro                | 15.659 | 38.197 | 7 |  |  |
| Spadafora                     | 15.375 | 38.221 | 7 |  |  |
| Spadola                       | 16.337 | 38.603 | 7 |  |  |
| Torregrotta                   | 15.351 | 38.197 | 7 |  |  |
| vena                          | 16.103 | 38.673 | 7 |  |  |
| Villa Mesa                    | 15.718 | 38.196 | 7 |  |  |
| Canolo                        | 16.2   | 38.314 | 7 |  |  |
| Sorianello                    | 16.233 | 38.592 | 7 |  |  |

|                             |        |        |     |  |  |
|-----------------------------|--------|--------|-----|--|--|
| Sansone                     | 15.832 | 38.298 | 6-7 |  |  |
| Archi                       | 15.661 | 38.147 | 6-7 |  |  |
| Ardore Marina               | 16.207 | 38.176 | 6-7 |  |  |
| Borgia                      | 16.51  | 38.825 | 6-7 |  |  |
| Calimera                    | 16.018 | 38.556 | 6-7 |  |  |
| Favelloni                   | 16.028 | 38.682 | 6-7 |  |  |
| Feroletto della Chiesa      | 16.064 | 38.465 | 6-7 |  |  |
| Motta San Giovanni          | 15.694 | 38.002 | 6-7 |  |  |
| Pellaro                     | 15.656 | 38.025 | 6-7 |  |  |
| San Martino                 | 15.39  | 38.207 | 6-7 |  |  |
| Serro                       | 15.722 | 38.199 | 6-7 |  |  |
| Siderno Superiore           | 16.269 | 38.289 | 6-7 |  |  |
| Sinopoli Inferiore          | 15.886 | 38.261 | 6-7 |  |  |
| Armà                        | 15.787 | 37.935 | 6-7 |  |  |
| Drapia                      | 15.911 | 38.664 | 6-7 |  |  |
| Filogaso                    | 16.228 | 38.681 | 6-7 |  |  |
| Francica                    | 16.099 | 38.616 | 6-7 |  |  |
| Galatro                     | 16.109 | 38.46  | 6-7 |  |  |
| Grotteria                   | 16.265 | 38.364 | 6-7 |  |  |
| Maierato                    | 16.191 | 38.706 | 6-7 |  |  |
| Marchesana                  | 15.151 | 38.141 | 6-7 |  |  |
| Melito di Porto Salvo       | 15.784 | 37.92  | 6-7 |  |  |
| Milanesi                    | 15.722 | 38.201 | 6-7 |  |  |
| Mileto                      | 16.068 | 38.608 | 6-7 |  |  |
| Piale                       | 15.648 | 38.224 | 6-7 |  |  |
| Podargoni                   | 15.781 | 38.162 | 6-7 |  |  |
| Ponte Termini               | 15.18  | 38.132 | 6-7 |  |  |
| Prunella                    | 15.795 | 37.939 | 6-7 |  |  |
| Roccella Valdemone          | 15.009 | 37.932 | 6-7 |  |  |
| Rodì Milici (Rodì)          | 15.17  | 38.109 | 6-7 |  |  |
| Rombiolo                    | 16.005 | 38.596 | 6-7 |  |  |
| Samo                        | 16.058 | 38.073 | 6-7 |  |  |
| San Costantino Calabro      | 16.073 | 38.631 | 6-7 |  |  |
| San Filippo del Mela        | 15.274 | 38.169 | 6-7 |  |  |
| Santa Lucia del Mela        | 15.281 | 38.14  | 6-7 |  |  |
| Santo Stefano in Aspromonte | 15.789 | 38.168 | 6-7 |  |  |
| Spilinga                    | 15.905 | 38.627 | 6-7 |  |  |
| Stelletanone                | 16.084 | 38.485 | 6-7 |  |  |
| Tropea                      | 15.899 | 38.675 | 6-7 |  |  |
| Vazzano                     | 16.247 | 38.632 | 6-7 |  |  |
| Ardore                      | 16.168 | 38.191 | 6-7 |  |  |
| Palizzi                     | 15.986 | 37.966 | 6-7 |  |  |
| Pizzo                       | 16.159 | 38.733 | 6-7 |  |  |
| Pizzoni                     | 16.252 | 38.623 | 6-7 |  |  |
| San Calogero                | 16.024 | 38.573 | 6-7 |  |  |
| Calanna                     | 15.724 | 38.183 | 6-7 |  |  |
| San Salvatore               | 15.728 | 38.088 | 6   |  |  |
| Solano Superiore            | 15.797 | 38.249 | 6   |  |  |
| Stromboli (San Vincenzo)    | 15.235 | 38.806 | 6   |  |  |
| Torre Faro                  | 15.646 | 38.266 | 6   |  |  |
| Bellantone                  | 16.091 | 38.497 | 6   |  |  |
| Careri                      | 16.115 | 38.177 | 6   |  |  |
| Castroreale                 | 15.211 | 38.099 | 6   |  |  |
| Cittanova                   | 16.081 | 38.353 | 6   |  |  |
| Laureana di Borrello        | 16.083 | 38.491 | 6   |  |  |
| Locri                       | 16.264 | 38.234 | 6   |  |  |
| Milazzo                     | 15.24  | 38.224 | 6   |  |  |
| Parghelia                   | 15.923 | 38.681 | 6   |  |  |
| Potenzoni                   | 16.003 | 38.689 | 6   |  |  |
| San Leo                     | 16.024 | 38.719 | 6   |  |  |
| Bova Marina                 | 15.919 | 37.931 | 6   |  |  |
| Brancaleone Superiore       | 16.081 | 37.981 | 6   |  |  |
| Briatico                    | 16.032 | 38.725 | 6   |  |  |
| Candidoni                   | 16.086 | 38.505 | 6   |  |  |
| Caulonia                    | 16.409 | 38.381 | 6   |  |  |
| Cortale                     | 16.412 | 38.838 | 6   |  |  |
| Filicudi Porto              | 14.581 | 38.56  | 6   |  |  |
| Ganzirri                    | 15.611 | 38.257 | 6   |  |  |



|                                          |        |        |     |  |  |
|------------------------------------------|--------|--------|-----|--|--|
| Gioiosa Ionica                           | 16.302 | 38.332 | 6   |  |  |
| Guidomandri infer                        | 15.46  | 38.043 | 6   |  |  |
| Itala                                    | 15.437 | 38.05  | 6   |  |  |
| Lipari                                   | 14.955 | 38.467 | 6   |  |  |
| Marina di Gioiosa Jonica                 | 16.33  | 38.301 | 6   |  |  |
| Montebello Ionico                        | 15.758 | 37.982 | 6   |  |  |
| Nicotera                                 | 15.938 | 38.551 | 6   |  |  |
| Panarea (San Pietro)                     | 15.077 | 38.637 | 6   |  |  |
| Roccella Jonica                          | 16.405 | 38.324 | 6   |  |  |
| Serra San Bruno                          | 16.33  | 38.576 | 6   |  |  |
| Siderno                                  | 16.294 | 38.269 | 6   |  |  |
| Squillace                                | 16.519 | 38.781 | 6   |  |  |
| Staiti                                   | 16.034 | 37.999 | 6   |  |  |
| Vena Inferiore                           | 16.056 | 38.672 | 6   |  |  |
| Villa San Giuseppe                       | 15.671 | 38.187 | 6   |  |  |
| Zungri                                   | 15.984 | 38.654 | 6   |  |  |
| Maida                                    | 16.365 | 38.858 | 6   |  |  |
| Vena Superiore                           | 16.057 | 38.66  | 6   |  |  |
| Santa Teresa di Riva                     | 15.367 | 37.945 | 5-6 |  |  |
| San Ferdinando                           | 15.915 | 38.482 | 5   |  |  |
| San Luca                                 | 16.064 | 38.146 | 5   |  |  |
| Vena Media                               | 16.057 | 38.669 | 5   |  |  |
| Bafia                                    | 15.206 | 38.074 | 5   |  |  |
| Milici                                   | 15.169 | 38.083 | 5   |  |  |
| Acireale                                 | 15.166 | 37.613 | 5   |  |  |
| Alì                                      | 15.417 | 38.026 | 5   |  |  |
| Canneto                                  | 14.962 | 38.49  | 5   |  |  |
| Furnari                                  | 15.124 | 38.104 | 5   |  |  |
| Gioiosa Marea                            | 14.896 | 38.174 | 5   |  |  |
| Lamezia Terme (Nicastro)                 | 16.318 | 38.974 | 5   |  |  |
| Licodia Eubea                            | 14.7   | 37.155 | 5   |  |  |
| Linguaglossa                             | 15.139 | 37.842 | 5   |  |  |
| Melilli                                  | 15.128 | 37.179 | 5   |  |  |
| Mineo                                    | 14.691 | 37.266 | 5   |  |  |
| Motta Camastra                           | 15.17  | 37.894 | 5   |  |  |
| Naso                                     | 14.788 | 38.122 | 5   |  |  |
| Nicolosi                                 | 15.026 | 37.614 | 5   |  |  |
| Nizza di Sicilia                         | 15.41  | 37.989 | 5   |  |  |
| Palagonia                                | 14.746 | 37.326 | 5   |  |  |
| Paternò                                  | 14.902 | 37.566 | 5   |  |  |
| Patti                                    | 14.966 | 38.138 | 5   |  |  |
| Ramacca                                  | 14.694 | 37.384 | 5   |  |  |
| Santa Marina Salina                      | 14.873 | 38.562 | 5   |  |  |
| Zafferana Etnea                          | 15.105 | 37.692 | 5   |  |  |
| Bronte                                   | 14.834 | 37.786 | 5   |  |  |
| Malvagna                                 | 15.055 | 37.917 | 5   |  |  |
| Raccuja                                  | 14.91  | 38.055 | 5   |  |  |
| Sambiasè                                 | 16.282 | 38.966 | 5   |  |  |
| San Piero Patti                          | 14.966 | 38.051 | 5   |  |  |
| Scaletta Zanclea (Guidomandri Inferiore) | 15.46  | 38.042 | 5   |  |  |
| Catalimita                               | 15.211 | 38.083 | 5   |  |  |
| Capo dell'Armi [faro]                    | 15.681 | 37.957 | 5   |  |  |
| Alicudi Porto                            | 14.361 | 38.535 | 4-5 |  |  |
| Belpasso                                 | 14.979 | 37.59  | 4-5 |  |  |
| Caltagirone                              | 14.52  | 37.231 | 4-5 |  |  |
| Catanzaro                                | 16.594 | 38.905 | 4-5 |  |  |
| Santa Venerina                           | 15.139 | 37.687 | 4-5 |  |  |
| Stilo                                    | 16.468 | 38.477 | 4-5 |  |  |
| Catania                                  | 15.087 | 37.502 | 4-5 |  |  |
| Giarre                                   | 15.181 | 37.724 | 4-5 |  |  |
| Lauria                                   | 15.837 | 40.046 | 4-5 |  |  |
| Montalbano Elicona                       | 15.013 | 38.023 | 4-5 |  |  |
| Montemurro                               | 15.991 | 40.297 | 4-5 |  |  |
| Regalbuto                                | 14.641 | 37.651 | 4-5 |  |  |
| Scordia                                  | 14.843 | 37.296 | 4-5 |  |  |
| Sortino                                  | 15.027 | 37.156 | 4-5 |  |  |
| Vizzini                                  | 14.755 | 37.162 | 4-5 |  |  |
| Vulcano (Porto di Levante)               | 14.959 | 38.416 | 4-5 |  |  |

|                           |        |        |     |  |  |
|---------------------------|--------|--------|-----|--|--|
| Grammichele               | 14.636 | 37.214 | 4-5 |  |  |
| Biancavilla               | 14.867 | 37.643 | 4   |  |  |
| Filadelfia                | 16.292 | 38.783 | 4   |  |  |
| Lagonegro                 | 15.764 | 40.124 | 4   |  |  |
| Motta Sant'Anastasia      | 14.969 | 37.512 | 4   |  |  |
| Randazzo                  | 14.948 | 37.877 | 4   |  |  |
| San Giovanni in Fiore     | 16.699 | 39.254 | 4   |  |  |
| Santo Stefano di Camastra | 14.351 | 38.015 | 4   |  |  |
| Tiriolo                   | 16.509 | 38.947 | 4   |  |  |
| Adrano                    | 14.834 | 37.667 | 4   |  |  |
| Cosenza                   | 16.252 | 39.303 | 4   |  |  |
| Francofonte               | 14.881 | 37.23  | 4   |  |  |
| Mistretta                 | 14.361 | 37.928 | 4   |  |  |
| Noto                      | 15.07  | 36.89  | 4   |  |  |
| San Fratello              | 14.597 | 38.016 | 4   |  |  |
| Siracusa                  | 15.286 | 37.073 | 4   |  |  |
| Viagrande                 | 15.098 | 37.61  | 4   |  |  |
| Scigliano (Calvisi)       | 16.306 | 39.127 | 4   |  |  |
| Vitica                    | 15.849 | 38.341 | 4   |  |  |
| Cesarò                    | 14.714 | 37.843 | 3-4 |  |  |
| Capizzi                   | 14.479 | 37.848 | 3-4 |  |  |
| Cropani                   | 16.782 | 38.967 | 3-4 |  |  |
| Scicli                    | 14.706 | 36.792 | 3-4 |  |  |
| Castelbuono               | 14.09  | 37.929 | 3   |  |  |
| Rinella                   | 14.828 | 38.55  | 3   |  |  |
| Mormanno                  | 15.989 | 39.889 | 3   |  |  |
| Crotone                   | 17.128 | 39.081 | 3   |  |  |
| Leonforte                 | 14.393 | 37.638 | 3   |  |  |
| Licata                    | 13.939 | 37.101 | 3   |  |  |
| Palermo                   | 13.362 | 38.115 | 3   |  |  |
| Maiori                    | 14.643 | 40.65  | 2-3 |  |  |
| Piazza Armerina           | 14.368 | 37.384 | 2-3 |  |  |
| Aidone                    | 14.446 | 37.415 | 2-3 |  |  |
| Pomarico                  | 16.549 | 40.514 | 2   |  |  |

| Table S12                                                               |          |           |       |                    |                     |
|-------------------------------------------------------------------------|----------|-----------|-------|--------------------|---------------------|
| MACROSEISMIC FIELD - 1908 (Mw 6.83) SOUTHERN-CALABRIA – NORTHERN SICILY |          |           |       |                    |                     |
| Location                                                                | Latitude | Longitude | I EMS | Epicenter latitude | Epicenter longitude |
| Cataforio (RC)                                                          | 38.088   | 15.718    | 10-11 | 38.173             | 15.678              |
| Concessa (RC)                                                           | 38.193   | 15.64     | 10-11 |                    |                     |
| Faro Superiore (ME)                                                     | 38.265   | 15.583    | 10-11 |                    |                     |
| Favani (RC)                                                             | 38.223   | 15.72     | 10-11 |                    |                     |
| Ferrito (RC)                                                            | 38.235   | 15.66     | 10-11 |                    |                     |
| Limbone (RC)                                                            | 38.121   | 15.69     | 10-11 |                    |                     |
| Macellari (RC)                                                          | 38.04    | 15.673    | 10-11 |                    |                     |
| Melia (RC)                                                              | 38.229   | 15.758    | 10-11 |                    |                     |
| Messina (ME)                                                            | 38.188   | 15.549    | 10-11 |                    |                     |
| Mosorrofa (RC)                                                          | 38.098   | 15.724    | 10-11 |                    |                     |
| Musalà (RC)                                                             | 38.215   | 15.671    | 10-11 |                    |                     |
| Nasiti (RC)                                                             | 38.112   | 15.697    | 10-11 |                    |                     |
| Nocilla (RC)                                                            | 38.012   | 15.653    | 10-11 |                    |                     |
| Ortì Superiore (RC)                                                     | 38.151   | 15.724    | 10-11 |                    |                     |
| Perlupo (RC)                                                            | 38.133   | 15.723    | 10-11 |                    |                     |
| Piale (RC)                                                              | 38.224   | 15.648    | 10-11 |                    |                     |
| Prumo (RC)                                                              | 38.103   | 15.685    | 10-11 |                    |                     |
| Riparo Vecchio (RC)                                                     | 38.099   | 15.684    | 10-11 |                    |                     |
| Salice Calabro (RC)                                                     | 38.197   | 15.659    | 10-11 |                    |                     |
| San Cristoforo (RC)                                                     | 38.104   | 15.673    | 10-11 |                    |                     |
| Spirito Santo (RC)                                                      | 38.106   | 15.66     | 10-11 |                    |                     |
| Trizzino (RC)                                                           | 38.123   | 15.709    | 10-11 |                    |                     |
| Acciarello (RC)                                                         | 38.213   | 15.638    | 10    |                    |                     |
| Acquacalda (RC)                                                         | 38.208   | 15.759    | 10    |                    |                     |
| Arasi (RC)                                                              | 38.139   | 15.737    | 10    |                    |                     |
| Archi (RC)                                                              | 38.148   | 15.661    | 10    |                    |                     |
| Barritteri (RC)                                                         | 38.329   | 15.85     | 10    |                    |                     |
| Belfatto (RC)                                                           | 38.187   | 15.669    | 10    |                    |                     |
| Bocale (RC)                                                             | 38.01    | 15.638    | 10    |                    |                     |
| Calanna (RC)                                                            | 38.184   | 15.724    | 10    |                    |                     |
| Camaro Inferiore (ME)                                                   | 38.192   | 15.524    | 10    |                    |                     |
| Camaro Superiore (ME)                                                   | 38.193   | 15.52     | 10    |                    |                     |
| Campo Calabro (RC)                                                      | 38.214   | 15.659    | 10    |                    |                     |
| Campo Piale (RC)                                                        | 38.221   | 15.654    | 10    |                    |                     |
| Cannavò (RC)                                                            | 38.099   | 15.69     | 10    |                    |                     |
| Cannitello (RC)                                                         | 38.234   | 15.657    | 10    |                    |                     |
| Castellace (RC)                                                         | 38.316   | 15.94     | 10    |                    |                     |
| Catona (RC)                                                             | 38.185   | 15.643    | 10    |                    |                     |
| Cerasi (RC)                                                             | 38.16    | 15.751    | 10    |                    |                     |
| Contesse (ME)                                                           | 38.158   | 15.535    | 10    |                    |                     |
| Croce (RC)                                                              | 38.213   | 15.698    | 10    |                    |                     |
| Curcuraci (ME)                                                          | 38.261   | 15.568    | 10    |                    |                     |
| Fornace (RC)                                                            | 37.987   | 15.651    | 10    |                    |                     |
| Gallico (RC)                                                            | 38.168   | 15.657    | 10    |                    |                     |
| Gallina (RC)                                                            | 38.087   | 15.678    | 10    |                    |                     |
| Gazzi (ME)                                                              | 38.163   | 15.54     | 10    |                    |                     |
| Lubrichi (RC)                                                           | 38.271   | 15.95     | 10    |                    |                     |
| Lucia (RC)                                                              | 38.206   | 15.758    | 10    |                    |                     |
| Milanesi (RC)                                                           | 38.202   | 15.722    | 10    |                    |                     |
| Occhio (RC)                                                             | 38.039   | 15.658    | 10    |                    |                     |
| Pace (ME)                                                               | 38.24    | 15.579    | 10    |                    |                     |
| Pavigliana (RC)                                                         | 38.104   | 15.714    | 10    |                    |                     |
| Pellaro (RC)                                                            | 38.026   | 15.656    | 10    |                    |                     |
| Pentimele (RC)                                                          | 38.14    | 15.659    | 10    |                    |                     |
| Pettogallico (RC)                                                       | 38.187   | 15.696    | 10    |                    |                     |
| Porticatello (ME)                                                       | 38.239   | 15.572    | 10    |                    |                     |
| Porticello (RC)                                                         | 38.24    | 15.672    | 10    |                    |                     |
| Quattronari (RC)                                                        | 38.029   | 15.664    | 10    |                    |                     |
| Reggio di Calabria (RC)                                                 | 38.109   | 15.647    | 10    |                    |                     |
| Rosalì (RC)                                                             | 38.199   | 15.68     | 10    |                    |                     |
| Sambatello (RC)                                                         | 38.178   | 15.692    | 10    |                    |                     |
| San Gregorio (RC)                                                       | 38.06    | 15.653    | 10    |                    |                     |
| San Leo (RC)                                                            | 38.051   | 15.654    | 10    |                    |                     |
| San Nicola (RC)                                                         | 38.212   | 15.693    | 10    |                    |                     |

|                                  |        |        |      |  |  |
|----------------------------------|--------|--------|------|--|--|
| San Peri (RC)                    | 38.206 | 15.729 | 10   |  |  |
| San Pietro (RC)                  | 38.207 | 15.682 | 10   |  |  |
| San Roberto (RC)                 | 38.212 | 15.736 | 10   |  |  |
| San Rocco (RC)                   | 38.216 | 15.693 | 10   |  |  |
| San Salvatore (RC)               | 38.089 | 15.728 | 10   |  |  |
| Santa Caterina (RC)              | 38.13  | 15.657 | 10   |  |  |
| Santa Domenica (RC)              | 38.18  | 15.672 | 10   |  |  |
| Sant'Agata (ME)                  | 38.256 | 15.603 | 10   |  |  |
| Sant'Alessio in Aspromonte (RC)  | 38.173 | 15.758 | 10   |  |  |
| Sant'Elia di Condera (RC)        | 38.109 | 15.671 | 10   |  |  |
| Sant'Eufemia d'Aspromonte (RC)   | 38.264 | 15.857 | 10   |  |  |
| Santori (RC)                     | 38.232 | 15.643 | 10   |  |  |
| Sbarre (RC)                      | 38.094 | 15.638 | 10   |  |  |
| Solano Inferiore (RC)            | 38.257 | 15.799 | 10   |  |  |
| Solano Superiore (RC)            | 38.25  | 15.797 | 10   |  |  |
| Straorino (RC)                   | 38.133 | 15.746 | 10   |  |  |
| Terreti (RC)                     | 38.12  | 15.711 | 10   |  |  |
| Torre Faro (ME)                  | 38.267 | 15.646 | 10   |  |  |
| Villa Mesa (RC)                  | 38.197 | 15.718 | 10   |  |  |
| Villa San Giovanni (RC)          | 38.221 | 15.638 | 10   |  |  |
| Villa San Giuseppe (RC)          | 38.188 | 15.671 | 10   |  |  |
| Annunziata (ME)                  | 38.224 | 15.555 | 9-10 |  |  |
| Bardonaro (ME)                   | 38.178 | 15.515 | 9-10 |  |  |
| Bordonaro (ME)                   | 38.178 | 15.515 | 9-10 |  |  |
| Favazzina (RC)                   | 38.261 | 15.759 | 9-10 |  |  |
| Gallico Marina (RC)              | 38.167 | 15.648 | 9-10 |  |  |
| Granatari (ME)                   | 38.267 | 15.633 | 9-10 |  |  |
| Calvaruso (ME)                   | 38.222 | 15.453 | 8.0  |  |  |
| Grotta (ME)                      | 38.247 | 15.582 | 9-10 |  |  |
| Lazzaro (RC)                     | 37.977 | 15.66  | 9-10 |  |  |
| Orti Inferiore (RC)              | 38.146 | 15.714 | 9-10 |  |  |
| San Giorgio (RC)                 | 38.356 | 15.853 | 9-10 |  |  |
| San Paolo (ME)                   | 38.071 | 15.488 | 9-10 |  |  |
| San Sperato (RC)                 | 38.099 | 15.674 | 9-10 |  |  |
| Valanidi (RC)                    | 38.04  | 15.717 | 9-10 |  |  |
| Bagnara Calabria (RC)            | 38.287 | 15.805 | 9    |  |  |
| Cardeto (RC)                     | 38.085 | 15.768 | 9    |  |  |
| Contemplazione (ME)              | 38.233 | 15.571 | 9    |  |  |
| Ganzirri (ME)                    | 38.259 | 15.611 | 9    |  |  |
| Laganadi (RC)                    | 38.174 | 15.741 | 9    |  |  |
| Massa San Giovanni (ME)          | 38.266 | 15.545 | 9    |  |  |
| Melito di Porto Salvo (RC)       | 37.92  | 15.784 | 9    |  |  |
| Motta San Giovanni (RC)          | 38.003 | 15.694 | 9    |  |  |
| Pellegrina (RC)                  | 38.296 | 15.825 | 9    |  |  |
| Platì (RC)                       | 38.221 | 16.044 | 9    |  |  |
| Podargoni (RC)                   | 38.163 | 15.781 | 9    |  |  |
| Prunella (RC)                    | 37.94  | 15.795 | 9    |  |  |
| Ritiro (ME)                      | 38.214 | 15.54  | 9    |  |  |
| Rupa (RC)                        | 38.105 | 15.724 | 9    |  |  |
| Salvatore dei Greci (ME)         | 38.218 | 15.564 | 9    |  |  |
| San Procopio (RC)                | 38.282 | 15.891 | 9    |  |  |
| Santa Lucia (ME)                 | 38.157 | 15.52  | 9    |  |  |
| Santo Stefano in Aspromonte (RC) | 38.169 | 15.789 | 9    |  |  |
| Vinco (RC)                       | 38.109 | 15.723 | 9    |  |  |
| Vito Inferiore (RC)              | 38.126 | 15.671 | 9    |  |  |
| Vito Superiore (RC)              | 38.133 | 15.679 | 9    |  |  |
| Ceramida (RC)                    | 38.301 | 15.832 | 8-9  |  |  |
| Cirella (RC)                     | 38.233 | 16.099 | 8-9  |  |  |
| Cumia Superiore (ME)             | 38.174 | 15.498 | 8-9  |  |  |
| Galati Marina (ME)               | 38.109 | 15.509 | 8-9  |  |  |
| Ghorio di Roccaforte (RC)        | 38.05  | 15.903 | 8-9  |  |  |
| Malati (ME)                      | 38.075 | 15.492 | 8-9  |  |  |
| Palmi (RC)                       | 38.359 | 15.849 | 8-9  |  |  |
| Pezzo Inferiore (RC)             | 38.232 | 15.638 | 8-9  |  |  |
| Roccaforte del Greco (RC)        | 38.045 | 15.9   | 8-9  |  |  |
| San Nicola de' Legistis (VV)     | 38.562 | 15.992 | 8-9  |  |  |
| Sant'Anna (RC)                   | 38.323 | 15.887 | 8-9  |  |  |
| Schindilifà (RC)                 | 38.164 | 15.76  | 8-9  |  |  |

|                                  |        |        |     |  |  |
|----------------------------------|--------|--------|-----|--|--|
| Seminara (RC)                    | 38.336 | 15.872 | 8-9 |  |  |
| Bagaladi (RC)                    | 38.027 | 15.821 | 8   |  |  |
| Bauso (ME)                       | 38.232 | 15.436 | 8   |  |  |
| Bova (RC)                        | 37.994 | 15.932 | 8   |  |  |
| Bruzzano Vecchio (RC)            | 38.024 | 16.079 | 8   |  |  |
| Chorio di San Lorenzo (RC)       | 37.987 | 15.812 | 8   |  |  |
| Condofuri (RC)                   | 38.005 | 15.858 | 8   |  |  |
| Condoianni (RC)                  | 38.209 | 16.196 | 8   |  |  |
| Fossato Ionico (RC)              | 38.013 | 15.766 | 8   |  |  |
| Galatro (RC)                     | 38.46  | 16.109 | 8   |  |  |
| Gallicianò (RC)                  | 38.017 | 15.886 | 8   |  |  |
| Massa San Giorgio (ME)           | 38.275 | 15.537 | 8   |  |  |
| Massa San Nicola (ME)            | 38.271 | 15.542 | 8   |  |  |
| Massa Santa Lucia (ME)           | 38.27  | 15.549 | 8   |  |  |
| Messignadi (RC)                  | 38.297 | 15.997 | 8   |  |  |
| Montebello Ionico (RC)           | 37.982 | 15.758 | 8   |  |  |
| Motticella (RC)                  | 38.026 | 16.055 | 8   |  |  |
| Nao (VV)                         | 38.629 | 16.062 | 8   |  |  |
| Oppido Mamertina (RC)            | 38.291 | 15.985 | 8   |  |  |
| Pentedattilo (RC)                | 37.953 | 15.762 | 8   |  |  |
| Pezzo Superiore (RC)             | 38.229 | 15.641 | 8   |  |  |
| Pistunina (ME)                   | 38.15  | 15.53  | 8   |  |  |
| Roghudi (RC)                     | 38.049 | 15.916 | 8   |  |  |
| Rometta (ME)                     | 38.172 | 15.414 | 8   |  |  |
| Salice (ME)                      | 38.251 | 15.493 | 8   |  |  |
| Saline Ioniche (RC)              | 37.945 | 15.71  | 8   |  |  |
| San Carlo (RC)                   | 37.959 | 15.89  | 8   |  |  |
| San Lorenzo (RC)                 | 38.011 | 15.834 | 8   |  |  |
| San Luca (RC)                    | 38.147 | 16.064 | 8   |  |  |
| San Martino (ME)                 | 38.208 | 15.39  | 8   |  |  |
| San Martino (RC)                 | 38.362 | 15.976 | 8   |  |  |
| San Pantaleone (RC)              | 37.989 | 15.844 | 8   |  |  |
| San Pier Niceto (ME)             | 38.158 | 15.351 | 8   |  |  |
| Santa Cristina d'Aspromonte (RC) | 38.255 | 15.97  | 8   |  |  |
| Santa Margherita (ME)            | 38.1   | 15.495 | 8   |  |  |
| Santo (ME)                       | 38.175 | 15.529 | 8   |  |  |
| Saponara (ME)                    | 38.193 | 15.434 | 8   |  |  |
| Scala (ME)                       | 38.214 | 15.53  | 8   |  |  |
| Scilla (RC)                      | 38.254 | 15.717 | 8   |  |  |
| Serro (ME)                       | 38.225 | 15.459 | 8   |  |  |
| Sinopoli Inferiore (RC)          | 38.262 | 15.886 | 8   |  |  |
| Sinopoli Superiore (RC)          | 38.264 | 15.878 | 8   |  |  |
| Sinopoli Vecchio (RC)            | 38.281 | 15.909 | 8   |  |  |
| Sitizano (RC)                    | 38.281 | 15.939 | 8   |  |  |
| Stefanaconi (VV)                 | 38.673 | 16.122 | 8   |  |  |
| Tremestieri (ME)                 | 38.138 | 15.525 | 8   |  |  |
| Trunca (RC)                      | 38.047 | 15.761 | 8   |  |  |
| Valdina (ME)                     | 38.194 | 15.37  | 8   |  |  |
| Venetico (ME)                    | 38.194 | 15.381 | 8   |  |  |
| Zafferia (ME)                    | 38.152 | 15.506 | 8   |  |  |
| Acquaro (VV)                     | 38.556 | 16.189 | 7-8 |  |  |
| Africo (RC)                      | 38.066 | 15.98  | 7-8 |  |  |
| Agnana Calabria (RC)             | 38.303 | 16.224 | 7-8 |  |  |
| Alì Marina (ME)                  | 38.004 | 15.423 | 7-8 |  |  |
| Alì Superiore (ME)               | 38.027 | 15.417 | 7-8 |  |  |
| Altolia (ME)                     | 38.076 | 15.446 | 7-8 |  |  |
| Amendolea Vecchia (RC)           | 37.991 | 15.897 | 7-8 |  |  |
| Barbalaconi (VV)                 | 38.635 | 15.873 | 7-8 |  |  |
| Bianco (RC)                      | 38.089 | 16.15  | 7-8 |  |  |
| Bovalino Superiore (RC)          | 38.171 | 16.156 | 7-8 |  |  |
| Briga (ME)                       | 38.079 | 15.473 | 7-8 |  |  |
| Brivadi (VV)                     | 38.636 | 15.856 | 7-8 |  |  |
| Canolo (RC)                      | 38.315 | 16.2   | 7-8 |  |  |
| Caraffa del Bianco (RC)          | 38.092 | 16.087 | 7-8 |  |  |
| Carciadi (VV)                    | 38.628 | 15.908 | 7-8 |  |  |
| Caroni (VV)                      | 38.568 | 15.96  | 7-8 |  |  |
| Casalnuovo (RC)                  | 38.056 | 15.993 | 7-8 |  |  |
| Casignana (RC)                   | 38.101 | 16.089 | 7-8 |  |  |

|                              |        |        |     |  |  |
|------------------------------|--------|--------|-----|--|--|
| Castanea delle Furie (ME)    | 38.262 | 15.521 | 7-8 |  |  |
| Castroreale (ME)             | 38.1   | 15.211 | 7-8 |  |  |
| Cinquefrondi (RC)            | 38.418 | 16.095 | 7-8 |  |  |
| Condò (ME)                   | 38.173 | 15.328 | 7-8 |  |  |
| Cosoleto (RC)                | 38.275 | 15.927 | 7-8 |  |  |
| Dasà (VV)                    | 38.565 | 16.196 | 7-8 |  |  |
| Delianuova (RC)              | 38.237 | 15.918 | 7-8 |  |  |
| Dinami (VV)                  | 38.529 | 16.147 | 7-8 |  |  |
| Feroletto Antico (CZ)        | 38.962 | 16.388 | 7-8 |  |  |
| Feroletto della Chiesa (RC)  | 38.466 | 16.064 | 7-8 |  |  |
| Ferruzzano (RC)              | 38.04  | 16.087 | 7-8 |  |  |
| Gaggi (ME)                   | 37.860 | 15.222 | 7-8 |  |  |
| Galati Inferiore (ME)        | 38.11  | 15.503 | 7-8 |  |  |
| Galati Superiore (ME)        | 38.112 | 15.495 | 7-8 |  |  |
| Gerace Marina (RC)           | 38.235 | 16.264 | 7-8 |  |  |
| Gerace Superiore (RC)        | 38.271 | 16.221 | 7-8 |  |  |
| Gesso (ME)                   | 38.235 | 15.469 | 7-8 |  |  |
| Ghorio di Roghudi (RC)       | 38.056 | 15.926 | 7-8 |  |  |
| Gualtieri Sicaminò (ME)      | 38.163 | 15.317 | 7-8 |  |  |
| Iatrinoli (RC)               | 38.354 | 16.007 | 7-8 |  |  |
| Lampazzone (VV)              | 38.632 | 15.875 | 7-8 |  |  |
| Larderia Inferiore (ME)      | 38.142 | 15.5   | 7-8 |  |  |
| Larderia Superiore (ME)      | 38.14  | 15.494 | 7-8 |  |  |
| Limbadi (VV)                 | 38.556 | 15.966 | 7-8 |  |  |
| Limpidi (VV)                 | 38.541 | 16.174 | 7-8 |  |  |
| Maropati (RC)                | 38.441 | 16.097 | 7-8 |  |  |
| Melicuccà (RC)               | 38.303 | 15.881 | 7-8 |  |  |
| Melicucco (RC)               | 38.433 | 16.06  | 7-8 |  |  |
| Mezzocasale (VV)             | 38.647 | 16.106 | 7-8 |  |  |
| Mileto (VV)                  | 38.609 | 16.068 | 7-8 |  |  |
| Mili San Marco (ME)          | 38.122 | 15.508 | 7-8 |  |  |
| Mirto di Siderno (RC)        | 38.29  | 16.293 | 7-8 |  |  |
| Molochio (RC)                | 38.308 | 16.032 | 7-8 |  |  |
| Monforte San Giorgio (ME)    | 38.156 | 15.382 | 7-8 |  |  |
| Motta Filocastro (VV)        | 38.572 | 15.975 | 7-8 |  |  |
| Orsigliadi (VV)              | 38.629 | 15.861 | 7-8 |  |  |
| Panaia (VV)                  | 38.623 | 15.892 | 7-8 |  |  |
| Pardesca (RC)                | 38.082 | 16.122 | 7-8 |  |  |
| Pezzolo (ME)                 | 38.085 | 15.458 | 7-8 |  |  |
| Pietrapennata (RC)           | 37.984 | 16.008 | 7-8 |  |  |
| Piminoro (RC)                | 38.271 | 16.008 | 7-8 |  |  |
| Polistena (RC)               | 38.406 | 16.076 | 7-8 |  |  |
| Polsi (RC)                   | 38.164 | 15.96  | 7-8 |  |  |
| Portigliola (RC)             | 38.228 | 16.202 | 7-8 |  |  |
| Precacore (RC)               | 38.071 | 16.053 | 7-8 |  |  |
| Rizziconi (RC)               | 38.411 | 15.959 | 7-8 |  |  |
| Rosarno (RC)                 | 38.488 | 15.976 | 7-8 |  |  |
| Salvi (RC)                   | 38.309 | 16.249 | 7-8 |  |  |
| San Calogero (VV)            | 38.574 | 16.024 | 7-8 |  |  |
| San Fili (RC)                | 38.457 | 16.034 | 7-8 |  |  |
| San Filippo Inferiore (ME)   | 38.163 | 15.511 | 7-8 |  |  |
| San Giorgio Morgeto (RC)     | 38.387 | 16.107 | 7-8 |  |  |
| San Michele (ME)             | 38.224 | 15.527 | 7-8 |  |  |
| San Nicolò (VV)              | 38.633 | 15.851 | 7-8 |  |  |
| San Pietro di Milazzo (ME)   | 38.193 | 15.25  | 7-8 |  |  |
| San Placido Calonerò (ME)    | 38.078 | 15.488 | 7-8 |  |  |
| San Vincenzo (RC)            | 38.105 | 15.709 | 7-8 |  |  |
| Santa Domenica (VV)          | 38.663 | 15.866 | 7-8 |  |  |
| Sant'Agata del Bianco (RC)   | 38.092 | 16.083 | 7-8 |  |  |
| Sant'Ilario dello Ionio (RC) | 38.218 | 16.195 | 7-8 |  |  |
| Santuario di Polsi (RC)      | 38.165 | 15.96  | 7-8 |  |  |
| Scido (RC)                   | 38.245 | 15.933 | 7-8 |  |  |
| Scrofario (RC)               | 38.335 | 16.018 | 7-8 |  |  |
| Serrata (RC)                 | 38.512 | 16.101 | 7-8 |  |  |
| Siderno (RC)                 | 38.27  | 16.294 | 7-8 |  |  |
| Siderno Superiore (RC)       | 38.29  | 16.27  | 7-8 |  |  |
| Soccorso (ME)                | 38.16  | 15.308 | 7-8 |  |  |
| Spadafora (ME)               | 38.222 | 15.375 | 7-8 |  |  |



|                                |        |        |     |  |  |
|--------------------------------|--------|--------|-----|--|--|
| Spilinga (VV)                  | 38.628 | 15.905 | 7-8 |  |  |
| Terranova Sappo Minulio (RC)   | 38.321 | 16.007 | 7-8 |  |  |
| Tritanti (RC)                  | 38.449 | 16.101 | 7-8 |  |  |
| Acquaro (RC)                   | 38.268 | 15.899 | 7   |  |  |
| Albi (CZ)                      | 39.025 | 16.597 | 7   |  |  |
| Allume (ME)                    | 37.992 | 15.39  | 7   |  |  |
| Anoia (RC)                     | 38.436 | 16.08  | 7   |  |  |
| Anoia Superiore (RC)           | 38.432 | 16.097 | 7   |  |  |
| Antillo (ME)                   | 37.976 | 15.245 | 7   |  |  |
| Antonimina (RC)                | 38.273 | 16.15  | 7   |  |  |
| Ardore (RC)                    | 38.192 | 16.168 | 7   |  |  |
| Arena (VV)                     | 38.563 | 16.209 | 7   |  |  |
| Badolato (CZ)                  | 38.569 | 16.524 | 7   |  |  |
| Barcellona Pozzo di Gotto (ME) | 38.146 | 15.215 | 7   |  |  |
| Basicò (ME)                    | 38.061 | 15.062 | 7   |  |  |
| Bellantone (RC)                | 38.498 | 16.091 | 7   |  |  |
| Benestare (RC)                 | 38.184 | 16.139 | 7   |  |  |
| Bivongi (RC)                   | 38.483 | 16.453 | 7   |  |  |
| Bova Marina (RC)               | 37.931 | 15.919 | 7   |  |  |
| Bovalino Marina (RC)           | 38.15  | 16.177 | 7   |  |  |
| Brancaleone Marina (RC)        | 37.965 | 16.102 | 7   |  |  |
| Brancaleone Superiore (RC)     | 37.981 | 16.081 | 7   |  |  |
| Brattirò (VV)                  | 38.643 | 15.887 | 7   |  |  |
| Caltagirone (CT)               | 37.231 | 14.52  | 7   |  |  |
| Camini (RC)                    | 38.432 | 16.483 | 7   |  |  |
| Candidoni (RC)                 | 38.505 | 16.086 | 7   |  |  |
| Canneto (ME)                   | 38.491 | 14.963 | 7   |  |  |
| Capistrano (VV)                | 38.692 | 16.289 | 7   |  |  |
| Capo dell'Armi (RC)            | 37.958 | 15.681 | 7   |  |  |
| Capo d'Orlando (ME)            | 38.161 | 14.745 | 7   |  |  |
| Caraffa di Catanzaro (CZ)      | 38.881 | 16.486 | 7   |  |  |
| Careri (RC)                    | 38.177 | 16.115 | 7   |  |  |
| Caria (VV)                     | 38.646 | 15.905 | 7   |  |  |
| Caridà (RC)                    | 38.524 | 16.135 | 7   |  |  |
| Casalvecchio Siculo (ME)       | 37.958 | 15.322 | 7   |  |  |
| Castell'Umberto (ME)           | 38.085 | 14.806 | 7   |  |  |
| Catarratti (ME)                | 38.196 | 15.524 | 7   |  |  |
| Caulonia (RC)                  | 38.381 | 16.409 | 7   |  |  |
| Cenadi (CZ)                    | 38.719 | 16.415 | 7   |  |  |
| Centrache (CZ)                 | 38.729 | 16.43  | 7   |  |  |
| Cessaniti (VV)                 | 38.663 | 16.026 | 7   |  |  |
| Ciminà (RC)                    | 38.246 | 16.141 | 7   |  |  |
| Cittanova (RC)                 | 38.353 | 16.081 | 7   |  |  |
| Cumia Inferiore (ME)           | 38.175 | 15.502 | 7   |  |  |
| Curinga (CZ)                   | 38.826 | 16.313 | 7   |  |  |
| Drapia (VV)                    | 38.665 | 15.911 | 7   |  |  |
| Fabrizia (VV)                  | 38.487 | 16.299 | 7   |  |  |
| Falcone (ME)                   | 38.118 | 15.08  | 7   |  |  |
| Ficarra (ME)                   | 38.108 | 14.83  | 7   |  |  |
| Filandari (VV)                 | 38.615 | 16.03  | 7   |  |  |
| Filicudi (isola) (ME)          | 38.571 | 14.567 | 7   |  |  |
| Filogaso (VV)                  | 38.681 | 16.228 | 7   |  |  |
| Fitili (VV)                    | 38.675 | 15.931 | 7   |  |  |
| Fiumedinisi (ME)               | 38.026 | 15.381 | 7   |  |  |
| Forza d'Agrò (ME)              | 37.915 | 15.333 | 7   |  |  |
| Fossato Serralta (CZ)          | 38.996 | 16.58  | 7   |  |  |
| Francica (VV)                  | 38.617 | 16.099 | 7   |  |  |
| Furci Siculo (ME)              | 37.961 | 15.381 | 7   |  |  |
| Gagliato (CZ)                  | 38.676 | 16.462 | 7   |  |  |
| Gallodoro (ME)                 | 37.902 | 15.294 | 7   |  |  |
| Gerocarne (VV)                 | 38.587 | 16.219 | 7   |  |  |
| Giampilieri Marina (ME)        | 38.062 | 15.479 | 7   |  |  |
| Giampilieri Superiore (ME)     | 38.07  | 15.47  | 7   |  |  |
| Giardini (ME)                  | 37.835 | 15.271 | 7   |  |  |
| Giffone (RC)                   | 38.438 | 16.149 | 7   |  |  |
| Gimigliano (CZ)                | 38.974 | 16.527 | 7   |  |  |
| Gioia Tauro (RC)               | 38.426 | 15.899 | 7   |  |  |
| Gioiosa Jonica (RC)            | 38.332 | 16.302 | 7   |  |  |

|                             |        |        |   |  |  |
|-----------------------------|--------|--------|---|--|--|
| Girifalco (CZ)              | 38.823 | 16.425 | 7 |  |  |
| Graniti (ME)                | 37.89  | 15.225 | 7 |  |  |
| Grotteria (RC)              | 38.365 | 16.265 | 7 |  |  |
| Guidomandri Inferiore (ME)  | 38.043 | 15.46  | 7 |  |  |
| Guidomandri Superiore (ME)  | 38.047 | 15.447 | 7 |  |  |
| Itala (ME)                  | 38.051 | 15.437 | 7 |  |  |
| Jacurso (CZ)                | 38.846 | 16.38  | 7 |  |  |
| Jonadi (VV)                 | 38.627 | 16.055 | 7 |  |  |
| Joppolo (VV)                | 38.586 | 15.896 | 7 |  |  |
| Kaggi (ME)                  | 37.86  | 15.221 | 7 |  |  |
| Laureana di Borrello (RC)   | 38.491 | 16.082 | 7 |  |  |
| Letojanni (ME)              | 37.88  | 15.306 | 7 |  |  |
| Limina (ME)                 | 37.941 | 15.271 | 7 |  |  |
| Linguaglossa (CT)           | 37.842 | 15.139 | 7 |  |  |
| Lipari (ME)                 | 38.468 | 14.957 | 7 |  |  |
| Locadi (ME)                 | 37.989 | 15.341 | 7 |  |  |
| Maida (CZ)                  | 38.858 | 16.365 | 7 |  |  |
| Maierato (VV)               | 38.707 | 16.191 | 7 |  |  |
| Maletto (CT)                | 37.828 | 14.866 | 7 |  |  |
| Mammola (RC)                | 38.363 | 16.24  | 7 |  |  |
| Mandaradoni (VV)            | 38.575 | 15.965 | 7 |  |  |
| Mandaradoni (VV)            | 38.683 | 15.985 | 7 |  |  |
| Maranise (CZ)               | 39.013 | 16.577 | 7 |  |  |
| Martone (RC)                | 38.354 | 16.288 | 7 |  |  |
| Melia (ME)                  | 38.188 | 15.549 | 7 |  |  |
| Merì (ME)                   | 38.166 | 15.25  | 7 |  |  |
| Milazzo (ME)                | 38.224 | 15.24  | 7 |  |  |
| Mili Marina (ME)            | 38.12  | 15.516 | 7 |  |  |
| Milo (CT)                   | 37.723 | 15.117 | 7 |  |  |
| Moletì (ME)                 | 38.114 | 15.512 | 7 |  |  |
| Monasterace (RC)            | 38.454 | 16.551 | 7 |  |  |
| Mongiuffi Melia (ME)        | 37.905 | 15.275 | 7 |  |  |
| Montalbano Elicona (ME)     | 38.024 | 15.012 | 7 |  |  |
| Naso (ME)                   | 38.123 | 14.788 | 7 |  |  |
| Natile Vecchio (RC)         | 38.189 | 16.051 | 7 |  |  |
| Nicotera Marina (VV)        | 38.547 | 15.933 | 7 |  |  |
| Nizza di Sicilia (ME)       | 37.99  | 15.409 | 7 |  |  |
| Novara di Sicilia (ME)      | 38.015 | 15.13  | 7 |  |  |
| Oliveri (ME)                | 38.124 | 15.06  | 7 |  |  |
| Pace del Mela (ME)          | 38.176 | 15.309 | 7 |  |  |
| Pagliara (ME)               | 37.986 | 15.36  | 7 |  |  |
| Palizzi (RC)                | 37.966 | 15.986 | 7 |  |  |
| Palizzi Marina (RC)         | 37.92  | 15.986 | 7 |  |  |
| Panarea (isola) (ME)        | 38.638 | 15.067 | 7 |  |  |
| Paradiso (ME)               | 38.228 | 15.569 | 7 |  |  |
| Patti (ME)                  | 38.139 | 14.966 | 7 |  |  |
| Pazzano (RC)                | 38.476 | 16.452 | 7 |  |  |
| Pianopoli (CZ)              | 38.954 | 16.389 | 7 |  |  |
| Piscopio (VV)               | 38.662 | 16.113 | 7 |  |  |
| Pizzo (VV)                  | 38.734 | 16.159 | 7 |  |  |
| Pizzoni (VV)                | 38.623 | 16.252 | 7 |  |  |
| Placanica (RC)              | 38.414 | 16.451 | 7 |  |  |
| Plaesano (RC)               | 38.474 | 16.077 | 7 |  |  |
| Polia (VV)                  | 38.751 | 16.312 | 7 |  |  |
| Raddusa (CT)                | 37.474 | 14.534 | 7 |  |  |
| Radicena (RC)               | 38.355 | 16.017 | 7 |  |  |
| Riace (RC)                  | 38.419 | 16.482 | 7 |  |  |
| Ricadi (VV)                 | 38.626 | 15.867 | 7 |  |  |
| Riposto (CT)                | 37.731 | 15.203 | 7 |  |  |
| Roccalumera (ME)            | 37.975 | 15.395 | 7 |  |  |
| Roccavaldina (ME)           | 38.183 | 15.373 | 7 |  |  |
| Roccella Jonica (RC)        | 38.324 | 16.405 | 7 |  |  |
| Rombiolo (VV)               | 38.597 | 16.005 | 7 |  |  |
| San Costantino Calabro (VV) | 38.632 | 16.073 | 7 |  |  |
| San Ferdinando (RC)         | 38.482 | 15.915 | 7 |  |  |
| San Filippo del Mela (ME)   | 38.169 | 15.274 | 7 |  |  |
| San Filippo Superiore (ME)  | 38.167 | 15.5   | 7 |  |  |
| San Floro (CZ)              | 38.838 | 16.519 | 7 |  |  |

|                                  |        |        |     |  |  |
|----------------------------------|--------|--------|-----|--|--|
| San Giovanni di Gerace (RC)      | 38.365 | 16.279 | 7   |  |  |
| San Giovanni Montebello (CT)     | 37.733 | 15.159 | 7   |  |  |
| San Gregorio d'Ippona (VV)       | 38.643 | 16.105 | 7   |  |  |
| San Marco d'Alunzio (ME)         | 38.074 | 14.699 | 7   |  |  |
| San Nicola da Crissa (VV)        | 38.663 | 16.285 | 7   |  |  |
| San Pierfedele (RC)              | 38.525 | 16.143 | 7   |  |  |
| San Salvatore di Fitalia (ME)    | 38.07  | 14.778 | 7   |  |  |
| Santa Giorgia (RC)               | 38.254 | 15.936 | 7   |  |  |
| Santa Lucia del Mela (ME)        | 38.141 | 15.281 | 7   |  |  |
| Santa Teresa di Riva (ME)        | 37.946 | 15.367 | 7   |  |  |
| Sant'Angelo di Brolo (ME)        | 38.114 | 14.884 | 7   |  |  |
| Santi Pietro e Paolo d'Agrò (ME) | 37.949 | 15.309 | 7   |  |  |
| Santo Stefano di Briga (ME)      | 38.1   | 15.479 | 7   |  |  |
| Santo Stefano Medio (ME)         | 38.103 | 15.486 | 7   |  |  |
| Savoca (ME)                      | 37.954 | 15.34  | 7   |  |  |
| Sellia (CZ)                      | 38.981 | 16.63  | 7   |  |  |
| Serrastretta (CZ)                | 39.013 | 16.416 | 7   |  |  |
| Simbario (VV)                    | 38.611 | 16.335 | 7   |  |  |
| Simeri (CZ)                      | 38.933 | 16.662 | 7   |  |  |
| Sinagra (ME)                     | 38.084 | 14.849 | 7   |  |  |
| Soriano Calabro (VV)             | 38.598 | 16.23  | 7   |  |  |
| Spadola (VV)                     | 38.604 | 16.337 | 7   |  |  |
| Staiti (RC)                      | 38     | 16.034 | 7   |  |  |
| Stelletanone (RC)                | 38.486 | 16.084 | 7   |  |  |
| Stignano (RC)                    | 38.418 | 16.471 | 7   |  |  |
| Stilo (RC)                       | 38.477 | 16.468 | 7   |  |  |
| Stromboli (isola) (ME)           | 38.794 | 15.216 | 7   |  |  |
| Tresilico (RC)                   | 38.3   | 15.983 | 7   |  |  |
| Tropea (VV)                      | 38.675 | 15.899 | 7   |  |  |
| Varapodio (RC)                   | 38.316 | 15.984 | 7   |  |  |
| Vena Inferiore (VV)              | 38.672 | 16.056 | 7   |  |  |
| Vena Media (VV)                  | 38.67  | 16.057 | 7   |  |  |
| Zaccanopoli (VV)                 | 38.664 | 15.929 | 7   |  |  |
| Zungri (VV)                      | 38.655 | 15.984 | 7   |  |  |
| Zurgonadio (RC)                  | 38.299 | 15.979 | 7   |  |  |
| Aci Sant'Antonio (CT)            | 37.606 | 15.126 | 6-7 |  |  |
| Acireale (CT)                    | 37.613 | 15.166 | 6-7 |  |  |
| Amantea (CS)                     | 39.132 | 16.081 | 6-7 |  |  |
| Amaroni (CZ)                     | 38.793 | 16.447 | 6-7 |  |  |
| Amato (CZ)                       | 38.942 | 16.463 | 6-7 |  |  |
| Ardore Marina (RC)               | 38.177 | 16.207 | 6-7 |  |  |
| Augusta (SR)                     | 37.232 | 15.221 | 6-7 |  |  |
| Belcastro (CZ)                   | 39.018 | 16.785 | 6-7 |  |  |
| Belpasso (CT)                    | 37.59  | 14.979 | 6-7 |  |  |
| Borgia (CZ)                      | 38.826 | 16.511 | 6-7 |  |  |
| Briatico (VV)                    | 38.725 | 16.032 | 6-7 |  |  |
| Brognaturo (VV)                  | 38.602 | 16.341 | 6-7 |  |  |
| Calabernardo (SR)                | 36.87  | 15.136 | 6-7 |  |  |
| Calascibetta (EN)                | 37.59  | 14.273 | 6-7 |  |  |
| Caltanissetta (CL)               | 37.491 | 14.057 | 6-7 |  |  |
| Capo Spartivento (RC)            | 37.929 | 16.057 | 6-7 |  |  |
| Capri Leone (ME)                 | 38.086 | 14.73  | 6-7 |  |  |
| Castelmola (ME)                  | 37.859 | 15.277 | 6-7 |  |  |
| Catania (CT)                     | 37.502 | 15.087 | 6-7 |  |  |
| Cerva (CZ)                       | 39.023 | 16.745 | 6-7 |  |  |
| Cetraro (CS)                     | 39.517 | 15.941 | 6-7 |  |  |
| Chiaravalle Centrale (CZ)        | 38.681 | 16.412 | 6-7 |  |  |
| Cirò (KR)                        | 39.38  | 17.064 | 6-7 |  |  |
| Conflenti (CZ)                   | 39.071 | 16.286 | 6-7 |  |  |
| Cortale (CZ)                     | 38.839 | 16.412 | 6-7 |  |  |
| Cotrone (KR)                     | 39.081 | 17.127 | 6-7 |  |  |
| Cotronei (KR)                    | 39.159 | 16.778 | 6-7 |  |  |
| Crichi (CZ)                      | 38.955 | 16.639 | 6-7 |  |  |
| Daffinà (VV)                     | 38.681 | 15.951 | 6-7 |  |  |
| Daffinacello (VV)                | 38.677 | 15.944 | 6-7 |  |  |
| Falerna (CZ)                     | 39.002 | 16.173 | 6-7 |  |  |
| Favelloni (VV)                   | 38.682 | 16.028 | 6-7 |  |  |
| Filadelfia (VV)                  | 38.784 | 16.292 | 6-7 |  |  |

|                                             |        |        |     |  |  |
|---------------------------------------------|--------|--------|-----|--|--|
| Franca <span>­</span> villa Angitola (VV)   | 38.778 | 16.271 | 6-7 |  |  |
| Franca <span>­</span> villa di Sicilia (ME) | 37.903 | 15.138 | 6-7 |  |  |
| Furnari (ME)                                | 38.104 | 15.123 | 6-7 |  |  |
| Galati Mamertino (ME)                       | 38.032 | 14.772 | 6-7 |  |  |
| Gasperina (CZ)                              | 38.739 | 16.508 | 6-7 |  |  |
| Giarre (CT)                                 | 37.725 | 15.181 | 6-7 |  |  |
| Gioiosa Marea (ME)                          | 38.175 | 14.896 | 6-7 |  |  |
| Guardavalle (CZ)                            | 38.505 | 16.505 | 6-7 |  |  |
| Lercara Friddi (PA)                         | 37.748 | 13.603 | 6-7 |  |  |
| Librizzi (ME)                               | 38.097 | 14.959 | 6-7 |  |  |
| Licodia Eubea (CT)                          | 37.155 | 14.7   | 6-7 |  |  |
| Longi (ME)                                  | 38.026 | 14.752 | 6-7 |  |  |
| Magisano (CZ)                               | 39.013 | 16.628 | 6-7 |  |  |
| Mandanici (ME)                              | 38.004 | 15.316 | 6-7 |  |  |
| Marcellinara (CZ)                           | 38.928 | 16.494 | 6-7 |  |  |
| Marina di Gioiosa Jonica (RC)               | 38.301 | 16.33  | 6-7 |  |  |
| Martirano (CZ)                              | 39.081 | 16.248 | 6-7 |  |  |
| Mazzarrà Sant'Andrea (ME)                   | 38.089 | 15.133 | 6-7 |  |  |
| Melilli (SR)                                | 37.179 | 15.127 | 6-7 |  |  |
| Miglierina (CZ)                             | 38.948 | 16.472 | 6-7 |  |  |
| Mineo (CT)                                  | 37.266 | 14.691 | 6-7 |  |  |
| Mirabella Imbaccari (CT)                    | 37.326 | 14.447 | 6-7 |  |  |
| Mirto (ME)                                  | 38.085 | 14.752 | 6-7 |  |  |
| Misterbianco (CT)                           | 37.519 | 15.009 | 6-7 |  |  |
| Molino (ME)                                 | 38.075 | 15.455 | 6-7 |  |  |
| Mongiana (VV)                               | 38.513 | 16.319 | 6-7 |  |  |
| Montagnareale (ME)                          | 38.131 | 14.946 | 6-7 |  |  |
| Monteleone di Calabria (VV)                 | 38.675 | 16.102 | 6-7 |  |  |
| Monterosso Calabro (VV)                     | 38.717 | 16.289 | 6-7 |  |  |
| Motta Camastra (ME)                         | 37.894 | 15.17  | 6-7 |  |  |
| Motta Santa Lucia (CZ)                      | 39.092 | 16.29  | 6-7 |  |  |
| Nardodipace Vecchio (VV)                    | 38.446 | 16.348 | 6-7 |  |  |
| Nicotera (VV)                               | 38.552 | 15.938 | 6-7 |  |  |
| Nocera Terinese (CZ)                        | 39.037 | 16.16  | 6-7 |  |  |
| Olivadi (CZ)                                | 38.725 | 16.424 | 6-7 |  |  |
| Papanice (KR)                               | 39.072 | 17.03  | 6-7 |  |  |
| Parghelia (VV)                              | 38.681 | 15.923 | 6-7 |  |  |
| Paternò (CT)                                | 37.566 | 14.902 | 6-7 |  |  |
| Pedara (CT)                                 | 37.619 | 15.062 | 6-7 |  |  |
| Pentone (CZ)                                | 38.986 | 16.583 | 6-7 |  |  |
| Petrizzi (CZ)                               | 38.701 | 16.474 | 6-7 |  |  |
| Petronà (CZ)                                | 39.043 | 16.759 | 6-7 |  |  |
| Piedimonte Etneo (CT)                       | 37.807 | 15.177 | 6-7 |  |  |
| Potenzoni (VV)                              | 38.69  | 16.003 | 6-7 |  |  |
| Pozzillo (CT)                               | 37.66  | 15.19  | 6-7 |  |  |
| Puntalazzo (CT)                             | 37.755 | 15.143 | 6-7 |  |  |
| Quattropani (ME)                            | 38.512 | 14.917 | 6-7 |  |  |
| Raccuja (ME)                                | 38.056 | 14.91  | 6-7 |  |  |
| Ragonà (VV)                                 | 38.441 | 16.343 | 6-7 |  |  |
| Ravanusa (AG)                               | 37.268 | 13.973 | 6-7 |  |  |
| Roccafiorita (ME)                           | 37.93  | 15.268 | 6-7 |  |  |
| Roccella Valdemone (ME)                     | 37.933 | 15.009 | 6-7 |  |  |
| Rocchenere (ME)                             | 37.975 | 15.377 | 6-7 |  |  |
| Rometta Marea (ME)                          | 38.23  | 15.408 | 6-7 |  |  |
| San Mango d'Aquino (CZ)                     | 39.058 | 16.191 | 6-7 |  |  |
| San Piero Patti (ME)                        | 38.052 | 14.966 | 6-7 |  |  |
| San Pietro a Maida (CZ)                     | 38.846 | 16.345 | 6-7 |  |  |
| San Vito sullo Ionio (CZ)                   | 38.711 | 16.408 | 6-7 |  |  |
| Santa Caterina dello Ionio (CZ)             | 38.534 | 16.521 | 6-7 |  |  |
| Santa Maria la Scala (CT)                   | 37.618 | 15.173 | 6-7 |  |  |
| Sant'Agata di Militello (ME)                | 38.068 | 14.632 | 6-7 |  |  |
| Sant'Onofrio (VV)                           | 38.695 | 16.143 | 6-7 |  |  |
| Scaletta Marina (ME)                        | 38.049 | 15.468 | 6-7 |  |  |
| Scaletta Superiore (ME)                     | 38.052 | 15.466 | 6-7 |  |  |
| Sciglio (ME)                                | 37.986 | 15.387 | 6-7 |  |  |
| Serra San Bruno (VV)                        | 38.577 | 16.33  | 6-7 |  |  |
| Sersale (CZ)                                | 39.011 | 16.728 | 6-7 |  |  |
| Settingiano (CZ)                            | 38.913 | 16.514 | 6-7 |  |  |

|                                  |        |        |     |  |  |
|----------------------------------|--------|--------|-----|--|--|
| Sommatino (CL)                   | 37.334 | 13.992 | 6-7 |  |  |
| Sorbo San Basile (CZ)            | 39.02  | 16.569 | 6-7 |  |  |
| Sorianello (VV)                  | 38.592 | 16.233 | 6-7 |  |  |
| Soverato (CZ)                    | 38.688 | 16.549 | 6-7 |  |  |
| Soverato Superiore (CZ)          | 38.689 | 16.53  | 6-7 |  |  |
| Soveria Simeri (CZ)              | 38.947 | 16.679 | 6-7 |  |  |
| Squillace (CZ)                   | 38.781 | 16.519 | 6-7 |  |  |
| Sutera (CL)                      | 37.524 | 13.733 | 6-7 |  |  |
| Tiriolo (CZ)                     | 38.947 | 16.509 | 6-7 |  |  |
| Tripi (ME)                       | 38.046 | 15.096 | 6-7 |  |  |
| Troina (EN)                      | 37.784 | 14.599 | 6-7 |  |  |
| Ucria (ME)                       | 38.046 | 14.881 | 6-7 |  |  |
| Valguarnera Caropepe (EN)        | 37.496 | 14.389 | 6-7 |  |  |
| Vallelonga (VV)                  | 38.647 | 16.294 | 6-7 |  |  |
| Vazzano (VV)                     | 38.632 | 16.247 | 6-7 |  |  |
| Viagrande (CT)                   | 37.61  | 15.098 | 6-7 |  |  |
| Villarosa (EN)                   | 37.586 | 14.174 | 6-7 |  |  |
| Zafferana Etnea (CT)             | 37.693 | 15.105 | 6-7 |  |  |
| Zambrone (VV)                    | 38.699 | 15.991 | 6-7 |  |  |
| Adernò (CT)                      | 37.668 | 14.834 | 6   |  |  |
| Alcara li Fusi (ME)              | 38.022 | 14.7   | 6   |  |  |
| Andali (CZ)                      | 39.013 | 16.77  | 6   |  |  |
| Argusto (CZ)                     | 38.68  | 16.436 | 6   |  |  |
| Arietta (CZ)                     | 39.052 | 16.789 | 6   |  |  |
| Avola (SR)                       | 36.909 | 15.135 | 6   |  |  |
| Barrafranca (EN)                 | 37.376 | 14.201 | 6   |  |  |
| Belvedere di Spinello (KR)       | 39.213 | 16.888 | 6   |  |  |
| Biancavilla (CT)                 | 37.644 | 14.867 | 6   |  |  |
| Caccuri (KR)                     | 39.227 | 16.779 | 6   |  |  |
| Cardinale (CZ)                   | 38.643 | 16.387 | 6   |  |  |
| Carlentini (SR)                  | 37.275 | 15.015 | 6   |  |  |
| Castel di Lucio (ME)             | 37.887 | 14.312 | 6   |  |  |
| Catanzaro (CZ)                   | 38.915 | 16.586 | 6   |  |  |
| Catanzaro Marina (CZ)            | 38.822 | 16.613 | 6   |  |  |
| Cattolica Eraclea (AG)           | 37.44  | 13.395 | 6   |  |  |
| Celico (CS)                      | 39.31  | 16.34  | 6   |  |  |
| Cesarò (ME)                      | 37.844 | 14.714 | 6   |  |  |
| Cicala (CZ)                      | 39.022 | 16.486 | 6   |  |  |
| Cirò Marina (KR)                 | 39.37  | 17.128 | 6   |  |  |
| Cona (CZ)                        | 39.046 | 16.75  | 6   |  |  |
| Cropani (CZ)                     | 38.968 | 16.782 | 6   |  |  |
| Cutro (KR)                       | 39.033 | 16.983 | 6   |  |  |
| Davoli (CZ)                      | 38.65  | 16.485 | 6   |  |  |
| Decollatura (CZ)                 | 39.045 | 16.358 | 6   |  |  |
| Dipignano (CS)                   | 39.237 | 16.252 | 6   |  |  |
| Domanico (CS)                    | 39.217 | 16.206 | 6   |  |  |
| Fagnano Castello (CS)            | 39.564 | 16.054 | 6   |  |  |
| Ferla (SR)                       | 37.119 | 14.94  | 6   |  |  |
| Fiumefreddo Bruzio (CS)          | 39.235 | 16.066 | 6   |  |  |
| Floridia (SR)                    | 37.082 | 15.153 | 6   |  |  |
| Fuscaldo (CS)                    | 39.415 | 16.030 | 6   |  |  |
| Grammichele (CT)                 | 37.215 | 14.636 | 6   |  |  |
| Guardia Piemontese (CS)          | 39.466 | 15.999 | 6   |  |  |
| Isca sullo Ionio (CZ)            | 38.601 | 16.52  | 6   |  |  |
| Leni (ME)                        | 38.556 | 14.827 | 6   |  |  |
| Lentini (SR)                     | 37.285 | 14.998 | 6   |  |  |
| Malfa (ME)                       | 38.58  | 14.835 | 6   |  |  |
| Malito (CS)                      | 39.154 | 16.248 | 6   |  |  |
| Marcedusa (CZ)                   | 39.027 | 16.836 | 6   |  |  |
| Marina d'Itala (ME)              | 38.036 | 15.451 | 6   |  |  |
| Mascali (CT)                     | 37.758 | 15.195 | 6   |  |  |
| Mascalucia (CT)                  | 37.575 | 15.05  | 6   |  |  |
| Melissa (KR)                     | 39.304 | 17.022 | 6   |  |  |
| Mesoraca (KR)                    | 39.078 | 16.789 | 6   |  |  |
| Mili San Pietro (ME)             | 38.127 | 15.488 | 6   |  |  |
| Militello in Val di Catania (CT) | 37.274 | 14.793 | 6   |  |  |
| Mistretta (ME)                   | 37.928 | 14.361 | 6   |  |  |
| Montalto Uffugo (CS)             | 39.406 | 16.158 | 6   |  |  |

|                                       |        |        |     |  |  |
|---------------------------------------|--------|--------|-----|--|--|
| Montauro (CZ)                         | 38.748 | 16.512 | 6   |  |  |
| Montepaone (CZ)                       | 38.723 | 16.497 | 6   |  |  |
| Motta d'Affermo (ME)                  | 37.982 | 14.303 | 6   |  |  |
| Nicastro (CZ)                         | 38.975 | 16.318 | 6   |  |  |
| Nicolosi (CT)                         | 37.614 | 15.026 | 6   |  |  |
| Palermiti (CZ)                        | 38.751 | 16.454 | 6   |  |  |
| Paola (CS)                            | 39.361 | 16.041 | 6   |  |  |
| Petilia Policastro (KR)               | 39.112 | 16.789 | 6   |  |  |
| Pietraperzia (EN)                     | 37.42  | 14.137 | 6   |  |  |
| Resuttano (CL)                        | 37.68  | 14.03  | 6   |  |  |
| Roggiano Gravina (CS)                 | 39.616 | 16.157 | 6   |  |  |
| Rocca di Neto (KR)                    | 39.191 | 17.002 | 6   |  |  |
| Rogliano (CS)                         | 39.178 | 16.323 | 6   |  |  |
| Rose (CS)                             | 39.399 | 16.288 | 6   |  |  |
| Salina (isola) (ME)                   | 38.562 | 14.873 | 6   |  |  |
| Salinà (ME)                           | 38.143 | 14.866 | 6   |  |  |
| Sambiase (CZ)                         | 38.967 | 16.282 | 6   |  |  |
| San Benedetto Ullano (CS)             | 39.426 | 16.123 | 6   |  |  |
| San Fratello (ME)                     | 38.016 | 14.597 | 6   |  |  |
| San Leo (VV)                          | 38.719 | 16.024 | 6   |  |  |
| San Lucido (CS)                       | 39.307 | 16.049 | 6   |  |  |
| San Martino di Finita (CS)            | 39.49  | 16.108 | 6   |  |  |
| San Pietro Apostolo (CZ)              | 39.004 | 16.469 | 6   |  |  |
| San Sostene (CZ)                      | 38.636 | 16.487 | 6   |  |  |
| Sanginetto (CS)                       | 39.605 | 15.913 | 6   |  |  |
| Santa Caterina Villarmosa (CL)        | 37.59  | 14.032 | 6   |  |  |
| Santa Marina Salina (ME)              | 38.562 | 14.873 | 6   |  |  |
| Santa Severina (KR)                   | 39.147 | 16.913 | 6   |  |  |
| Santa Sofia d'Epiro (CS)              | 39.547 | 16.329 | 6   |  |  |
| Sant'Agata di Esaro (CS)              | 39.62  | 15.983 | 6   |  |  |
| Sant'Andrea Apostolo dello Ionio (CZ) | 38.623 | 16.528 | 6   |  |  |
| Santo Todaro (VV)                     | 38.443 | 16.374 | 6   |  |  |
| Sortino (SR)                          | 37.157 | 15.027 | 6   |  |  |
| Spezzano Grande (CS)                  | 39.3   | 16.34  | 6   |  |  |
| Staletti (CZ)                         | 38.765 | 16.54  | 6   |  |  |
| Strongoli (KR)                        | 39.266 | 17.05  | 6   |  |  |
| Taormina (ME)                         | 37.852 | 15.286 | 6   |  |  |
| Taverna (CZ)                          | 39.021 | 16.582 | 6   |  |  |
| Tipoldo (ME)                          | 38.133 | 15.485 | 6   |  |  |
| Torre di Ruggiero (CZ)                | 38.651 | 16.372 | 6   |  |  |
| Tortorici (ME)                        | 38.029 | 14.825 | 6   |  |  |
| Vallefiorita (CZ)                     | 38.776 | 16.46  | 6   |  |  |
| Vizzini (CT)                          | 37.163 | 14.755 | 6   |  |  |
| Vulcano (isola) (ME)                  | 38.399 | 14.969 | 6   |  |  |
| Acquaformosa (CS)                     | 39.722 | 16.09  | 5-6 |  |  |
| Acri (CS)                             | 39.491 | 16.386 | 5-6 |  |  |
| Aiello Calabro (CS)                   | 39.117 | 16.166 | 5-6 |  |  |
| Altomonte (CS)                        | 39.699 | 16.131 | 5-6 |  |  |
| Belmonte Calabro (CS)                 | 39.161 | 16.079 | 5-6 |  |  |
| Belvedere (SR)                        | 37.092 | 15.208 | 5-6 |  |  |
| Belvedere Marittimo (CS)              | 39.618 | 15.863 | 5-6 |  |  |
| Bisignano (CS)                        | 39.513 | 16.285 | 5-6 |  |  |
| Bonifati (CS)                         | 39.586 | 15.902 | 5-6 |  |  |
| Campofranco (CL)                      | 37.512 | 13.713 | 5-6 |  |  |
| Canna (CS)                            | 40.094 | 16.505 | 5-6 |  |  |
| Cariati (CS)                          | 39.497 | 16.949 | 5-6 |  |  |
| Carpanzano (CS)                       | 39.148 | 16.303 | 5-6 |  |  |
| Castiglione Cosentino (CS)            | 39.352 | 16.288 | 5-6 |  |  |
| Centuripe (EN)                        | 37.622 | 14.741 | 5-6 |  |  |
| Cerami (EN)                           | 37.81  | 14.508 | 5-6 |  |  |
| Cerisano (CS)                         | 39.276 | 16.175 | 5-6 |  |  |
| Cervicati (CS)                        | 39.542 | 16.128 | 5-6 |  |  |
| Cerzeto (CS)                          | 39.508 | 16.115 | 5-6 |  |  |
| Cleto (CS)                            | 39.091 | 16.158 | 5-6 |  |  |
| Cosenza (CS)                          | 39.303 | 16.252 | 5-6 |  |  |
| Crucoli (KR)                          | 39.425 | 17.004 | 5-6 |  |  |
| Falconara Albanese (CS)               | 39.276 | 16.091 | 5-6 |  |  |
| Giarratana (RG)                       | 37.048 | 14.794 | 5-6 |  |  |



|                            |        |        |     |  |  |
|----------------------------|--------|--------|-----|--|--|
| Gizzeria (CZ)              | 38.981 | 16.206 | 5-6 |  |  |
| Isola di Capo Rizzuto (KR) | 38.959 | 17.096 | 5-6 |  |  |
| Lago (CS)                  | 39.169 | 16.147 | 5-6 |  |  |
| Licata (AG)                | 37.102 | 13.939 | 5-6 |  |  |
| Longobucco (CS)            | 39.449 | 16.611 | 5-6 |  |  |
| Lungro (CS)                | 39.742 | 16.122 | 5-6 |  |  |
| Modica (RG)                | 36.859 | 14.761 | 5-6 |  |  |
| Mongrassano (CS)           | 39.526 | 16.111 | 5-6 |  |  |
| Nicosia (EN)               | 37.748 | 14.398 | 5-6 |  |  |
| Nocara (CS)                | 40.099 | 16.483 | 5-6 |  |  |
| Noto (SR)                  | 36.891 | 15.07  | 5-6 |  |  |
| Oriolo (CS)                | 40.053 | 16.447 | 5-6 |  |  |
| Palagonia (CT)             | 37.327 | 14.745 | 5-6 |  |  |
| Paterno Calabro (CS)       | 39.228 | 16.265 | 5-6 |  |  |
| Pettineo (ME)              | 37.967 | 14.291 | 5-6 |  |  |
| Platania (CZ)              | 39.006 | 16.32  | 5-6 |  |  |
| Ramacca (CT)               | 37.385 | 14.694 | 5-6 |  |  |
| Regalbuto (EN)             | 37.652 | 14.641 | 5-6 |  |  |
| Roccabernarda (KR)         | 39.133 | 16.868 | 5-6 |  |  |
| Rossano (CS)               | 39.574 | 16.635 | 5-6 |  |  |
| San Cataldo (CL)           | 37.485 | 13.989 | 5-6 |  |  |
| San Demetrio Corone (CS)   | 39.568 | 16.362 | 5-6 |  |  |
| San Fili (CS)              | 39.339 | 16.144 | 5-6 |  |  |
| San Giorgio Albanese (CS)  | 39.582 | 16.454 | 5-6 |  |  |
| San Lorenzo del Vallo (CS) | 39.666 | 16.295 | 5-6 |  |  |
| San Marco Argentano (CS)   | 39.557 | 16.119 | 5-6 |  |  |
| San Mauro Marchesato (KR)  | 39.104 | 16.925 | 5-6 |  |  |
| San Nicola dell'Alto (KR)  | 39.291 | 16.973 | 5-6 |  |  |
| San Pietro in Amantea (CS) | 39.136 | 16.112 | 5-6 |  |  |
| San Sosti (CS)             | 39.661 | 16.028 | 5-6 |  |  |
| San Teodoro (ME)           | 37.847 | 14.7   | 5-6 |  |  |
| Satriano (CZ)              | 38.667 | 16.482 | 5-6 |  |  |
| Scandale (KR)              | 39.121 | 16.96  | 5-6 |  |  |
| Scordia (CT)               | 37.296 | 14.843 | 5-6 |  |  |
| Serra d'Aiello (CS)        | 39.09  | 16.129 | 5-6 |  |  |
| Serradifalco (CL)          | 37.457 | 13.881 | 5-6 |  |  |
| Siracusa (SR)              | 37.083 | 15.285 | 5-6 |  |  |
| Tusa (ME)                  | 37.984 | 14.237 | 5-6 |  |  |
| Agira (EN)                 | 37.655 | 14.523 | 5   |  |  |
| Amendolara (CS)            | 39.953 | 16.581 | 5   |  |  |
| Badolato Marina (CZ)       | 38.573 | 16.566 | 5   |  |  |
| Biscari (RG)               | 37.026 | 14.494 | 5   |  |  |
| Brolo (ME)                 | 38.157 | 14.829 | 5   |  |  |
| Brucoli (SR)               | 37.283 | 15.187 | 5   |  |  |
| Caltavuturo (PA)           | 37.821 | 13.891 | 5   |  |  |
| Capizzi (ME)               | 37.849 | 14.479 | 5   |  |  |
| Capo Rizzuto (KR)          | 38.906 | 17.101 | 5   |  |  |
| Caronia (ME)               | 38.024 | 14.441 | 5   |  |  |
| Casino (KR)                | 39.27  | 16.767 | 5   |  |  |
| Cassano allo Ionio (CS)    | 39.785 | 16.318 | 5   |  |  |
| Castel di Tusa (ME)        | 38.009 | 14.252 | 5   |  |  |
| Castelbuono (PA)           | 37.93  | 14.09  | 5   |  |  |
| Castiglione Marittimo (CZ) | 38.981 | 16.159 | 5   |  |  |
| Castrofilippo (AG)         | 37.349 | 13.749 | 5   |  |  |
| Castrogiovanni (EN)        | 37.566 | 14.275 | 5   |  |  |
| Castrovillari (CS)         | 39.815 | 16.202 | 5   |  |  |
| Comiso (RG)                | 36.946 | 14.606 | 5   |  |  |
| Corleone (PA)              | 37.813 | 13.301 | 5   |  |  |
| Delia (CL)                 | 37.358 | 13.927 | 5   |  |  |
| Diamante (CS)              | 39.678 | 15.82  | 5   |  |  |
| Lagonegro (PZ)             | 40.125 | 15.764 | 5   |  |  |
| Lauria (PZ)                | 40.047 | 15.836 | 5   |  |  |
| Malvagna (ME)              | 37.917 | 15.055 | 5   |  |  |
| Marano Marchesato (CS)     | 39.314 | 16.172 | 5   |  |  |
| Marianopoli (CL)           | 37.598 | 13.915 | 5   |  |  |
| Marina Schiavonea (CS)     | 39.652 | 16.541 | 5   |  |  |
| Marineo (PA)               | 37.952 | 13.415 | 5   |  |  |
| Militello Rosmarino (ME)   | 38.046 | 14.676 | 5   |  |  |

|                                |        |        |     |  |  |
|--------------------------------|--------|--------|-----|--|--|
| Moio Alcantara (ME)            | 37.9   | 15.05  | 5   |  |  |
| Niscemi (CL)                   | 37.147 | 14.389 | 5   |  |  |
| Palermo (PA)                   | 38.121 | 13.353 | 5   |  |  |
| Palinuro (SA)                  | 40.034 | 15.288 | 5   |  |  |
| Pallagorio (KR)                | 39.307 | 16.91  | 5   |  |  |
| Praia a Mare (CS)              | 39.899 | 15.78  | 5   |  |  |
| Reitano (ME)                   | 37.972 | 14.345 | 5   |  |  |
| Rosolini (SR)                  | 36.821 | 14.949 | 5   |  |  |
| Sant'Eufemia Marina (CZ)       | 38.931 | 16.214 | 5   |  |  |
| Santo Stefano di Camastra (ME) | 38.015 | 14.351 | 5   |  |  |
| Sapri (SA)                     | 40.075 | 15.631 | 5   |  |  |
| Scalea (CS)                    | 39.815 | 15.792 | 5   |  |  |
| Spezzano Albanese (CS)         | 39.67  | 16.311 | 5   |  |  |
| Terranova di Sicilia (CL)      | 37.072 | 14.24  | 5   |  |  |
| Terrati (CS)                   | 39.135 | 16.142 | 5   |  |  |
| Umbriatico (KR)                | 39.353 | 16.917 | 5   |  |  |
| Verzino (KR)                   | 39.313 | 16.861 | 5   |  |  |
| Vibonati (SA)                  | 40.1   | 15.584 | 5   |  |  |
| Villalba (CL)                  | 37.654 | 13.843 | 5   |  |  |
| Vittoria (RG)                  | 36.951 | 14.532 | 5   |  |  |
| Zagarise (CZ)                  | 39     | 16.663 | 5   |  |  |
| Alimena (PA)                   | 37.695 | 14.113 | 4-5 |  |  |
| Campofelice di Fitalia (PA)    | 37.827 | 13.486 | 4-5 |  |  |
| Cefalù (PA)                    | 38.037 | 14.02  | 4-5 |  |  |
| Chiaramonte Gulfi (RG)         | 37.031 | 14.702 | 4-5 |  |  |
| Cuturella (CZ)                 | 38.987 | 16.779 | 4-5 |  |  |
| Mazzarelli (RG)                | 36.784 | 14.555 | 4-5 |  |  |
| Palma di Montechiaro (AG)      | 37.193 | 13.762 | 4-5 |  |  |
| Valllunga Pratameno (CL)       | 37.683 | 13.831 | 4-5 |  |  |
| Villabate (PA)                 | 38.077 | 13.444 | 4-5 |  |  |
| Villafranca Sicula (AG)        | 37.588 | 13.29  | 4-5 |  |  |
| Baucina (PA)                   | 37.925 | 13.538 | 4   |  |  |
| Donnalucata (RG)               | 36.763 | 14.638 | 4   |  |  |
| Lecce (LE)                     | 40.352 | 18.169 | 4   |  |  |
| Maratea (PZ)                   | 39.994 | 15.721 | 4   |  |  |
| Marzamemi (SR)                 | 36.742 | 15.118 | 4   |  |  |
| Naro (AG)                      | 37.296 | 13.793 | 4   |  |  |
| Padula (SA)                    | 40.341 | 15.659 | 4   |  |  |
| Polla (SA)                     | 40.515 | 15.494 | 4   |  |  |
| Pollina (PA)                   | 37.992 | 14.145 | 4   |  |  |
| Porticello (PA)                | 38.089 | 13.539 | 4   |  |  |
| Portopalo di Capo Passero (SR) | 36.682 | 15.135 | 4   |  |  |
| Potenza (PZ)                   | 40.639 | 15.805 | 4   |  |  |
| Pozzallo (RG)                  | 36.728 | 14.845 | 4   |  |  |
| Punta Secca (RG)               | 36.789 | 14.494 | 4   |  |  |
| Rende (CS)                     | 39.332 | 16.183 | 4   |  |  |
| Roccapalumba (PA)              | 37.806 | 13.639 | 4   |  |  |
| Salerno (SA)                   | 40.679 | 14.765 | 4   |  |  |
| Sciacca (AG)                   | 37.508 | 13.083 | 4   |  |  |
| Scoglitti (RG)                 | 36.891 | 14.43  | 4   |  |  |
| Sorrento (NA)                  | 40.625 | 14.378 | 4   |  |  |
| Spinazzola (BT)                | 40.969 | 16.089 | 4   |  |  |
| Termini Imerese (PA)           | 37.985 | 13.698 | 4   |  |  |
| Trabia (PA)                    | 37.995 | 13.655 | 4   |  |  |
| Valledolmo (PA)                | 37.747 | 13.826 | 4   |  |  |
| Cerignola (FG)                 | 41.264 | 15.898 | 3-4 |  |  |
| San Martino Sannita (BN)       | 41.066 | 14.837 | 3-4 |  |  |
| Valletta (Malta)               | 35.899 | 14.513 | 3-4 |  |  |
| Alessano (LE)                  | 39.89  | 18.331 | 3   |  |  |
| Avellino (AV)                  | 40.915 | 14.791 | 3   |  |  |
| Bagheria (PA)                  | 38.079 | 13.508 | 3   |  |  |
| Balestrate (PA)                | 38.051 | 13.006 | 3   |  |  |
| Canicattì (AG)                 | 37.361 | 13.849 | 3   |  |  |
| Favara (AG)                    | 37.315 | 13.658 | 3   |  |  |
| Girgenti (AG)                  | 37.31  | 13.587 | 3   |  |  |
| Mottola (TA)                   | 40.635 | 17.037 | 3   |  |  |
| Torre Cerchiara (CS)           | 39.797 | 16.48  | 3   |  |  |
| Trapani (TP)                   | 38.018 | 12.537 | 3   |  |  |

|                 |        |        |   |  |  |
|-----------------|--------|--------|---|--|--|
| Trebisacce (CS) | 39.866 | 16.531 | 3 |  |  |
| Ustica (PA)     | 38.709 | 13.192 | 3 |  |  |
